# Supplementary material for: Buckybowl and its chiral hybrids featuring eight-membered rings and helicene units
Source: Royal Society of Chemistry journal article supplement (doi:10.1039/d3sc00658a), 2023-01-01
Supplement: d3sc00658a1.pdf [file d3sc00658a1.pdf]

*Supporting Information for:*

# **Buckybowl and Its Chiral Hybrids Featuring Eight-Membered Rings and Helicene Units**

Yuxiao Duan<sup>†</sup>, Meng Chen<sup>†</sup>, Hironobu Hayashi<sup>δ</sup>, Hiroko Yamada<sup>δ</sup>, Xinyue Liu<sup>†</sup>, and Lei Zhang<sup>†,‡\*</sup>

<sup>†</sup> Beijing Advanced Innovation Center for Soft Matter Science and Engineering, Beijing University of Chemical Technology, Beijing 100029, P. R. China

<sup>‡</sup> State Key Lab of Organic-Inorganic Composites, Beijing University of Chemical Technology, Beijing 100029, P. R. China

<sup>δ</sup> Division of Materials Science Nara Institute of Science and Technology (NAIST) 8916-5 Takayama-cho, Ikoma, Nara 630-0192, Japan

E-mail: zhl@mail.buct.edu.cn

## **Table of contents**

|                                                                                          |            |
|------------------------------------------------------------------------------------------|------------|
| <b>1. Materials and Methods.....</b>                                                     | <b>S2</b>  |
| <b>2. Synthesis and Characterization of Compounds.....</b>                               | <b>S2</b>  |
| <b>3. CV and UV Measurement.....</b>                                                     | <b>S6</b>  |
| <b>4. X-ray Crystallographic Data for 5, 7, 8, 9 and 9·C<sub>60</sub> .....</b>          | <b>S6</b>  |
| <b>5. Density Functional Theory Results.....</b>                                         | <b>S13</b> |
| <b>6. VT-NMR Spectra of 7, 8, and 9.....</b>                                             | <b>S34</b> |
| <b>7. Chiral HPLC Analysis and Kinetic Study of Racemization Barrier of 8 and 9.....</b> | <b>S36</b> |
| <b>8. Binding behaviors with C<sub>60</sub>.....</b>                                     | <b>S37</b> |
| <b>9. OFET Fabrication and Characterization.....</b>                                     | <b>S41</b> |
| <b>10. <sup>1</sup>H NMR, <sup>13</sup>C NMR, and HRMS spectra of compounds.....</b>     | <b>S43</b> |
| <b>11. References.....</b>                                                               | <b>S58</b> |

## 1. Materials and Methods

All chemicals were used as received from commercial suppliers without further purification unless otherwise specified. THF and diethyl ether was refluxed with Na prior to use.  $^1\text{H}$  NMR and  $^{13}\text{C}$  NMR spectra were recorded in deuterated solvents on Bruker ADVANCE 400 NMR Spectrometer. Chemical shifts were reported in parts per million (ppm,  $\delta$ ) relative to the signal of tetramethylsilane ( $\delta = 0.00$  ppm).  $^1\text{H}$  NMR spectra were referenced to the signals of  $\text{CDCl}_3$  ( $\delta = 7.26$  ppm) and 1,1,2,2-tetrachloroethane- $d_2$  ( $\delta = 6.00$  ppm).  $^{13}\text{C}$  NMR spectra were referenced to the signal of  $\text{CDCl}_3$  ( $\delta = 77.2$  ppm) and 1,1,2,2-tetrachloroethane- $d_2$  ( $\delta = 73.8$  ppm). Mass spectra (MALDI-TOF-MS) were determined on a Bruker BIFLEX III Mass Spectrometer. High resolution mass spectra (HRMS) were determined on Bruker Apex IV Fourier Transform Mass Spectrometer.

## 2. Synthesis and Characterization of Compounds

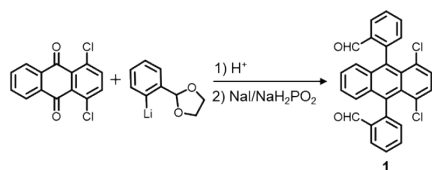

To a 250 mL two necked round-bottom flask was charged with 2-(2-bromophenyl)-1,3-dioxolane (9.9 g, 43.2 mmol) in dry ethyl ether (60 mL), the mixture was deoxygenated with nitrogen for 10 min at 0 °C, followed by adding n-BuLi (16.7 mL of 2.5 M solution; 41.8 mmol). The solution was stirred for 1 h and 1,4-dichloroanthraquinone (4 g, 14.4 mmol) in tetrahydrofuran (60 mL) was added, then warmed to room temperature and stirred for another 2 h. The reaction mixture was quenched with methanol and the solvent was removed under reduced pressure. The residue was dissolved in 60 mL glacial acetic acid followed by adding sodium iodide (15.1 g, 101 mmol) and sodium hypophosphite monohydrate (15.2 g, 144 mmol) and then heated to reflux for 30 min. The reaction mixture was cooled down to room temperature, poured into water, and filtered. The precipitate was washed with water, and dried over anhydrous sodium sulfate. The crude production was purified by silica gel chromatography using dichloromethane:petroleum ether (1:1) as eluent to afford a mixture of diastereomers **1** (*syn*-**1** and *anti*-**1**) (3.9 g, 60 %).

*syn*-**1**:  $^1\text{H}$  NMR (400 MHz,  $\text{CDCl}_3$ ):  $\delta = 9.64$  (s, 2H), 8.17-8.15 (m, 2H), 7.76-7.68 (m, 4H), 7.42-7.39 (m, 4H), 7.37-7.31 (m, 4H).  $^{13}\text{C}$  NMR (100 MHz,  $\text{CDCl}_3$ ):  $\delta = 191.5, 144.0, 136.2, 133.9, 133.4, 132.7, 132.1, 130.9, 128.9, 128.7, 128.4, 127.8, 127.4, 126.7$ . HRMS (ESI)  $[\text{M}+\text{Na}]^+$ : Calcd (%) for  $\text{C}_{28}\text{H}_{16}\text{Cl}_2\text{O}_2\text{Na}^+$ : 477.0425, found: 477.0416;

*anti*-**1**:  $^1\text{H}$  NMR (400 MHz,  $\text{CDCl}_3$ )  $\delta = 9.60$  (s, 2H), 8.17-8.15 (m, 2H), 7.75-7.68 (m, 4H), 7.43-7.41 (m, 4H), 7.36 (s, 4H).  $^{13}\text{C}$  NMR (400 MHz,  $\text{CDCl}_3$ )  $\delta = 191.2, 144.0, 136.2, 133.9, 133.2, 132.8, 132.1, 130.9, 129.0, 128.7, 128.5, 127.8, 127.4, 126.8$ . HRMS (ESI)  $[\text{M}+\text{Na}]^+$ : Calcd (%) for  $\text{C}_{28}\text{H}_{16}\text{Cl}_2\text{O}_2\text{Na}^+$ : 477.0425, found: 477.0414.

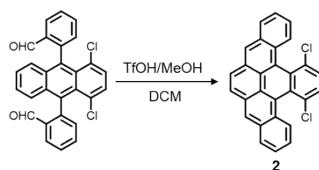

To a mixture of **1** (100 mg, 0.2 mmol) and methanol (2 mL) in dichloromethane (200 mL) was added trifluoromethanesulfonic acid (triflic acid) (0.1 mL). The solution was stirred at room temperature for 48 h before the solvent was removed. The crude production was purified by silica

gel chromatography using dichloromethane:petroleum ether (1 : 9) as eluent to afford **2** (25 mg, 30%).

$^1\text{H}$  NMR (400 MHz,  $\text{CDCl}_3$ ):  $\delta$  = 8.45 (s, 2H), 8.28-8.26 (m, 2H), 8.19-8.17 (m, 2H), 7.80 (d,  $J$  = 4.6 Hz, 4H), 7.67-7.60 (m, 4H).  $^{13}\text{C}$  NMR (400 MHz,  $\text{CDCl}_3$ ):  $\delta$  = 132.5, 131.6, 130.9, 130.8, 130.2, 128.1, 128.0, 127.8, 127.8, 127.5, 127.4, 126.5, 125.9, 124.4. HRMS (EI): Calcd (%) for  $\text{C}_{28}\text{H}_{14}\text{Cl}_2$ :

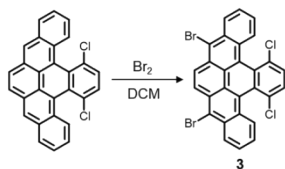

420.0473, found: 420.0468.

A solution of **2** (100 mg, 0.24 mmol) in dichloromethane (200 mL) was added elemental bromine (307 mg, 1.92 mmol) and the solution was stirred at room temperature for 10 min. The reaction was quenched by saturated aqueous sodium sulfite and the organic layer was extracted with dichloromethane. The combined organic layer was washed with brine and dried over anhydrous sodium sulfate. The filtrate was evaporated to give **3** as yellow solid (125 mg, 90%).

$^1\text{H}$  NMR (400 MHz,  $\text{CDCl}_3$ ):  $\delta$  8.72 (d,  $J$  = 8.9 Hz, 2H), 8.42 (s, 2H), 8.24 (d,  $J$  = 8.3 Hz, 2H), 7.79 (s, 2H), 7.79 – 7.71 (m, 2H), 7.67 (t,  $J$  = 7.6 Hz, 2H).  $^{13}\text{C}$  NMR (400 MHz,  $\text{CDCl}_3/\text{CS}_2$ ):  $\delta$  = 132.6, 131.3, 130.9, 130.5, 129.8, 128.7, 127.5, 127.3, 126.3, 126.0, 125.4, 124.2, 122.7. .HR-MALDI-TOF ( $m/z$ ): Calcd (%) for  $\text{C}_{28}\text{H}_{12}\text{Br}_2\text{Cl}_2$ : 579.8632, found: 579.8628.

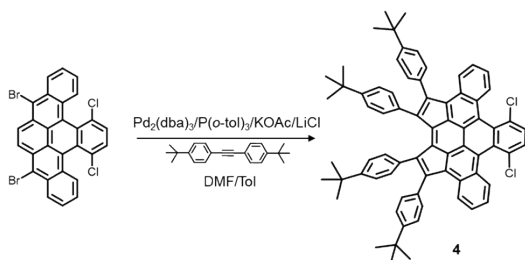

In a sealed tube, a solution of **3** (400 mg, 0.69 mmol), 1,2-bis(4-(tert-butyl)phenyl)ethyne (400 mg, 1.38 mmol),  $\text{Pd}_2(\text{dba})_3$  (63 mg, 0.069 mmol),  $\text{P}(\text{o-Tol})_3$  (32 mg, 0.1 mmol),  $\text{KOAc}$  (339 mg, 3.45 mmol),  $\text{LiCl}$  (58 mg, 1.38 mmol), and 1:1 DMF:Toluene (50 ml) was degassed with nitrogen for 15 min and then stirred at 130 °C for 12 h. The solvent was diluted with toluene and washed twice with water, and dried over anhydrous sodium sulfate. The crude product was further purified by silica gel column chromatography using dichloromethane:petroleum ether (1 : 5) as eluent to afford **4** as green solid (410 mg, 60%).

$^1\text{H}$  NMR (400 MHz,  $\text{C}_2\text{D}_2\text{Cl}_4$ ):  $\delta$  8.29 (d,  $J$  = 8.6 Hz, 2H), 7.75 (s, 2H), 7.70 – 7.61 (m, 4H), 7.53 – 7.45 (m, 2H), 7.36 (d,  $J$  = 8.2 Hz, 4H), 7.26 (d,  $J$  = 8.0 Hz, 4H), 6.94 (d,  $J$  = 8.3 Hz, 4H), 6.73 (d,  $J$  = 8.3 Hz, 4H), 1.37 (s, 18H), 1.13 (s, 18H).  $^{13}\text{C}$  NMR (400 MHz,  $\text{CDCl}_3$ ):  $\delta$  = 150.7, 150.0, 148.2, 134.4, 132.8, 131.8, 131.6, 131.5, 130.3, 130.2, 129.9, 129.4, 128.6, 126.0, 124.9, 124.8, 123.7, 123.6, 34.8, 34.3, 31.6, 31.4. HR-MALDI-TOF ( $m/z$ ): Calcd (%) for  $\text{C}_{72}\text{H}_{62}\text{Cl}_2$ : 996.4228, found: 996.4229.

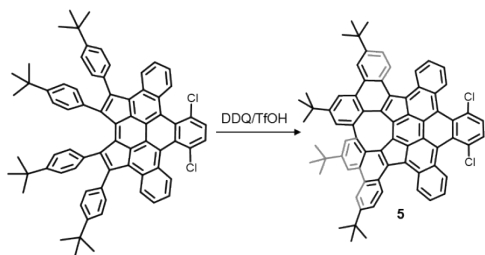

In a round bottom flask, **4** (100 mg, 0.10 mmol) was dissolved in  $\text{CH}_2\text{Cl}_2$  (20 ml) and degassed with nitrogen for 15 min. The mixture was cooled to  $-10^\circ\text{C}$  and DDQ (91 mg, 0.4 mmol) was added in one portion, then TfOH (0.5 mL) was added dropwise. After 15 min, the mixture was quenched with  $\text{H}_2\text{O}$  (10 mL) and was extracted with  $\text{CH}_2\text{Cl}_2$  (30 mL). The organic layer was dried over anhydrous sodium sulfate and the solvent was removed in vacuo. The crude product was further purified by silica gel column chromatography using dichloromethane:petroleum ether (1 : 8) as eluent to afford **5** as red solid (59 mg, 60%).

$^1\text{H}$  NMR (400 MHz,  $\text{C}_2\text{D}_2\text{Cl}_4$ ):  $\delta$  9.09 (d,  $J = 8.8$  Hz, 1H), 8.86 (d,  $J = 12.8$  Hz, 2H), 8.76 (d,  $J = 12.4$  Hz, 3H), 8.62 (s, 1H), 8.53 (s, 1H), 8.34 (d,  $J = 8.0$  Hz, 2H), 7.94 – 7.83 (m, 2H), 7.80 (s, 2H), 7.70 (t,  $J = 7.3$  Hz, 1H), 7.73 – 7.48 (m, 3H), 7.16 (d,  $J = 17.8$  Hz, 2H), 1.65 (s, 9H), 1.60 (s, 9H), 1.48 (s, 9H), 1.45 (s, 9H).  $^{13}\text{C}$  NMR (400 MHz,  $\text{CDCl}_3/\text{CS}_2$ ):  $\delta = 146.9, 146.8, 144.3, 141.1, 134.8, 134.1, 132.5, 132.3, 131.9, 131.6, 131.3, 131.1, 130.9, 129.9, 128.3, 128.0, 126.9, 126.5, 125.8, 125.6, 125.3, 124.3, 124.2, 124.2, 120.7, 119.8, 119.1, 118.8, 35.4, 35.3, 34.8, 34.6, 31.6, 31.4, 31.3, 31.2$ . HR-MALDI-TOF ( $m/z$ ): Calcd (%) for  $\text{C}_{72}\text{H}_{56}\text{Cl}_2$ : 990.3759, found: 990.3760.

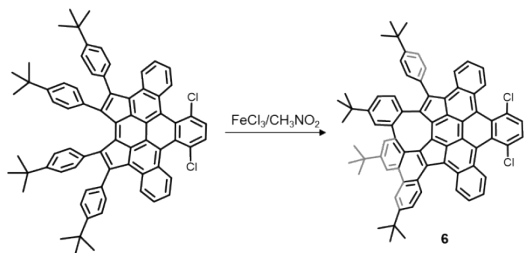

In a round bottom flask, **4** (300 mg, 0.30 mmol) was dissolved in  $\text{CH}_2\text{Cl}_2$  (120 ml) and degassed with nitrogen for 15 min. Then the mixture was cooled to  $0^\circ\text{C}$  and  $\text{FeCl}_3$  (293 mg, 1.8 mmol) in  $\text{CH}_3\text{NO}_2$  (2 ml) was added dropwise. The reaction mixture was stirred at  $0^\circ\text{C}$  for 12 h and quenched with MeOH (10 mL), washed with water. The organic layer was dried over anhydrous sodium sulfate and the solvent was removed in vacuo. The crude product was further purified by silica gel column chromatography using dichloromethane:petroleum ether (1 : 8) as eluent to afford **6** as red solid (90 mg, 30%).

$^1\text{H}$  NMR (400 MHz,  $\text{C}_2\text{D}_2\text{Cl}_4$ ):  $\delta$  8.74 (t,  $J = 9.3$  Hz, 2H), 8.60 (s, 1H), 8.53 (s, 1H), 8.34 (d,  $J = 8.3$  Hz, 1H), 8.24 (d,  $J = 8.3$  Hz, 1H), 8.01 (d,  $J = 7.7$  Hz, 1H), 7.88 (d,  $J = 6.1$  Hz, 2H), 7.77 (s, 2H), 7.67 (d,  $J = 8.6$  Hz, 1H), 7.60 (s, 2H), 7.56–7.42 (m, 4H), 7.34 (t,  $J = 8.0$  Hz, 1H), 7.08 (s, 2H), 6.68 (s, 1H), 1.64 (s, 9H), 1.55 (s, 9H), 1.47 (s, 9H), 1.20 (s, 9H).  $^{13}\text{C}$  NMR (400 MHz,  $\text{CDCl}_3/\text{CS}_2$ ):  $\delta = 150.3, 148.6, 133.6, 133.0, 133.0, 132.6, 131.7, 131.5, 131.5, 131.4, 131.2, 131.2, 131.0, 130.4, 128.4, 126.7, 125.9, 125.8, 125.6, 125.3, 125.2, 124.3, 124.1, 123.9, 123.7, 120.5, 118.3, 35.3, 34.8, 34.8, 34.2, 31.6, 31.5, 31.4, 31.2$ . HR-MALDI-TOF ( $m/z$ ): Calcd (%) for  $\text{C}_{72}\text{H}_{58}\text{Cl}_2$ : 992.3915, found: 992.3924.

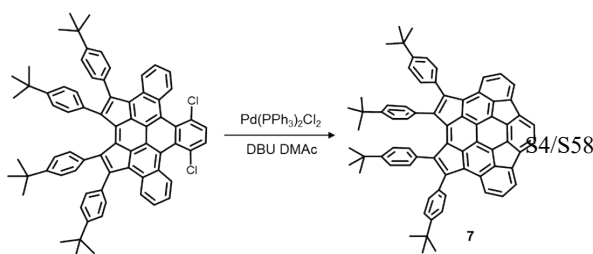

In a sealed tube, PdCl<sub>2</sub>(PPh<sub>3</sub>)<sub>2</sub> (42 mg, 0.06 mmol) was added to a solution of **4** (100 mg, 0.10 mmol) and DBU (91 mg, 0.60 mmol) in dried DMAc (6 mL) under nitrogen. The mixture was heated to 180 °C and stirred for 2 h. After cooling, the solvent was diluted with dichloromethane and washed with water, dried over anhydrous sodium sulfate. The crude product was further purified by silica gel column chromatography using dichloromethane:petroleum ether (1 : 6) as eluent to afford **7** as brown solid (14 mg, 15%).

<sup>1</sup>H NMR (400 MHz, CDCl<sub>3</sub>): δ 7.46 (d, *J* = 6.8 Hz, 2H), 7.38 (s, 2H), 7.31 (d, *J* = 8.6 Hz, 4H), 7.17 (d, *J* = 6.3 Hz, 4H), 7.04 (dd, *J* = 8.6, 6.9 Hz, 2H), 6.90 (t, *J* = 8.6 Hz, 6H), 6.71 (d, *J* = 8.5 Hz, 4H), 1.34 (s, 18H), 1.11 (s, 18H). <sup>13</sup>C NMR (400 MHz, C<sub>2</sub>D<sub>2</sub>Cl<sub>4</sub>): δ = 150.8, 148.2, 147.8, 144.2, 142.8, 142.0, 140.9, 139.9, 139.2, 138.7, 138.7, 138.3, 133.1, 132.5, 131.1, 129.9, 129.3, 128.5, 125.3, 125.1, 124.6, 123.5, 121.7, 34.5, 34.0, 31.2, 31.1. HR-MALDI-TOF (*m/z*): Calcd (%) for C<sub>72</sub>H<sub>60</sub>: 924.4695, found: 924.4685.

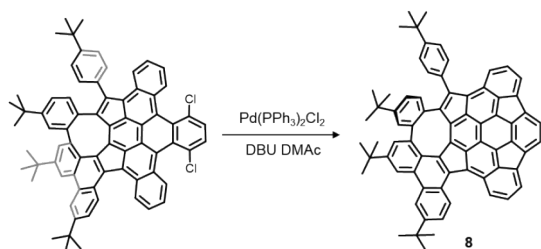

In a sealed tube, a solution of **6** (100 mg, 0.10 mmol) and DBU (91 mg, 0.60 mmol) in super dry DMAc (6 mL) was added PdCl<sub>2</sub>(PPh<sub>3</sub>)<sub>2</sub> (42 mg, 0.06 mmol) under nitrogen. The mixture was heated to 180 °C in an oil bath and stirred for 2 h before cooling to room temperature. Then the solvent was diluted with dichloromethane and washed twice with water, dried over anhydrous sodium sulfate and the solvent removed in vacuo. The crude product was further purified by silica gel column chromatography using dichloromethane:petroleum ether (1 : 6) as eluent to afford **8** as brown solid (18 mg, 20%).

<sup>1</sup>H NMR (400 MHz, C<sub>2</sub>D<sub>2</sub>Cl<sub>4</sub>): δ 8.88 (d, *J* = 8.3 Hz, 1H), 8.51 (s, 1H), 8.41 (s, 1H), 8.31 (d, *J* = 8.3 Hz, 1H), 8.22 (d, *J* = 8.9 Hz, 1H), 7.90 (d, *J* = 9.0 Hz, 1H), 7.68 (d, *J* = 6.8 Hz, 1H), 7.52 (d, *J* = 6.8 Hz, 1H), 7.48 (d, *J* = 6.9 Hz, 1H), 7.43 – 7.31 (m, 6H), 7.29 – 7.19 (m, 2H), 7.14 (t, *J* = 9.3 Hz, 2H), 6.85 (s, 1H), 1.60 (s, 9H), 1.44 (s, 18H), 1.26 (s, 9H). <sup>13</sup>C NMR (400 MHz, CDCl<sub>3</sub>/CS<sub>2</sub>): δ = 151.5, 150.4, 148.9, 148.7, 146.3, 145.9, 144.5, 143.8, 143.0, 142.8, 142.7, 141.3, 140.7, 140.4, 140.1, 139.9, 139.7, 139.5, 139.4, 139.4, 139.2, 139.0, 138.7, 136.1, 134.1, 132.6, 132.6, 132.2, 132.1, 131.7, 131.7, 130.7, 130.6, 130.6, 130.2, 130.1, 129.5, 128.8, 128.5, 128.1, 127.8, 126.7, 125.8, 125.6, 125.4, 125.0, 124.4, 121.7, 121.6, 120.3, 118.4, 35.3, 34.8, 34.6, 34.3, 31.6, 31.5, 31.3. HR-MALDI-TOF (*m/z*): Calcd (%) for C<sub>72</sub>H<sub>56</sub>: 920.4382, found: 920.4374.

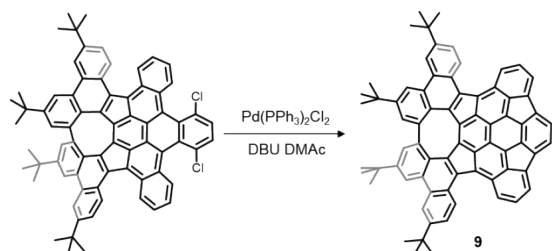

In a sealed tube, PdCl<sub>2</sub>(PPh<sub>3</sub>)<sub>2</sub> (42 mg, 0.06 mmol) was added to a solution of **5** (100 mg, 0.10 mmol) and DBU (91 mg, 0.60 mmol) in super dry DMAc (6 mL) under nitrogen. The mixture was heated to 180 °C and stirred for 2 h. After cooling, the solvent was diluted with dichloromethane and washed with water, dried over anhydrous sodium sulfate. The crude product was further purified by

silica gel column chromatography using dichloromethane:petroleum ether (1 : 6) as eluent to afford **9** as red solid (37 mg, 40%).

$^1\text{H}$  NMR (400 MHz,  $\text{C}_2\text{D}_2\text{Cl}_4$ ):  $\delta$  9.18 (d,  $J = 8.7$  Hz, 1H), 8.94 (d,  $J = 8.4$  Hz, 1H), 8.80 (s, 1H), 8.65 (s, 1H), 8.56 (s, 1H), 8.46 (s, 1H), 8.35 (d,  $J = 8.7$  Hz, 1H), 8.23 (d,  $J = 8.8$  Hz, 1H), 7.93 (d,  $J = 8.6$  Hz, 2H), 7.64 (d,  $J = 6.9$  Hz, 1H), 7.57 (d,  $J = 6.9$  Hz, 1H), 7.53 – 7.38 (m, 3H), 7.33 (s, 1H), 7.32 – 7.24 (m, 1H), 6.81 (s, 1H), 1.61 (s, 18H), 1.51 (s, 9H), 1.31 (s, 9H).  $^{13}\text{C}$  NMR (400 MHz,  $\text{CDCl}_3/\text{CS}_2$ ):  $\delta = 150.4, 150.2, 149.1, 146.7, 145.6, 144.6, 144.5, 143.8, 143.7, 142.5, 141.6, 141.0, 140.8, 140.8, 140.5, 139.8, 139.6, 139.2, 139.2, 139.0, 138.6, 138.2, 135.2, 134.6, 134.5, 133.8, 132.5, 132.2, 132.0, 131.1, 130.4, 130.2, 130.1, 129.1, 128.7, 127.7, 127.3, 126.9, 126.8, 126.5, 125.8, 125.6, 125.4, 125.0, 124.6, 121.9, 121.8, 120.4, 119.9, 118.9, 118.7, 35.3, 35.3, 34.7, 34.4, 31.6, 31.5, 31.2, 31.1$ . HR-MALDI-TOF ( $m/z$ ): Calcd (%) for  $\text{C}_{72}\text{H}_{54}$ : 918.4225, found: 918.4219.

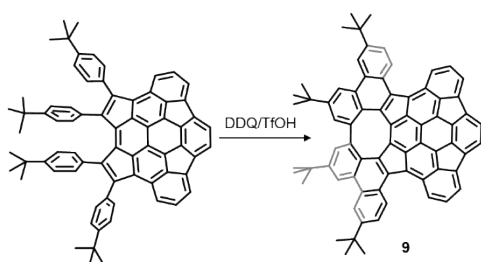

In a round bottom flask, **7** (20 mg, 0.02 mmol) was dissolved in  $\text{CH}_2\text{Cl}_2$  (10 mL) and degassed with nitrogen for 15 min. The mixture was chilled to  $-15^\circ\text{C}$  and DDQ (20 mg, 0.08 mmol) was added in one portion, then TFOH (0.5 mL) was added dropwise. After 15 min, the mixture was quenched with  $\text{H}_2\text{O}$  (10 mL) and was extracted with  $\text{CH}_2\text{Cl}_2$  (30 mL). The organic layer was dried over anhydrous sodium sulfate and the solvent was removed in vacuo. The crude product was further purified by silica gel column chromatography using dichloromethane:petroleum ether (1 : 8) as eluent to afford **9** as red solid (5 mg, 30%).

$^1\text{H}$  NMR (400 MHz,  $\text{C}_2\text{D}_2\text{Cl}_4$ ):  $\delta$  9.18 (d,  $J = 8.7$  Hz, 1H), 8.94 (d,  $J = 8.4$  Hz, 1H), 8.80 (s, 1H), 8.65 (s, 1H), 8.56 (s, 1H), 8.46 (s, 1H), 8.35 (d,  $J = 8.7$  Hz, 1H), 8.23 (d,  $J = 8.8$  Hz, 1H), 7.93 (d,  $J = 8.6$  Hz, 2H), 7.64 (d,  $J = 6.9$  Hz, 1H), 7.57 (d,  $J = 6.9$  Hz, 1H), 7.53 – 7.38 (m, 3H), 7.33 (s, 1H), 7.32 – 7.24 (m, 1H), 6.81 (s, 1H), 1.61 (s, 18H), 1.51 (s, 9H), 1.31 (s, 9H).  $^{13}\text{C}$  NMR (400 MHz,  $\text{CDCl}_3/\text{CS}_2$ ):  $\delta = 150.4, 150.2, 149.1, 146.7, 145.6, 144.6, 144.5, 143.8, 143.7, 142.5, 141.6, 141.0, 140.8, 140.8, 140.5, 139.8, 139.6, 139.2, 139.2, 139.0, 138.6, 138.2, 135.2, 134.6, 134.5, 133.8, 132.5, 132.2, 132.0, 131.1, 130.4, 130.2, 130.1, 129.1, 128.7, 127.7, 127.3, 126.9, 126.8, 126.5, 125.8, 125.6, 125.4, 125.0, 124.6, 121.9, 121.8, 120.4, 119.9, 118.9, 118.7, 35.3, 35.3, 34.7, 34.4, 31.6, 31.5, 31.2, 31.1$ . HR-MALDI-TOF ( $m/z$ ): Calcd (%) for  $\text{C}_{72}\text{H}_{54}$ : 918.4225, found: 918.4219.

### 3. CV and UV Spectra of Compounds

Cyclic voltammograms (CVs) were recorded on a 1000B model electrochemical workstation using glassy carbon discs as the working electrode, Pt wire as the counter electrode,  $\text{Ag}/\text{Ag}^+$  electrode as the reference electrode, ferrocene/ferrocenium as an internal potential marker, and tetrabutylammonium hexafluorophosphate (TBAPF<sub>6</sub>, 0.1 M) as the supporting electrolyte. UV-vis absorption spectra were measured with Hitachi (model U-3010) UV-Vis spectrophotometer (chloroform solution,  $\sim 10^{-5}$  M).

### 4. X-ray Crystallographic Data for **5**, **7**, **8**, **9**, and **9**· $\text{C}_{60}$

Single crystals **5** and **7** suitable for X-ray diffraction analysis could be obtained by slow diffusion of methanol into a chloroform solution at room temperature. Single crystals **9** suitable for X-ray

diffraction analysis could be obtained by slow diffusion of methanol into toluene solution at room temperature. Single crystals **8** suitable for X-ray diffraction analysis could be obtained by slow diffusion of isopropyl alcohol into a CS<sub>2</sub> solution at room temperature. Single crystals of **9.C<sub>60</sub>** suitable for X-ray diffraction analysis could be obtained by slow diffusion of toluene solution at room temperature. The X-ray diffraction data were collected on a MM007HF Saturn724+ diffractometer with graphite monochromated Cu K $\alpha$  radiation (1.54184 Å). Using Olex2, these structures were solved with the ShelXS and refined with the ShelXL-2014 refinement package using Least Squares minimization. Crystallographic data have been deposited with the Cambridge Crystallographic Data Centre as supplementary publication No. CCDC 2205342 (**5**), 2205221 (**7**), 2208030 (**8**), 2208032 (**9**), and 2234896(**9.C<sub>60</sub>**). The single crystal X-ray crystallographic data were summarized in Table S1.

**Table S1.** Crystal data and structure refinement for **5**, **7**, **8**, **9**, and **9.C<sub>60</sub>**.

| Identification code                        | <b>5</b>                                                            | <b>7</b>                                             | <b>8</b>                                       | <b>9</b>                                                         | <b>9.C<sub>60</sub></b>                           |
|--------------------------------------------|---------------------------------------------------------------------|------------------------------------------------------|------------------------------------------------|------------------------------------------------------------------|---------------------------------------------------|
| Empirical formula                          | C <sub>72</sub> H <sub>56</sub> Cl <sub>2</sub> , CHCl <sub>3</sub> | 2C <sub>72</sub> H <sub>60</sub> ,3CHCl <sub>3</sub> | C <sub>72</sub> H <sub>56</sub>                | C <sub>72</sub> H <sub>54</sub> , 2C <sub>7</sub> H <sub>8</sub> | C <sub>72</sub> H <sub>54</sub> , C <sub>60</sub> |
| Formula weight                             | 1111.43                                                             | 2208.50                                              | 921.16                                         | 1086.34                                                          | 1639.75                                           |
| Crystal system                             | Trigonal                                                            | Triclinic                                            | Triclinic                                      | Monoclinic                                                       | Monoclinic                                        |
| Space group                                | <i>R</i> -3                                                         | <i>P</i> -1                                          | <i>P</i> -1                                    | <i>P</i> 2 <sub>1</sub> /c                                       | <i>P</i> 2 <sub>1</sub> /c                        |
| Radiation type                             | Cu K $\alpha$                                                       | Cu K $\alpha$                                        | Cu K $\alpha$                                  | Cu K $\alpha$                                                    | Cu K $\alpha$                                     |
| Radiation wavelength(Å)                    | 1.54184                                                             | 1.54184                                              | 1.54184                                        | 1.54184                                                          | 1.54184                                           |
| T(K)                                       | 169.99(12)                                                          | 169.99(11)                                           | 169.99(10)                                     | 170.00(10)                                                       | 172.99(10)                                        |
| a(Å)                                       | 31.90908(14)                                                        | 11.5164(5)                                           | 12.6634(6)                                     | 11.53234(11)                                                     | 172.99(10)                                        |
| b(Å)                                       | 31.90908(14)                                                        | 17.9050(5)                                           | 19.4621(6)                                     | 17.84770(19)                                                     | 18.02860(10)                                      |
| c(Å)                                       | 37.27060(18)                                                        | 31.0340(10)                                          | 22.1410(6)                                     | 30.0310(3)                                                       | 26.3919(3)                                        |
| $\alpha$ (deg)                             | 90                                                                  | 77.629(2)                                            | 101.227(2)                                     | 90                                                               | 90                                                |
| $\beta$ (deg)                              | 90                                                                  | 80.917(3)                                            | 95.079(3)                                      | 91.5252(9)                                                       | 100.3460(10)                                      |
| $\gamma$ (deg)                             | 120                                                                 | 84.108(3)                                            | 100.078(3)                                     | 90                                                               | 90                                                |
| V(Å <sup>3</sup> )                         | 32864.4(3)                                                          | 6156.5(4)                                            | 5227.1(3)                                      | 6178.96(11)                                                      | 9113.61(15)                                       |
| Z                                          | 18                                                                  | 2                                                    | 4                                              | 4                                                                | 4                                                 |
| $\rho_{\text{calc}}$ (g cm <sup>-3</sup> ) | 1.011                                                               | 1.191                                                | 1.171                                          | 1.168                                                            | 1.195                                             |
| $\theta$ , range(°)                        | 2.77 – 75.28                                                        | 2.533 -75.449                                        | 3.444 – 67.002                                 | 3.848-63.023                                                     | 2.307-77.844                                      |
| R(int)                                     | 3.26%                                                               | 15.34%                                               | 10.73%                                         | 12.57%                                                           | 5.86%                                             |
| $\mu$ (mm <sup>-1</sup> )                  | 2.070                                                               | 2.256                                                | 0.498                                          | 0.496                                                            | 0.522                                             |
| F(000)                                     | 10440.0                                                             | 2316.0                                               | 1952.0                                         | 2307.0                                                           | 3384.0                                            |
| Crystal size (mm <sup>3</sup> )            | 0.42 × 0.21 × 0.19                                                  | 0.3 × 0.13 × 0.11                                    | 0.25 × 0.14 × 0.021                            | 0.35 × 0.07 × 0.04                                               | 0.21 × 0.11 × 0.01                                |
| Index ranges                               | -33 ≤ h ≤ 39,<br>-40 ≤ k ≤ 39,<br>-46 ≤ l ≤ 46                      | -14 ≤ h ≤ 14,<br>-22 ≤ k ≤ 22,<br>-9 ≤ l ≤ 38        | -14 ≤ h ≤ 14,<br>-23 ≤ k ≤ 22,<br>-24 ≤ l ≤ 26 | -13 ≤ h ≤ 13,<br>-16 ≤ k ≤ 20,<br>-34 ≤ l ≤ 31                   | -24 ≤ h ≤ 24,<br>-20 ≤ k ≤ 22,<br>-33 ≤ l ≤ 33    |
| Absorption correction                      | spherical harmonics                                                 | spherical harmonics                                  | spherical harmonics                            | spherical harmonics                                              | spherical harmonics                               |

|                                                           |                                     |                                     |                                     |                                     |                                     |
|-----------------------------------------------------------|-------------------------------------|-------------------------------------|-------------------------------------|-------------------------------------|-------------------------------------|
| Max. transmission                                         | 1.0000                              | 1.0000                              | 1.0000                              | 1.0000                              | 1.0000                              |
| Min. transmission                                         | 0.33936                             | 0.82986                             | 0.17338                             | 0.15635                             | 0.41165                             |
| Goodness-of-fit on $F^2$                                  | 1.049                               | 1.536                               | 1.043                               | 1.069                               | 1.078                               |
| Final R indices [ $I > 2\sigma(I)$ ]                      | $R_1 = 0.0643$ ,<br>$wR_2 = 0.1845$ | $R_1 = 0.1631$ ,<br>$wR_2 = 0.4168$ | $R_1 = 0.0953$ ,<br>$wR_2 = 0.2567$ | $R_1 = 0.0601$ ,<br>$wR_2 = 0.1527$ | $R_1 = 0.0769$ ,<br>$wR_2 = 0.2206$ |
| R indices (all data)                                      | $R_1 = 0.0671$ ,<br>$wR_2 = 0.1871$ | $R_1 = 0.2019$ ,<br>$wR_2 = 0.4440$ | $R_1 = 0.1265$ ,<br>$wR_2 = 0.2838$ | $R_1 = 0.0647$ ,<br>$wR_2 = 0.1590$ | $R_1 = 0.0914$ ,<br>$wR_2 = 0.2338$ |
| Largest diff. peak and hole ( $e \cdot \text{\AA}^{-3}$ ) | 1.57 and -1.09                      | 1.10 and -1.05                      | 0.55 and -0.42                      | 0.35 and -0.39                      | 1.19 and -0.41                      |

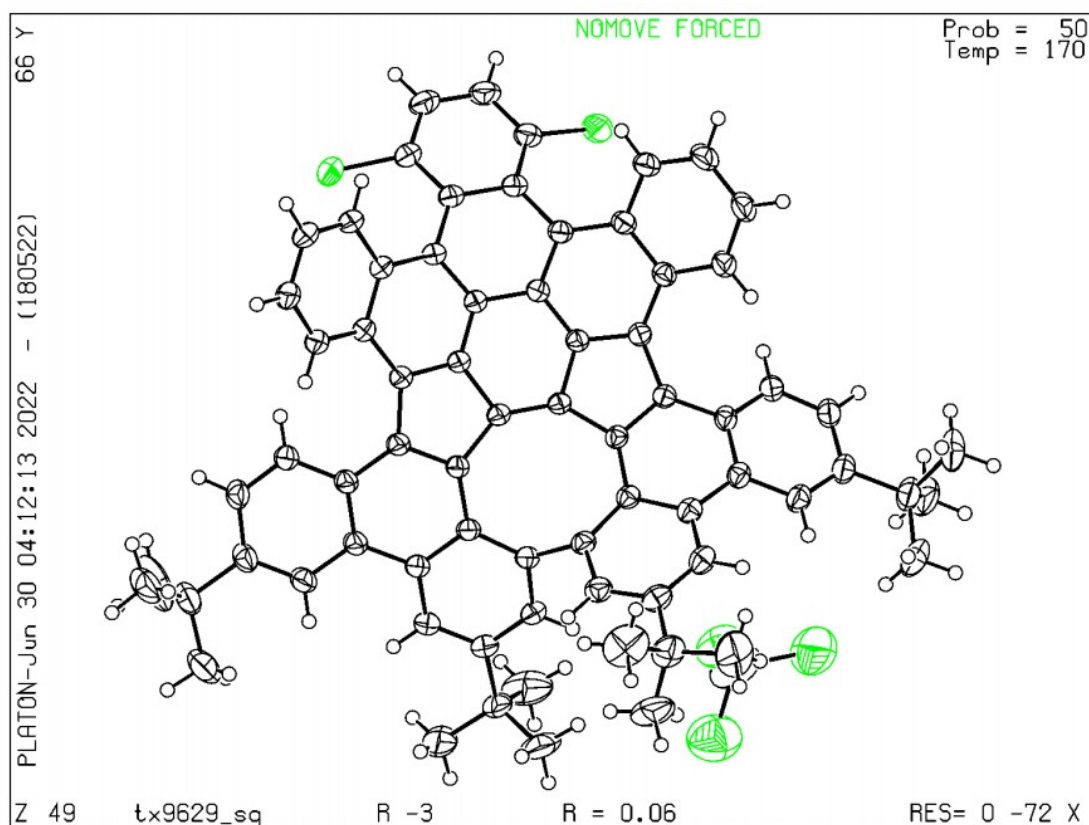

**Fig. S1** Ellipsoid plots of **5** with 50% probability ellipsoids. Chlorine atoms are depicted by green ellipsoids; Hydrogens are depicted by white circles.



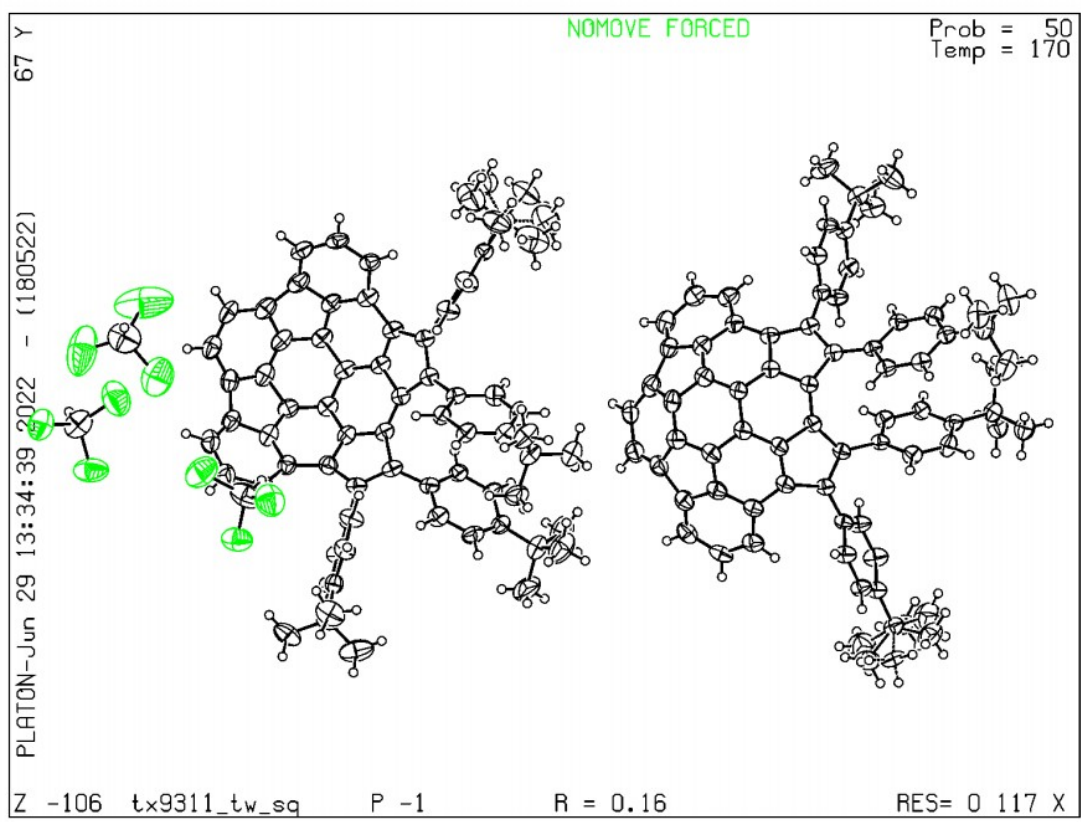

**Fig. S2** Ellipsoid plots of 7 with 50% probability ellipsoids. Chlorine atoms are depicted by green ellipsoids; Hydrogens are depicted by white circles.

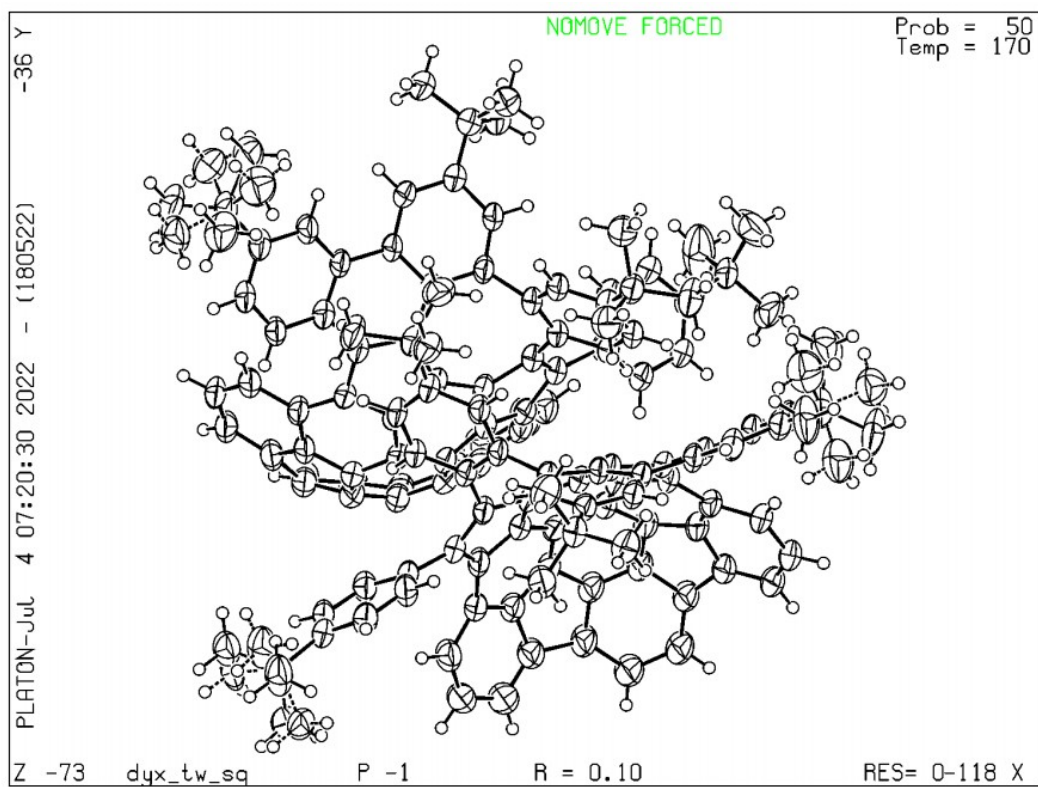

**Fig. S3** Ellipsoid plots of **8** with 50% probability ellipsoids. Hydrogens are depicted by white circles.

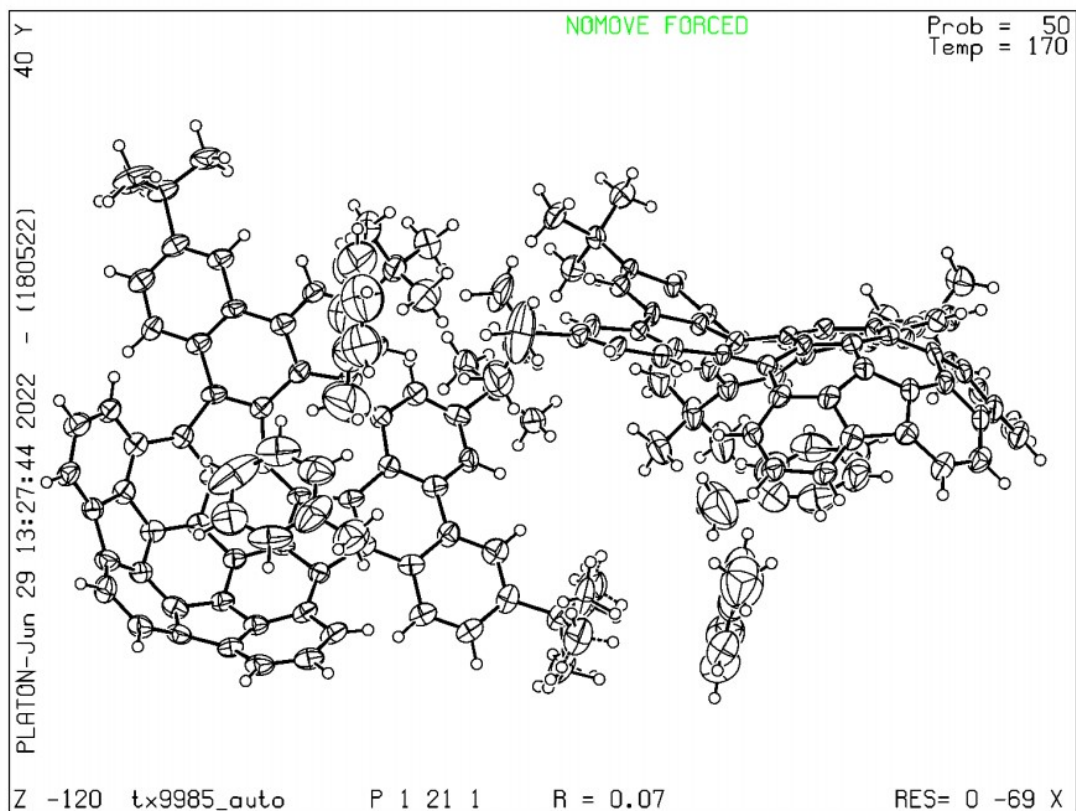

**Fig. S4** Ellipsoid plots of **9** with 50% probability ellipsoids. Hydrogens are depicted by white circles.

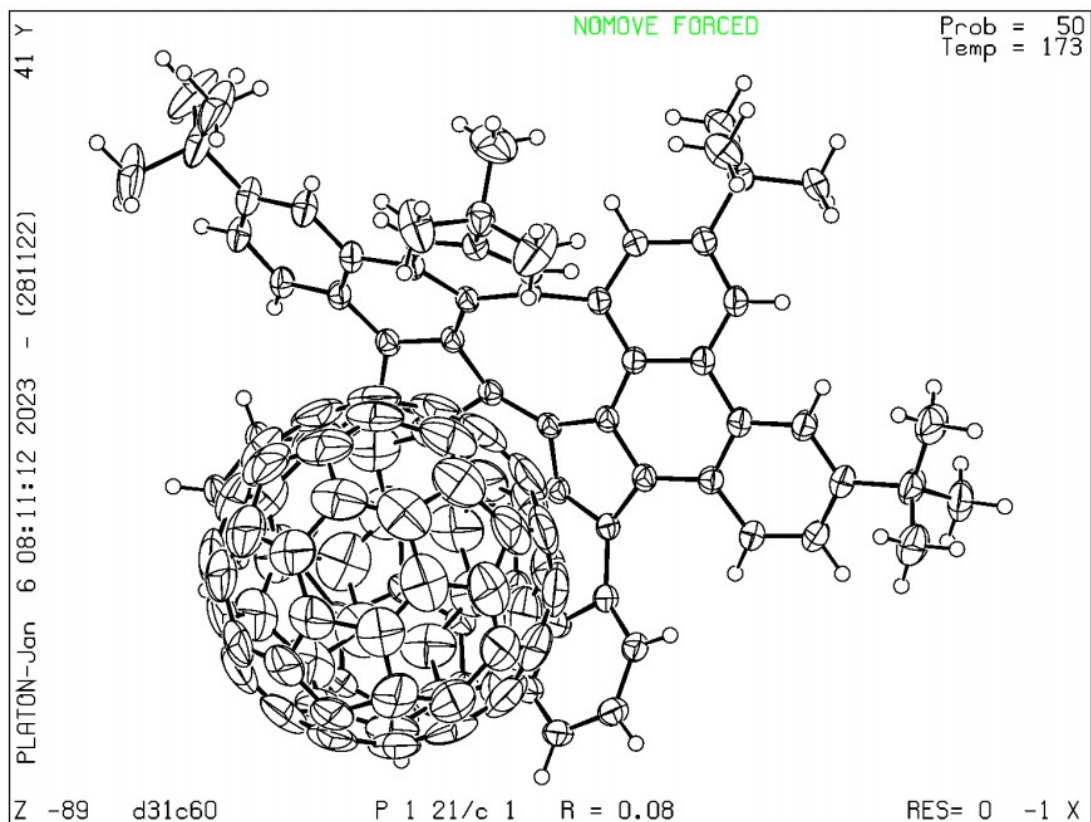

**Fig. S5** Ellipsoid plots of **9**·C<sub>60</sub> with 50% probability ellipsoids. Hydrogens are depicted by white circles.

## 5. Density Functional Theory Results

All density functional theory (DFT) calculations were performed using Gaussian 09, Revision D.01 program<sup>[1]</sup>. The geometry of **7**, **8** and **9** was optimized at the B3LYP level with the 6-311G(d,p) basis set at gas phase. Time-dependent density functional theory (TD-DFT) UV-vis were calculated at the CAM-B3LYP/6-311G(d,p) level in CHCl<sub>3</sub> with the IEFPCM solvent model and at least the 100 excited states were considered. For better comparison with experimental data, Lorentz broadening with a half width at half height of 0.4 eV was applied to the line spectra obtained. Major orbital transition contributions in excited states were generated using Multiwfn 3.8 software<sup>[2]</sup>. NICS values were calculated (B3LYP/6-31G(d,p)) using the standard GIAO procedure (NMR pop=NCSall);<sup>[3]</sup> ACID plot (B3LYP/6-31G(d,p)) was calculated by using the method developed by Herges based on the optimized ground-state geometries.<sup>[4]</sup> The iso-chemical shielding surface (ICSS)<sup>[5]</sup> calculations were carried out and the VMD programme<sup>[6]</sup> was used to plot ICSS cube files; Charge transfer integrals were calculated by fragment orbital method with the GGA:PW91/TZP level of theory using Amsterdam Density Functional (ADF) program<sup>[7]</sup>.

The optimization and freq calculations of the TS were conducted at the B3LYP/6-311G(d,p) level in vacuo and only one imaginary frequency exists. The connection between the transition states and the ground state was confirmed by IRC calculation.

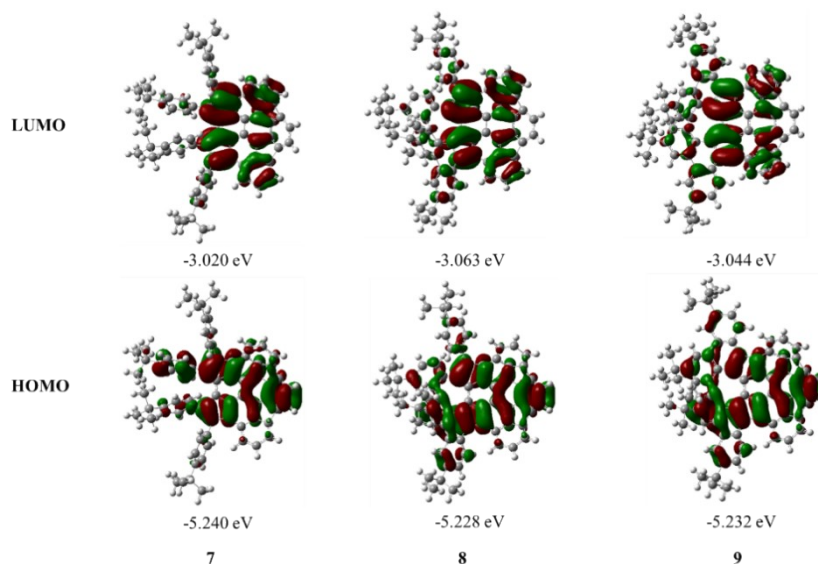

**Fig. S6** Frontier orbitals and frontier orbital energies of **7**, **8**, and **9** at the optimized S<sub>0</sub> geometry at B3LYP/6-311G(d,p) level.

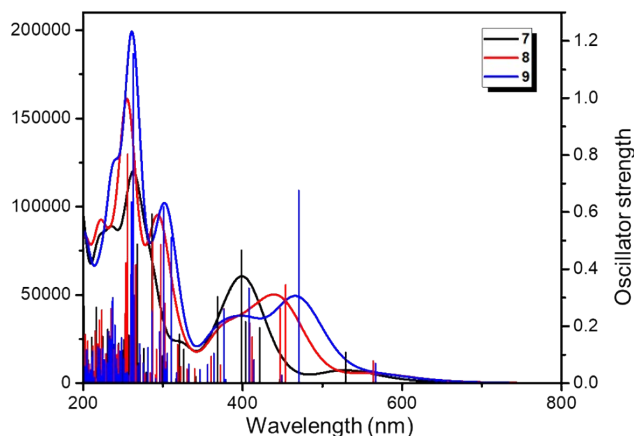

**Fig. S7** Calculated UV-vis spectra of **7**, **8**, and **9** at the CAM-B3LYP/6-311G(d,p) level in CHCl<sub>3</sub> solution.

**Table S2.** TD-DFT singlet excitation energies *E*, excitation wavelengths  $\lambda$ , oscillator strengths *f* > 0.1, and orbital contributions for **7** at the optimized S<sub>0</sub> ground state geometry at the CAM-B3LYP/6-311G(d,p) level in CHCl<sub>3</sub> solution.

| Excited state   | Energy (eV) | Wavelength (nm) | Osc. Strength | Contributions                                                                       |
|-----------------|-------------|-----------------|---------------|-------------------------------------------------------------------------------------|
| S <sub>1</sub>  | 1.9448      | 637.52          | 0.0079        | HOMO→LUMO: 94.8%                                                                    |
| S <sub>2</sub>  | 2.3422      | 529.35          | 0.1072        | HOMO-1→LUMO:79.0%<br>HOMO-2→LUMO:10.2%                                              |
| S <sub>4</sub>  | 2.9424      | 421.37          | 0.1937        | HOMO-3→LUMO:36.8%<br>HOMO-2→LUMO+1:24.4%<br>HOMO-1→LUMO+1:20.5%<br>HOMO-2→LUMO:7.1% |
| S <sub>5</sub>  | 3.0732      | 403.44          | 0.2151        | HOMO-2→LUMO:47.1%<br>HOMO→LUMO+1:31.9%<br>HOMO-2→LUMO+1:6.3%                        |
| S <sub>6</sub>  | 3.1122      | 398.38          | 0.4667        | HOMO-3→LUMO:49.3%<br>HOMO-2→LUMO+1:18.4%<br>HOMO-1→LUMO+1:17.4%                     |
| S <sub>7</sub>  | 3.3651      | 368.44          | 0.3029        | HOMO-4→LUMO:73.0%<br>HOMO→LUMO+1:7.4%<br>HOMO-2→LUMO:6.8%                           |
| S <sub>11</sub> | 3.8608      | 321.14          | 0.1713        | HOMO-4→LUMO+1:51.1%<br>HOMO-3→LUMO+1:16.0%                                          |
| S <sub>17</sub> | 4.3327      | 286.16          | 0.5928        | HOMO→LUMO+2:47.1%<br>HOMO-12→LUMO+1:6.6%                                            |
| S <sub>24</sub> | 4.7201      | 262.67          | 0.4964        | HOMO→LUMO+4:13.2%<br>HOMO-1→LUMO+2:8.0%<br>HOMO→LUMO+5:7.9%<br>HOMO-2→LUMO+3:7.6%   |

**Table S3.** TD-DFT singlet excitation energies *E*, excitation wavelengths  $\lambda$ , oscillator strengths *f* > 0.1, and orbital contributions for **9** at the optimized S<sub>0</sub> ground state geometry at the CAM-B3LYP/6-311G(d,p) level in CHCl<sub>3</sub> solution.

| Excited state  | Energy (eV) | Wavelength (nm) | Osc. Strength | Contributions                                               |
|----------------|-------------|-----------------|---------------|-------------------------------------------------------------|
| S <sub>1</sub> | 1.8856      | 657.53          | 0.0054        | HOMO→LUMO:92.9%                                             |
| S <sub>3</sub> | 2.7311      | 453.97          | 0.3449        | HOMO-2→LUMO:70.1%<br>HOMO→LUMO+1:12.8%                      |
| S <sub>4</sub> | 2.7734      | 447.05          | 0.2628        | HOMO-3→LUMO:31.3%<br>HOMO→LUMO+1:25.8%<br>HOMO-2→LUMO:14.3% |
| S <sub>7</sub> | 3.2899      | 376.86          | 0.2602        | HOMO-4→LUMO:70.7%                                           |

|                 |        |        |        |                                                                                     |
|-----------------|--------|--------|--------|-------------------------------------------------------------------------------------|
|                 |        |        |        | HOMO-5→LUMO:8.4%<br>HOMO-1→LUMO+1:5.9%                                              |
| S <sub>13</sub> | 3.8939 | 318.41 | 0.1350 | HOMO-6→LUMO:60.2%<br>HOMO-5→LUMO+1:10.9%<br>HOMO-4→LUMO+1:7.3%                      |
| S <sub>16</sub> | 4.1687 | 297.42 | 0.4863 | HOMO→LUMO+2:54.6%                                                                   |
| S <sub>19</sub> | 4.3168 | 287.21 | 0.4942 | HOMO-1→LUMO+2:30.4%<br>HOMO→LUMO+4:23.4%<br>HOMO-10→LUMO:6.3%<br>HOMO-1→LUMO+4:5.1% |

**Table S4.** TD-DFT singlet excitation energies  $E$ , excitation wavelengths  $\lambda$ , oscillator strengths  $f > 0.1$ , and orbital contributions for **8** at the optimized  $S_0$  ground state geometry at the CAM-B3LYP/6-311G(d,p) level in  $\text{CHCl}_3$  solution.

| Excited state   | Energy (eV) | Wavelength (nm) | Osc. Strength | Contributions                                                                                           |
|-----------------|-------------|-----------------|---------------|---------------------------------------------------------------------------------------------------------|
| S <sub>1</sub>  | 1.9277      | 643.17          | 0.0054        | HOMO→LUMO:94.9%                                                                                         |
| S <sub>3</sub>  | 2.6369      | 470.19          | 0.6755        | HOMO-2→LUMO: 90.2%                                                                                      |
| S <sub>6</sub>  | 3.0398      | 407.87          | 0.3317        | HOMO-3→LUMO:58.4%<br>HOMO→LUMO+1:31.4%                                                                  |
| S <sub>8</sub>  | 3.2942      | 376.37          | 0.2587        | HOMO-4→LUMO:76.2%                                                                                       |
| S <sub>9</sub>  | 3.4086      | 363.74          | 0.1044        | HOMO-5→LUMO:79.6%                                                                                       |
| S <sub>14</sub> | 3.9888      | 310.83          | 0.5117        | HOMO→LUMO+2:22.1%<br>HOMO→LUMO+3:15.3%<br>HOMO-8→LUMO:12.9%<br>HOMO-1→LUMO+2:8.3%<br>HOMO-1→LUMO+4:6.2% |
| S <sub>15</sub> | 4.0579      | 305.54          | 0.1045        | HOMO-8→LUMO:29.8%<br>HOMO→LUMO+5:12.2%<br>HOMO→LUMO+2:6.8%                                              |
| S <sub>17</sub> | 4.1151      | 301.29          | 0.6180        | HOMO→LUMO+2:26.4%<br>HOMO→LUMO+3:17.0%<br>HOMO-1→LUMO+4:12.1%<br>HOMO-1→LUMO+5:6.1%                     |
| S <sub>20</sub> | 4.3319      | 286.21          | 0.2517        | HOMO-10→LUMO:27.5%<br>HOMO-8→LUMO+1:11.4%<br>HOMO→LUMO+6:9.7%<br>HOMO-2→LUMO+2:8.8%<br>HOMO→LUMO+4:5.1% |

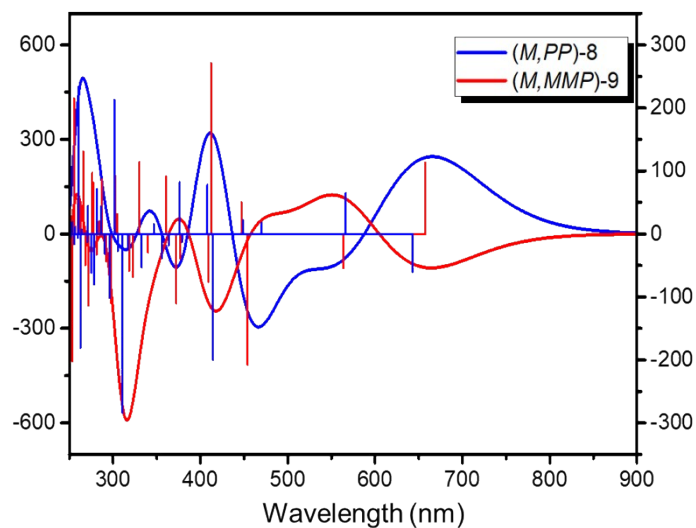

**Fig. S8** Calculated CD spectra of *(M,PP)*-**8**, and *(M,MMP)*-**9** at the CAM-B3LYP/6-311G(d,p) level in  $\text{CHCl}_3$  solution.

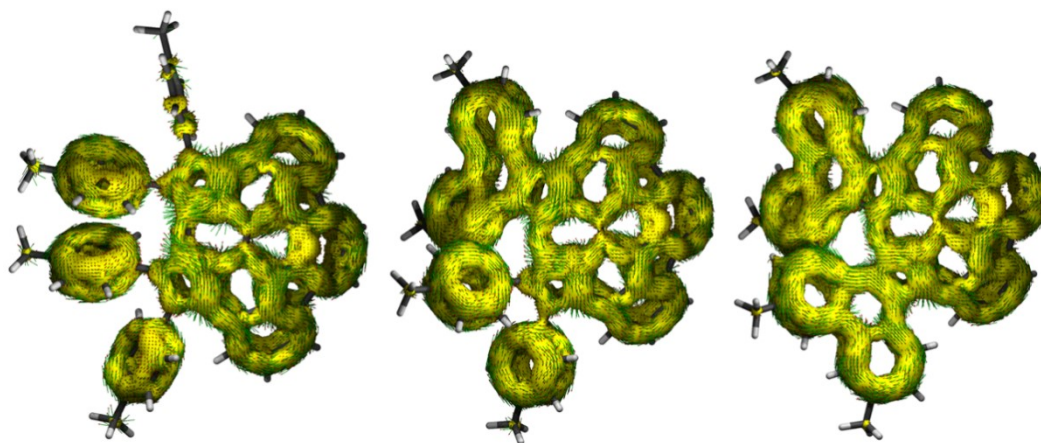

**Fig. S9** ACID plots of **7**, **8**, **9**.

**Table S5.** Cartesian coordinates of optimized structures calculated by B3LYP/6-311G(d,p) level of theory.

| 7 |             |             |             |   |             |             |             |
|---|-------------|-------------|-------------|---|-------------|-------------|-------------|
| C | 14.16500000 | 16.61600000 | 15.03100000 | C | 14.65200000 | 18.38600000 | 11.70600000 |
| C | 14.11500000 | 17.48500000 | 16.09000000 | H | 14.46300000 | 19.21200000 | 11.32400000 |
| C | 14.36200000 | 16.79600000 | 17.36700000 | C | 15.38300000 | 17.46600000 | 10.97700000 |
| C | 14.12400000 | 17.13300000 | 18.74800000 | C | 15.59000000 | 16.23400000 | 11.60100000 |
| C | 13.56800000 | 18.31900000 | 19.27600000 | H | 16.03700000 | 15.56600000 | 11.13200000 |
| H | 13.52200000 | 19.08400000 | 18.74700000 | C | 15.15900000 | 15.96900000 | 12.86800000 |
| C | 13.09100000 | 18.35100000 | 20.56100000 | H | 15.35200000 | 15.14100000 | 13.24400000 |
| H | 12.79200000 | 19.16200000 | 20.90200000 | C | 15.97700000 | 17.73900000 | 9.58700000  |
| C | 13.03200000 | 17.21600000 | 21.39200000 | C | 17.46900000 | 17.61200000 | 9.60200000  |
| H | 12.61200000 | 17.25200000 | 22.22100000 | H | 17.83900000 | 18.24400000 | 10.22300000 |
| C | 13.61200000 | 16.05200000 | 20.94500000 | H | 17.81400000 | 17.78800000 | 8.72300000  |
| C | 13.45000000 | 14.58800000 | 21.30800000 | H | 17.71200000 | 16.72200000 | 9.86900000  |
| C | 12.51000000 | 13.84300000 | 22.01600000 | C | 15.54000000 | 19.08200000 | 9.05000000  |
| H | 12.11700000 | 14.21500000 | 22.77500000 | H | 14.59000000 | 19.07500000 | 8.90800000  |



|   |             |             |             |   |             |             |             |
|---|-------------|-------------|-------------|---|-------------|-------------|-------------|
| C | 12.13900000 | 12.54300000 | 21.61700000 | H | 15.98700000 | 19.25600000 | 8.22000000  |
| H | 11.48700000 | 12.09000000 | 22.10100000 | H | 15.76300000 | 19.76800000 | 9.68400000  |
| C | 12.71800000 | 11.92500000 | 20.53700000 | C | 15.46400000 | 16.65900000 | 8.59600000  |
| C | 12.21700000 | 10.97500000 | 19.45900000 | H | 15.89200000 | 15.82200000 | 8.78700000  |
| C | 11.06700000 | 10.22000000 | 19.33900000 | H | 15.66700000 | 16.92700000 | 7.69800000  |
| H | 10.55800000 | 10.00300000 | 20.08700000 | H | 14.51400000 | 16.56200000 | 8.69500000  |
| C | 10.68900000 | 9.78600000  | 18.05100000 | C | 12.40800000 | 14.22800000 | 13.02600000 |
| H | 9.95500000  | 9.21800000  | 17.98600000 | C | 11.65800000 | 15.38200000 | 13.18900000 |
| C | 11.32900000 | 10.14400000 | 16.89300000 | H | 11.45500000 | 15.68100000 | 14.04700000 |
| H | 11.02500000 | 9.82100000  | 16.07500000 | C | 11.20600000 | 16.10600000 | 12.08100000 |
| C | 12.45600000 | 11.00500000 | 16.94100000 | H | 10.69700000 | 16.87200000 | 12.21700000 |
| C | 12.99400000 | 11.87200000 | 15.90200000 | C | 11.49500000 | 15.71500000 | 10.78800000 |
| C | 12.42600000 | 12.22200000 | 14.58900000 | C | 12.24200000 | 14.55400000 | 10.64100000 |
| C | 12.89700000 | 13.47300000 | 14.20600000 | H | 12.45500000 | 14.25300000 | 9.78600000  |
| C | 13.79400000 | 13.98200000 | 15.27300000 | C | 12.68000000 | 13.82900000 | 11.74500000 |
| C | 14.28300000 | 15.25400000 | 15.61700000 | H | 13.17100000 | 13.05100000 | 11.61100000 |
| C | 14.62100000 | 15.45700000 | 17.01500000 | C | 11.01100000 | 16.54200000 | 9.58700000  |
| C | 14.72500000 | 14.43300000 | 17.95800000 | C | 11.61100000 | 17.95100000 | 9.68300000  |
| C | 14.61700000 | 14.77700000 | 19.28500000 | H | 11.36700000 | 18.34800000 | 10.52300000 |
| C | 14.24700000 | 16.07600000 | 19.68400000 | H | 11.27500000 | 18.49200000 | 8.96400000  |
| C | 14.14200000 | 13.86700000 | 20.30600000 | H | 12.56800000 | 17.89700000 | 9.62200000  |
| C | 13.81100000 | 12.59600000 | 19.92100000 | C | 11.41800000 | 15.96200000 | 8.26600000  |
| C | 13.94000000 | 12.21800000 | 18.55900000 | H | 12.37200000 | 16.01300000 | 8.17400000  |
| C | 14.36800000 | 13.10400000 | 17.55100000 | H | 11.00200000 | 16.45900000 | 7.55700000  |
| C | 13.85900000 | 12.91200000 | 16.25500000 | H | 11.14000000 | 15.04500000 | 8.22000000  |
| C | 12.95000000 | 11.26300000 | 18.26100000 | C | 9.47700000  | 16.65400000 | 9.62000000  |
| C | 13.77700000 | 18.94600000 | 16.01200000 | H | 9.09000000  | 15.77900000 | 9.54200000  |
| C | 14.69300000 | 19.93600000 | 16.30400000 | H | 9.18000000  | 17.20300000 | 8.89100000  |
| H | 15.55700000 | 19.70100000 | 16.55900000 | H | 9.20400000  | 17.05100000 | 10.45100000 |
| C | 14.34500000 | 21.28100000 | 16.22600000 | C | 11.44200000 | 11.40200000 | 13.85200000 |
| H | 14.97800000 | 21.92900000 | 16.43400000 | C | 10.18900000 | 11.89600000 | 13.53400000 |
| C | 13.05900000 | 21.67400000 | 15.83800000 | H | 9.97600000  | 12.77200000 | 13.76200000 |
| C | 12.13500000 | 20.66400000 | 15.58400000 | C | 9.24300000  | 11.11800000 | 12.88600000 |
| H | 11.26200000 | 20.88500000 | 15.34800000 | H | 8.41700000  | 11.48800000 | 12.67600000 |
| C | 12.50500000 | 19.33000000 | 15.68000000 | C | 9.50000000  | 9.79900000  | 12.54400000 |
| H | 11.86600000 | 18.67500000 | 15.51300000 | C | 10.75500000 | 9.30400000  | 12.85000000 |
| C | 12.72400000 | 23.16700000 | 15.71000000 | H | 10.96700000 | 8.42800000  | 12.61800000 |
| C | 13.54900000 | 23.76700000 | 14.57300000 | C | 11.70800000 | 10.09100000 | 13.49800000 |
| H | 14.48200000 | 23.60300000 | 14.73300000 | H | 12.54000000 | 9.72600000  | 13.69400000 |
| H | 13.39300000 | 24.71200000 | 14.52600000 | C | 8.43700000  | 8.94400000  | 11.85300000 |
| H | 13.29300000 | 23.35800000 | 13.74200000 | C | 8.78500000  | 8.70000000  | 10.44200000 |
| C | 11.24100000 | 23.41500000 | 15.40100000 | H | 9.06500000  | 9.52300000  | 10.03600000 |
| H | 11.05100000 | 23.13500000 | 14.50200000 | H | 8.01700000  | 8.35800000  | 9.97900000  |
| H | 11.04600000 | 24.35000000 | 15.49300000 | H | 9.49900000  | 8.06000000  | 10.39600000 |

|   |             |             |             |   |            |             |             |
|---|-------------|-------------|-------------|---|------------|-------------|-------------|
| H | 10.69900000 | 22.91300000 | 16.01300000 | C | 7.07100000 | 9.58900000  | 11.83800000 |
| C | 13.00100000 | 23.89000000 | 17.05200000 | H | 6.68400000 | 9.54400000  | 12.71400000 |
| H | 12.45900000 | 23.50400000 | 17.74200000 | H | 6.50500000 | 9.12600000  | 11.21400000 |
| H | 12.78900000 | 24.82300000 | 16.96300000 | H | 7.15400000 | 10.50800000 | 11.57100000 |
| H | 13.92800000 | 23.79500000 | 17.28200000 | C | 8.29500000 | 7.58300000  | 12.53400000 |
| C | 14.44100000 | 16.90500000 | 13.62600000 | H | 9.15400000 | 7.15700000  | 12.58000000 |
| C | 14.19200000 | 18.12500000 | 12.99100000 | H | 7.69200000 | 7.03400000  | 12.02800000 |
| H | 13.70600000 | 18.77700000 | 13.43800000 | H | 7.95000000 | 7.70400000  | 13.42200000 |

TS-7

|   |             |             |             |   |             |             |             |
|---|-------------|-------------|-------------|---|-------------|-------------|-------------|
| C | 0.71729900  | 0.71772600  | 0.04074400  | C | -0.94200100 | -6.42721300 | 1.98048500  |
| C | -0.71730300 | 0.71772700  | -0.04067800 | C | -3.21950500 | -5.75276500 | 2.81304900  |
| C | -1.38320400 | 2.01522200  | -0.17249700 | C | -8.61229900 | -1.38859300 | -0.15274700 |
| C | -0.68092200 | 3.17612900  | -0.10855800 | C | -8.97120800 | -2.20825600 | 1.10004600  |
| C | 0.68092400  | 3.17612700  | 0.10864200  | C | -9.56647600 | -0.17343900 | -0.22186100 |
| C | 1.38320300  | 2.01521800  | 0.17257100  | C | -8.83364000 | -2.28407200 | -1.39429400 |
| C | -1.31113200 | 4.36675300  | -0.19084200 | H | -1.17999100 | 8.85823300  | -0.11268900 |
| C | -0.67163600 | 5.59756900  | -0.08873100 | H | 1.18002000  | 8.85823000  | 0.11262700  |
| C | 0.67164700  | 5.59756700  | 0.08876800  | H | 4.70806400  | 7.20041600  | 0.34396000  |
| C | 1.31113900  | 4.36675100  | 0.19090400  | H | 6.25857100  | 5.32000300  | 0.43717700  |
| C | -1.52468000 | 6.68273500  | -0.16393000 | H | 5.65333900  | 2.99472200  | 0.42088700  |
| C | -0.73117000 | 7.87120400  | -0.07290100 | H | -5.65333100 | 2.99473800  | -0.42091900 |
| C | 0.73119300  | 7.87120200  | 0.07287000  | H | -6.25855400 | 5.32002200  | -0.43725500 |
| C | 1.52469700  | 6.68273100  | 0.16392300  | H | -4.70804100 | 7.20043100  | -0.34403700 |
| C | 2.65726600  | 4.51107500  | 0.31187200  | H | 4.29119900  | -0.98389500 | -1.71800100 |
| C | -2.65725600 | 4.51107900  | -0.31184000 | H | 6.59245000  | -1.77492200 | -1.75605600 |
| C | 2.94128100  | 5.93994800  | 0.29869400  | H | 7.30495400  | 0.12932800  | 2.02622200  |
| C | 4.29239900  | 6.19863600  | 0.35160200  | H | 5.00483300  | 0.93973700  | 2.04444400  |
| C | 5.20094900  | 5.07996400  | 0.40281700  | H | 3.06115000  | -2.24670000 | 1.43930300  |
| C | 4.85896700  | 3.73048900  | 0.39791400  | H | 3.23469100  | -4.58091600 | 0.77131000  |
| C | 3.48148100  | 3.33866000  | 0.34619800  | H | 0.88354800  | -3.74570600 | -2.72333200 |
| C | -3.48147300 | 3.33867000  | -0.34617300 | H | 0.69672400  | -1.41865900 | -2.03556200 |
| C | -4.85895700 | 3.73050300  | -0.39793100 | H | -3.06112500 | -2.24670700 | -1.43928400 |
| C | -5.20093400 | 5.07997900  | -0.40286300 | H | -3.23464200 | -4.58092700 | -0.77130200 |
| C | -4.29238000 | 6.19864800  | -0.35164500 | H | -0.88358100 | -3.74569100 | 2.72338900  |
| C | -2.94126500 | 5.93995500  | -0.29869800 | H | -0.69677400 | -1.41864500 | 2.03562800  |
| C | 2.77589300  | 2.02515900  | 0.28661300  | H | -4.29126200 | -0.98383200 | 1.71803600  |
| C | -2.77589200 | 2.02516700  | -0.28656600 | H | -6.59252000 | -1.77485800 | 1.75603600  |
| C | 3.08012500  | 0.56198600  | 0.18673200  | H | -7.30489900 | 0.12929900  | -2.02631200 |
| C | 1.90241900  | -0.18949000 | 0.03748300  | H | -5.00478100 | 0.93969900  | -2.04448200 |
| C | -1.90242700 | -0.18948600 | -0.03744100 | H | 9.86767500  | -2.64118600 | 1.42580300  |
| C | -3.08012800 | 0.56199300  | -0.18670200 | H | 8.63861400  | -1.74428500 | 2.32372500  |
| C | 4.46190300  | 0.03865600  | 0.16480000  | H | 8.17330100  | -3.15512200 | 1.36874000  |
| C | 1.88648100  | -1.63890800 | -0.25454500 | H | 10.01346200 | -2.53273400 | -1.03957700 |
| C | -4.46190800 | 0.03866300  | -0.16480000 | H | 8.86098200  | -1.62091300 | -2.01562600 |

|                 |             |             |             |   |              |             |             |
|-----------------|-------------|-------------|-------------|---|--------------|-------------|-------------|
| C               | -1.88649200 | -1.63890400 | 0.25458700  | H | 8.35170000   | -3.10454700 | -1.19118700 |
| C               | 4.94786600  | -0.73679000 | -0.89287600 | H | 9.39605300   | 0.42683300  | 1.11832000  |
| C               | 6.26563900  | -1.18728600 | -0.90833100 | H | 10.60798200  | -0.50912000 | 0.23841600  |
| C               | 7.15474600  | -0.89713800 | 0.13225500  | H | 9.43267600   | 0.47679700  | -0.64704200 |
| C               | 6.65980300  | -0.12059800 | 1.19141100  | H | 3.03901300   | -7.73517800 | -0.92624900 |
| C               | 5.35126500  | 0.34481800  | 1.20630500  | H | 3.95229100   | -6.38727900 | -0.25330600 |
| C               | 2.57712800  | -2.57116400 | 0.52558400  | H | 2.35063900   | -6.78123300 | 0.39157500  |
| C               | 2.67749300  | -3.90496400 | 0.13587200  | H | 1.09216300   | -7.44974600 | -2.34004000 |
| C               | 2.09911600  | -4.36897100 | -1.05098300 | H | 0.45486100   | -5.86566100 | -2.77976900 |
| C               | 1.36505200  | -3.43891500 | -1.80215200 | H | 0.25462900   | -6.46236500 | -1.13193000 |
| C               | 1.25207400  | -2.11113200 | -1.41309800 | H | 2.78513600   | -5.14112300 | -3.60802500 |
| C               | -2.57711600 | -2.57116600 | -0.52555500 | H | 4.19240800   | -5.32556300 | -2.55640100 |
| C               | -2.67746800 | -3.90496800 | -0.13585000 | H | 3.38214100   | -6.75939900 | -3.21162500 |
| C               | -2.09910600 | -4.36897300 | 1.05101600  | H | -3.03866000  | -7.73526600 | 0.92607800  |
| C               | -1.36507600 | -3.43890800 | 1.80220400  | H | -3.95195400  | -6.38746600 | 0.25296700  |
| C               | -1.25210500 | -2.11112200 | 1.41315300  | H | -2.35012500  | -6.78122100 | -0.39159400 |
| C               | -4.94790300 | -0.73675100 | 0.89288400  | H | -1.09220500  | -7.44971000 | 2.34021000  |
| C               | -6.26567700 | -1.18724600 | 0.90830600  | H | -0.45521300  | -5.86561500 | 2.78032400  |
| C               | -7.15474900 | -0.89713700 | -0.13232000 | H | -0.25441400  | -6.46209100 | 1.13246900  |
| C               | -6.65977600 | -0.12061800 | -1.19147800 | H | -2.78567000  | -5.14111300 | 3.60789300  |
| C               | -5.35123800 | 0.34479900  | -1.20634000 | H | -4.19268300  | -5.32574600 | 2.55595500  |
| C               | 8.61229200  | -1.38860200 | 0.15269000  | H | -3.38241000  | -6.75946900 | 3.21141800  |
| C               | 8.83363900  | -2.28405000 | 1.39425700  | H | -10.01349600 | -2.53269600 | 1.03950600  |
| C               | 8.97116800  | -2.20830600 | -1.10008700 | H | -8.35173600  | -3.10448800 | 1.19120000  |
| C               | 9.56647900  | -0.17345200 | 0.22174500  | H | -8.86106400  | -1.62083100 | 2.01557000  |
| C               | 2.29547000  | -5.80390500 | -1.57230800 | H | -10.60797900 | -0.50910300 | -0.23859100 |
| C               | 2.94762300  | -6.72308900 | -0.52262000 | H | -9.39599200  | 0.42684200  | -1.11842900 |
| C               | 0.94195400  | -6.42730700 | -1.98015000 | H | -9.43272400  | 0.47681400  | 0.64693100  |
| C               | 3.21921700  | -5.75269800 | -2.81325700 | H | -8.17335900  | -3.15518500 | -1.36871000 |
| C               | -2.29546500 | -5.80391600 | 1.57231600  | H | -9.86769700  | -2.64114300 | -1.42588400 |
| C               | -2.94730200 | -6.72316200 | 0.52248100  | H | -8.63852800  | -1.74435300 | -2.32377100 |
| <b>(M,PP)-8</b> |             |             |             |   |              |             |             |
| C               | 2.75988100  | 1.87693400  | 1.12567200  | H | -7.31949000  | -2.37275600 | -3.42384100 |
| C               | 3.49142800  | 3.08094800  | 0.76305900  | H | -8.83839000  | -3.02958600 | -2.81321900 |
| C               | 4.68678800  | 3.20216400  | -0.01361500 | H | -7.31433300  | -3.51938600 | -2.07243200 |
| H               | 5.30473200  | 2.33956200  | -0.21233300 | C | -2.79422500  | -1.90673900 | 2.05510300  |
| C               | 5.03488800  | 4.40585700  | -0.59707500 | H | -3.61860400  | -1.22632000 | 2.22707000  |
| H               | 5.93940800  | 4.44431900  | -1.19430700 | C | -2.77623700  | -3.12479400 | 2.72004100  |
| C               | 4.21590400  | 5.56754600  | -0.54150000 | H | -3.60280200  | -3.36544700 | 3.37555200  |
| H               | 4.47507100  | 6.43088700  | -1.14468300 | C | -1.70076900  | -4.00430000 | 2.57171600  |
| C               | 3.06705800  | 5.52460200  | 0.21296600  | C | -0.68662300  | -3.61016100 | 1.69333000  |
| C               | 1.79101800  | 6.32591500  | 0.22557800  | H | 0.15449300   | -4.27180300 | 1.52469500  |
| C               | 1.19474600  | 7.22269100  | -0.67249500 | C | -1.60029000  | -5.34901500 | 3.31229300  |
| H               | 1.80158100  | 7.79238800  | -1.36861600 | C | -0.31872500  | -5.36592000 | 4.17744300  |

|   |             |             |             |   |             |             |             |
|---|-------------|-------------|-------------|---|-------------|-------------|-------------|
| C | -0.22033600 | 7.27487600  | -0.84682200 | H | 0.58148700  | -5.23993400 | 3.57192000  |
| H | -0.59782000 | 7.88014700  | -1.66447400 | H | -0.23312400 | -6.31798000 | 4.71052700  |
| C | -1.07720400 | 6.43316100  | -0.12419600 | H | -0.33795000 | -4.56164700 | 4.91771900  |
| C | -2.37381800 | 5.72283800  | -0.43706500 | C | -1.53949500 | -6.50317300 | 2.28472200  |
| C | -3.32640700 | 5.83153500  | -1.42472200 | H | -2.43763700 | -6.51706300 | 1.66099200  |
| H | -3.38515600 | 6.69903600  | -2.07316500 | H | -1.46792100 | -7.46654400 | 2.79918500  |
| C | -4.20914400 | 4.73534100  | -1.64954300 | H | -0.67395000 | -6.41297200 | 1.62456200  |
| H | -4.96227500 | 4.83801800  | -2.42324000 | C | -2.80681000 | -5.59393600 | 4.23690200  |
| C | -4.09631100 | 3.51947400  | -1.00025600 | H | -2.89104200 | -4.82283100 | 5.00737200  |
| H | -4.73408100 | 2.69901900  | -1.30110900 | H | -2.69120000 | -6.55581200 | 4.74364300  |
| C | -3.09968100 | 3.32799300  | 0.00558300  | H | -3.74701600 | -5.62581400 | 3.67959000  |
| C | -2.57196000 | 2.08846900  | 0.53932800  | C | 0.30963000  | -3.22535900 | -1.04735500 |
| C | -2.86875900 | 0.64583000  | 0.32814500  | H | -0.61408700 | -3.78759300 | -1.11293300 |
| C | -1.77463300 | -0.10635400 | 0.72789700  | C | 1.35659500  | -3.51670100 | -1.94297800 |
| C | -1.75947300 | -1.50362900 | 1.19595900  | C | 2.56681500  | -2.90391100 | -1.68597900 |
| C | -0.69122200 | -2.39477100 | 0.99215000  | H | 3.42609200  | -3.14581300 | -2.29296300 |
| C | 0.39851800  | -2.27604500 | -0.03761300 | C | 2.72127200  | -1.93025300 | -0.67732300 |
| C | 1.58163000  | -1.47528600 | 0.06297700  | C | 1.13493600  | -4.51554200 | -3.08916000 |
| C | 1.71185300  | -0.21418600 | 0.75880900  | C | 2.38964400  | -4.68605700 | -3.96446800 |
| C | 2.94832400  | 0.45207000  | 0.77985600  | H | 2.70257600  | -3.73927500 | -4.41293200 |
| C | 2.80258800  | 4.31055200  | 0.94295200  | H | 2.17716600  | -5.38405700 | -4.77860900 |
| C | 1.50595900  | 4.37427100  | 1.47734200  | H | 3.23098300  | -5.09226200 | -3.39625100 |
| C | 0.90539600  | 5.60335100  | 1.05331700  | C | 0.75839800  | -5.89962700 | -2.51031800 |
| C | -0.46320700 | 5.66013700  | 0.88636200  | H | 1.55764800  | -6.28503800 | -1.87127900 |
| C | -1.22934300 | 4.48585900  | 1.14629900  | H | 0.59485500  | -6.61729500 | -3.32017500 |
| C | -2.37040100 | 4.50448800  | 0.32936700  | H | -0.15625400 | -5.85734200 | -1.91481000 |
| C | -1.33466900 | 2.11673900  | 1.19870400  | C | -0.01574600 | -4.00745100 | -3.98893200 |
| C | -0.69945100 | 0.81033000  | 1.13975300  | H | -0.94911900 | -3.90262700 | -3.43124900 |
| C | 0.68143000  | 0.74115400  | 1.22501900  | H | -0.19341500 | -4.70847800 | -4.81033100 |
| C | 1.41191700  | 1.98269900  | 1.50238000  | H | 0.22763000  | -3.03244100 | -4.41948500 |
| C | 0.77029800  | 3.21859500  | 1.69647200  | C | 4.04304300  | -1.40776700 | -0.35691100 |
| C | -0.64560900 | 3.28701200  | 1.51907000  | C | 4.15350800  | -0.23087000 | 0.42338300  |
| C | -4.15037100 | 0.11051200  | -0.15536900 | C | 5.43503800  | 0.17800600  | 0.85489000  |
| C | -5.37484500 | 0.64130200  | 0.28373400  | H | 5.51942600  | 1.02547600  | 1.52335000  |
| H | -5.37748500 | 1.46407700  | 0.98987200  | C | 6.56590800  | -0.51139700 | 0.48326700  |
| C | -6.58165300 | 0.11422000  | -0.15500500 | H | 7.52695300  | -0.17546700 | 0.85460500  |
| H | -7.50029200 | 0.54992800  | 0.22128900  | C | 6.48931800  | -1.65492300 | -0.34646700 |
| C | -6.63567000 | -0.95746100 | -1.06041100 | C | 5.22903200  | -2.07769700 | -0.73711500 |
| C | -5.41257700 | -1.47530700 | -1.50118400 | H | 5.14040100  | -2.98549000 | -1.31418200 |
| H | -5.39133000 | -2.29564100 | -2.20647800 | C | 7.77951900  | -2.39248200 | -0.74189500 |
| C | -4.19828200 | -0.95749100 | -1.05941100 | C | 8.50108900  | -2.88989100 | 0.53276100  |
| H | -3.27051400 | -1.37632100 | -1.43078000 | H | 8.76672900  | -2.06604500 | 1.19891000  |
| C | -7.99569000 | -1.50631400 | -1.52372000 | H | 9.42450100  | -3.41280400 | 0.26559800  |
| C | -8.79557600 | -0.38074300 | -2.22039100 | H | 7.86770400  | -3.58233400 | 1.09367400  |

|   |             |             |             |   |            |             |             |
|---|-------------|-------------|-------------|---|------------|-------------|-------------|
| H | -8.97586800 | 0.46356700  | -1.55121600 | C | 8.70644900 | -1.42003100 | -1.50883200 |
| H | -9.76811400 | -0.75633000 | -2.55315100 | H | 8.22322100 | -1.05853800 | -2.42060000 |
| H | -8.25850100 | -0.00538800 | -3.09572000 | H | 9.63439700 | -1.92577900 | -1.79267900 |
| C | -8.78906400 | -2.01376500 | -0.29668000 | H | 8.97324600 | -0.55022700 | -0.90440300 |
| H | -8.24717100 | -2.81455600 | 0.21371300  | C | 7.51056800 | -3.60909100 | -1.64572100 |
| H | -9.76153600 | -2.40619000 | -0.60961500 | H | 6.89262700 | -4.35982100 | -1.14572300 |
| H | -8.96907700 | -1.21706900 | 0.42861900  | H | 8.45839100 | -4.08635000 | -1.90830200 |
| C | -7.84820500 | -2.67442900 | -2.51560400 | H | 7.01677500 | -3.32158100 | -2.57799500 |

**TS1-8**

|   |             |             |             |   |             |             |             |
|---|-------------|-------------|-------------|---|-------------|-------------|-------------|
| C | -0.76917400 | 0.65243800  | 0.13168100  | C | -0.79723600 | -5.18686800 | 3.33238800  |
| C | 0.62532100  | 0.77873500  | 0.33561500  | C | -0.52899600 | -6.42518000 | 2.44572600  |
| C | 1.19872000  | 2.11568500  | 0.44371900  | C | -1.96226400 | -5.52085200 | 4.28204200  |
| C | 0.40427600  | 3.20214200  | 0.23421600  | C | 0.45490900  | -4.89076800 | 4.19015500  |
| C | -0.93752100 | 3.07181400  | -0.07170900 | C | -8.15178700 | -2.63096200 | -0.75237100 |
| C | -1.54535200 | 1.85787200  | -0.08672000 | C | -8.06095800 | -3.85522400 | -1.68145300 |
| C | 0.92505200  | 4.44383100  | 0.26127200  | C | -8.62071000 | -3.11626900 | 0.63940300  |
| C | 0.18520800  | 5.60455500  | 0.06412300  | C | -9.20402300 | -1.65986300 | -1.33708200 |
| C | -1.14154500 | 5.47717100  | -0.18363300 | H | 0.36560500  | 8.89815000  | 0.17152000  |
| C | -1.66363200 | 4.19224900  | -0.25803600 | H | -1.96494400 | 8.67286400  | -0.20085000 |
| C | 0.91931300  | 6.76637600  | 0.20957600  | H | -5.28720600 | 6.69797100  | -0.68429500 |
| C | 0.02049800  | 7.87322700  | 0.08400200  | H | -6.65168900 | 4.68320800  | -0.86468100 |
| C | -1.42417400 | 7.73351600  | -0.15082700 | H | -5.84720100 | 2.42674900  | -0.74063300 |
| C | -2.09128900 | 6.47571600  | -0.29705500 | H | 5.35847600  | 3.53461000  | 0.84503500  |
| C | -3.01411700 | 4.20331400  | -0.43083000 | H | 5.71946200  | 5.88323500  | 0.86211400  |
| C | 2.23789700  | 4.71216200  | 0.49550000  | H | 3.99977500  | 7.60226500  | 0.62937800  |
| C | -3.42523100 | 5.60028700  | -0.47931400 | H | 5.38393700  | 1.70415300  | 1.38813700  |
| C | -4.78695200 | 5.73705200  | -0.63238800 | H | 7.57338300  | 0.72007600  | 1.00889300  |
| C | -5.58473300 | 4.54187400  | -0.72695200 | H | 5.74374800  | -2.59158900 | -0.98449600 |
| C | -5.12555200 | 3.22899000  | -0.65169100 | H | 4.17282300  | -3.14410700 | -2.05012500 |
| C | -3.73097200 | 2.96014700  | -0.46408800 | H | 0.05713700  | -3.97916400 | -1.32425300 |
| C | 3.16406100  | 3.62239300  | 0.63531600  | H | 0.77804200  | -4.04738700 | 1.43132600  |
| C | 4.48562800  | 4.16656900  | 0.76292800  | H | -3.09176100 | -3.54646200 | 3.18795300  |
| C | 4.69423600  | 5.54290100  | 0.76079000  | H | -3.43489800 | -1.60206500 | 1.80216900  |
| C | 3.68926600  | 6.56319300  | 0.62383600  | H | -3.54890900 | -1.99604200 | -1.62732700 |
| C | 2.38167300  | 6.16415000  | 0.47161400  | H | -5.65370800 | -3.19663200 | -1.89771300 |
| C | -2.92128200 | 1.71335900  | -0.27241200 | H | -7.57735600 | -0.39320200 | 0.72485300  |
| C | 2.58755000  | 2.23294500  | 0.59272100  | H | -5.47028500 | 0.80052400  | 0.98860200  |
| C | 2.98352500  | 0.77437900  | 0.48861200  | H | 8.65975900  | -0.41227700 | -2.06743500 |
| C | -3.06391000 | 0.21888800  | -0.15056700 | H | 9.20753100  | 0.34281500  | -0.56798200 |
| C | 1.83554000  | -0.05017500 | 0.33481000  | H | 10.10245500 | -1.02285700 | -1.24042600 |
| C | -1.81368100 | -0.38182900 | 0.12624000  | H | 7.75117900  | -2.81604500 | -2.05452900 |
| C | 4.27717200  | 0.18102800  | 0.34956500  | H | 9.20757300  | -3.31557000 | -1.19386500 |
| C | 1.92070100  | -1.38977600 | -0.17202000 | H | 7.62348800  | -3.70593500 | -0.52590800 |
| C | -1.56067800 | -1.68926400 | 0.76462700  | H | 8.99307000  | -0.95737800 | 1.67449000  |

|   |             |             |             |   |              |             |             |
|---|-------------|-------------|-------------|---|--------------|-------------|-------------|
| C | -4.33841300 | -0.50119100 | -0.30344900 | H | 8.29550500   | -2.57979700 | 1.67647900  |
| C | 5.46227300  | 0.79222200  | 0.81438600  | H | 9.88869900   | -2.29832300 | 0.95498700  |
| C | 6.69625800  | 0.22131000  | 0.61360500  | H | 1.03153600   | -5.25088400 | -4.79695300 |
| C | 6.83167500  | -1.00672000 | -0.07562800 | H | 0.04737100   | -4.35876900 | -3.63164100 |
| C | 5.67029500  | -1.62641300 | -0.50697200 | H | 1.28694700   | -3.51341000 | -4.56218000 |
| C | 4.38112200  | -1.08248000 | -0.30308000 | H | 2.47630200   | -6.34648000 | -1.49615400 |
| C | 3.17803400  | -1.80495500 | -0.69794300 | H | 0.75873900   | -6.06885100 | -1.80462400 |
| C | 3.22789000  | -2.90084800 | -1.58831700 | H | 1.74069000   | -6.91303000 | -3.00426400 |
| C | 2.10128600  | -3.62676900 | -1.92231800 | H | 4.25438800   | -5.19827100 | -2.93134400 |
| C | 0.91617600  | -3.32819600 | -1.21228600 | H | 3.41555000   | -5.72253300 | -4.39003500 |
| C | 0.80302900  | -2.27896200 | -0.31445100 | H | 3.77880700   | -4.01083400 | -4.15927600 |
| C | -0.34686300 | -2.41456600 | 0.66676300  | H | 0.31966500   | -6.26808900 | 1.77631500  |
| C | -0.16373600 | -3.51945700 | 1.51664400  | H | -0.30641800  | -7.29735900 | 3.06842100  |
| C | -1.10782600 | -3.97224900 | 2.44151700  | H | -1.40221000  | -6.66048700 | 1.83090600  |
| C | -2.30906200 | -3.26331100 | 2.49639600  | H | -2.87546300  | -5.76830100 | 3.73389200  |
| C | -2.51306600 | -2.15529000 | 1.68918500  | H | -1.69967200  | -6.38767800 | 4.89448200  |
| C | -4.43155100 | -1.64492100 | -1.10593000 | H | -2.18360600  | -4.69234000 | 4.96019900  |
| C | -5.63681000 | -2.32445700 | -1.25751600 | H | 1.33154500   | -4.68683800 | 3.57141900  |
| C | -6.80447800 | -1.90262700 | -0.61164600 | H | 0.29035000   | -4.02126600 | 4.83213800  |
| C | -6.70478000 | -0.75748700 | 0.19430700  | H | 0.68836700   | -5.74770400 | 4.82986500  |
| C | -5.50854800 | -0.06816300 | 0.34139900  | H | -7.76063700  | -3.57546500 | -2.69482700 |
| C | 8.23040900  | -1.60968600 | -0.28514600 | H | -7.35251200  | -4.59882800 | -1.30658900 |
| C | 9.09979900  | -0.61234200 | -1.08678500 | H | -9.03988100  | -4.33726900 | -1.74889100 |
| C | 8.19006500  | -2.93875600 | -1.06060000 | H | -9.58065800  | -3.63520300 | 0.55673300  |
| C | 8.88903600  | -1.87387000 | 1.08939000  | H | -7.89570100  | -3.80911100 | 1.07502100  |
| C | 2.10274500  | -4.76139100 | -2.95941400 | H | -8.74998100  | -2.28562200 | 1.33692300  |
| C | 1.05187400  | -4.45062600 | -4.05072400 | H | -8.89838000  | -1.30206400 | -2.32398800 |
| C | 1.74561900  | -6.10014000 | -2.27154000 | H | -10.16937600 | -2.16460500 | -1.44179400 |
| C | 3.47155600  | -4.92506200 | -3.64431000 | H | -9.35217400  | -0.78763800 | -0.69636600 |

**(P,MP)-8**

|   |             |             |             |   |             |             |             |
|---|-------------|-------------|-------------|---|-------------|-------------|-------------|
| C | -2.95105400 | 0.04575000  | -0.63801900 | C | -2.38929600 | 7.01193700  | 0.53577100  |
| C | -1.65189200 | -0.40196200 | -0.39537400 | C | -2.72109000 | 6.01909000  | -0.39850600 |
| C | -1.28925300 | -1.54938400 | 0.46386800  | C | -3.87578000 | 5.05635800  | -0.57609800 |
| C | -0.10967800 | -2.32124200 | 0.39376700  | C | -5.17123100 | 4.97740200  | -0.12060100 |
| C | 1.07811400  | -2.23165800 | -0.53183000 | C | -5.85853500 | 3.73408500  | -0.24350300 |
| C | 2.08102600  | -1.21683600 | -0.39288200 | C | -5.24974900 | 2.56220600  | -0.65579000 |
| C | 1.80962400  | 0.16210700  | -0.11898100 | C | -3.87353400 | 2.55607200  | -1.04718100 |
| C | 2.82864900  | 1.08292200  | 0.16498100  | C | -2.92001600 | 1.45713400  | -1.10028900 |
| C | -4.18130900 | -0.77651200 | -0.51028900 | H | -5.08103000 | 0.31041100  | 1.11442200  |
| C | -5.19076700 | -0.51682100 | 0.42246900  | H | -7.06854500 | -1.08189600 | 1.25371100  |
| C | -6.32507900 | -1.32245500 | 0.50496700  | H | -5.58136800 | -3.51504500 | -1.95516200 |
| C | -6.50849500 | -2.42004100 | -0.34327500 | H | -3.58931800 | -2.10977700 | -2.08722700 |
| C | -5.49168200 | -2.67615800 | -1.27425100 | H | -8.80271200 | -2.27331800 | -1.88919600 |
| C | -4.35566700 | -1.88083000 | -1.35572900 | H | -7.83501500 | -3.63457500 | -2.46238500 |

|   |             |             |             |   |             |             |             |
|---|-------------|-------------|-------------|---|-------------|-------------|-------------|
| C | -7.74913500 | -3.32791800 | -0.28559100 | H | -9.36195400 | -3.93337700 | -1.62589100 |
| C | -8.47749300 | -3.28927000 | -1.64933700 | H | -8.29987600 | -2.92333300 | 1.80057300  |
| C | -8.74561000 | -2.88887600 | 0.80272100  | H | -9.60731100 | -3.56167200 | 0.80356400  |
| C | -7.31096500 | -4.77927900 | 0.01987400  | H | -9.11872500 | -1.87602000 | 0.62824400  |
| C | -2.17479200 | -1.84570700 | 1.52393900  | H | -6.79419200 | -4.83624000 | 0.98169300  |
| C | -1.96589400 | -2.86344900 | 2.43216000  | H | -8.18363000 | -5.43834800 | 0.06208100  |
| C | -0.82142100 | -3.66521900 | 2.35689900  | H | -6.63564300 | -5.16897600 | -0.74505000 |
| C | 0.07626400  | -3.35519700 | 1.34102500  | H | -3.05168800 | -1.23088400 | 1.64792700  |
| C | -0.58769600 | -4.79385700 | 3.37380200  | H | -2.69819200 | -3.01505800 | 3.21703900  |
| C | -0.52869400 | -4.19538900 | 4.79879200  | H | 0.99634500  | -3.91595100 | 1.26603500  |
| C | 0.72498600  | -5.55606900 | 3.11819800  | H | -1.45438000 | -3.67751500 | 5.05981100  |
| C | -1.75652100 | -5.80326000 | 3.29147100  | H | 0.29175400  | -3.47812300 | 4.88608500  |
| C | 1.40136100  | -3.37941800 | -1.23346100 | H | -0.36934500 | -4.98754700 | 5.53701800  |
| C | 2.70287200  | -3.64999400 | -1.71708100 | H | 0.73881000  | -6.02166400 | 2.12907300  |
| C | 3.70536900  | -2.78264300 | -1.32926800 | H | 0.83664500  | -6.35177100 | 3.85975900  |
| C | 3.43498500  | -1.57564500 | -0.64027400 | H | 1.59779800  | -4.90307800 | 3.20122800  |
| C | 2.95366800  | -4.90533100 | -2.56791200 | H | -1.81746400 | -6.24867600 | 2.29474300  |
| C | 4.42158900  | -5.02525500 | -3.01540800 | H | -1.61358900 | -6.61008300 | 4.01705800  |
| C | 2.59361900  | -6.17188600 | -1.75591800 | H | -2.71730500 | -5.32907300 | 3.50427700  |
| C | 2.06676900  | -4.83983600 | -3.83315700 | H | 0.62752600  | -4.12952500 | -1.34735800 |
| C | 4.50088200  | -0.67035500 | -0.23006700 | H | 4.72644600  | -3.00001100 | -1.60245900 |
| C | 4.19513500  | 0.65853700  | 0.19275700  | H | 4.73730300  | -4.16026600 | -3.60488200 |
| C | 5.27479400  | 1.52657600  | 0.48100800  | H | 4.54306500  | -5.91414600 | -3.64013000 |
| C | 6.57914600  | 1.09739200  | 0.43552600  | H | 5.10051600  | -5.12846500 | -2.16437800 |
| C | 6.90330100  | -0.23575300 | 0.09128800  | H | 3.20661300  | -6.24340800 | -0.85320800 |
| C | 5.85604300  | -1.07600500 | -0.24515800 | H | 1.54472600  | -6.17751500 | -1.45130700 |
| C | 8.37297300  | -0.68645200 | 0.09613700  | H | 2.76861100  | -7.06923500 | -2.35733700 |
| C | 8.95895600  | -0.50288600 | 1.51592900  | H | 2.31058500  | -3.96009700 | -4.43466700 |
| C | 9.17674400  | 0.17603300  | -0.90549200 | H | 2.22092100  | -5.72949700 | -4.45154200 |
| C | 8.53885300  | -2.16361700 | -0.30340700 | H | 1.00525900  | -4.78727100 | -3.58096200 |
| C | 0.28412900  | 3.32256200  | -1.14374600 | H | 5.07313100  | 2.55969800  | 0.72034000  |
| C | -1.06851400 | 3.04226400  | -1.49503200 | H | 7.36716500  | 1.80359300  | 0.66919700  |
| C | -1.55893100 | 1.74886100  | -1.27879800 | H | 6.07618800  | -2.09853100 | -0.51083100 |
| C | -0.71857500 | 0.65723800  | -0.80423500 | H | 8.91239100  | 0.53801800  | 1.84378500  |
| C | 0.62402200  | 0.90509400  | -0.57621700 | H | 10.00848200 | -0.81206800 | 1.53559200  |
| C | 1.08444400  | 2.28192100  | -0.67161500 | H | 8.41216000  | -1.10773000 | 2.24434100  |
| C | 1.65924400  | 4.82624100  | 0.15217300  | H | 9.13956600  | 1.23767000  | -0.65158500 |
| C | 0.64319200  | 4.60992300  | -0.78905800 | H | 8.78590700  | 0.06111700  | -1.92004500 |
| C | -0.31507600 | 5.66157100  | -0.68548200 | H | 10.22770900 | -0.12875600 | -0.90853100 |
| C | -1.62328600 | 5.40175600  | -1.03568600 | H | 8.01470300  | -2.83276500 | 0.38437900  |
| C | -1.97590500 | 4.08754900  | -1.47022100 | H | 8.17343600  | -2.35485200 | -1.31607100 |
| C | -3.32119000 | 3.86076500  | -1.15983500 | H | 9.59832100  | -2.43205700 | -0.28041600 |
| C | 2.28120300  | 2.46911700  | 0.03467200  | H | 4.02221500  | 3.44370700  | 2.15418400  |
| C | 2.53282200  | 3.78840500  | 0.58764000  | H | 3.76490800  | 5.59749000  | 3.20980500  |

|              |             |             |             |   |             |             |             |
|--------------|-------------|-------------|-------------|---|-------------|-------------|-------------|
| C            | 3.33117900  | 4.15195400  | 1.71595800  | H | 1.99507500  | 7.19109400  | 2.58418100  |
| C            | 3.15812700  | 5.37522000  | 2.33881300  | H | -0.87269400 | 7.94110000  | 1.74781100  |
| C            | 2.15747500  | 6.31696900  | 1.96305500  | H | -3.16315900 | 7.51497000  | 1.10634300  |
| C            | 1.37031900  | 6.04322000  | 0.86753400  | H | -5.66880500 | 5.81550000  | 0.35509800  |
| C            | 0.03301300  | 6.54166600  | 0.36125900  | H | -6.89856100 | 3.69305200  | 0.06177900  |
| C            | -1.03411100 | 7.26571300  | 0.91402900  | H | -5.82164100 | 1.64591000  | -0.65114800 |
| <b>TS2-8</b> |             |             |             |   |             |             |             |
| C            | 1.62541200  | -2.30045100 | -1.02436400 | C | -7.34737200 | -2.44770200 | 2.65404800  |
| C            | 2.50355800  | -3.29620300 | -1.48111200 | C | -8.62061100 | -1.74820800 | 2.12373100  |
| C            | 3.88558600  | -3.34960500 | -1.26758700 | C | -7.29287300 | -2.25132300 | 4.18002300  |
| C            | 4.42651200  | -2.37589300 | -0.45040500 | C | -7.43978000 | -3.96452900 | 2.36657000  |
| C            | 3.65643000  | -1.28210700 | -0.03957500 | C | -1.42882700 | -6.25043800 | -1.41969100 |
| C            | 4.27762500  | -0.23577400 | 0.76401800  | C | -1.21643200 | -7.27430100 | -0.28027500 |
| C            | 5.36031400  | -0.51311000 | 1.61870100  | C | -0.51221900 | -6.63739600 | -2.59383900 |
| C            | 5.93240400  | 0.44155100  | 2.45193000  | C | -2.89439500 | -6.32920300 | -1.90956000 |
| C            | 5.36513600  | 1.72982000  | 2.43371200  | H | 2.09818300  | -4.14807000 | -1.99428400 |
| C            | 4.31334100  | 2.03989600  | 1.59333700  | H | 5.47188600  | -2.40155100 | -0.18304500 |
| C            | 3.76499300  | 1.08739500  | 0.71321000  | H | 5.72416500  | -1.53134400 | 1.66562000  |
| C            | 2.65280600  | 1.31605200  | -0.16700500 | H | 5.72991400  | 2.49666100  | 3.10404400  |
| C            | 2.13719800  | 2.54892700  | -0.81257800 | H | 3.86172600  | 3.01741400  | 1.66346700  |
| C            | 2.44620900  | 3.97251100  | -0.75428100 | H | 4.42617700  | 4.16131300  | 0.15638600  |
| C            | 3.52101100  | 4.67833400  | -0.12455900 | H | 4.26064000  | 6.52783200  | 0.61344600  |
| C            | 3.42521300  | 6.03444700  | 0.12884700  | H | 2.18893300  | 7.82191100  | 0.21244500  |
| C            | 2.25830900  | 6.80305600  | -0.15247100 | H | -0.89999300 | 8.16458200  | 0.07634300  |
| C            | 1.24289200  | 6.20715200  | -0.86206300 | H | -3.22151800 | 7.48730900  | 0.14286000  |
| C            | 1.44922400  | 4.84023000  | -1.27020500 | H | -5.53809000 | 5.55130700  | 0.55374200  |
| C            | 0.30066400  | 4.38092300  | -1.92686700 | H | -6.49941700 | 3.36576900  | 1.17832500  |
| C            | -0.69486300 | 5.39713700  | -1.85911100 | H | -5.42951100 | 1.26446100  | 0.61823400  |
| C            | -0.20834900 | 6.51737100  | -1.14726000 | H | -3.16298700 | -0.24542100 | 2.51690100  |
| C            | -1.18279200 | 7.30725800  | -0.52565700 | H | -5.09856200 | -1.13869100 | 3.70597500  |
| C            | -2.55543600 | 6.90751200  | -0.48771500 | H | -6.78079300 | -2.42819700 | -0.02879700 |
| C            | -2.98904100 | 5.71209900  | -1.07390800 | H | -4.84328600 | -1.52351900 | -1.20859100 |
| C            | -2.02047200 | 5.01541800  | -1.83363200 | H | -2.49077000 | -2.54708600 | 1.16484300  |
| C            | -2.33504400 | 3.62655000  | -1.89852200 | H | -2.62137400 | -4.90676400 | 0.71413700  |
| C            | -3.52629500 | 3.41292300  | -1.18257100 | H | 0.49643300  | -4.46065000 | -2.11968200 |
| C            | -4.02944700 | 4.67935200  | -0.71709200 | H | 4.34434600  | -5.87738000 | -0.21787700 |
| C            | -5.10997400 | 4.64686600  | 0.13509200  | H | 4.81740600  | -6.67164800 | -1.72933300 |
| C            | -5.63095200 | 3.38216300  | 0.52892300  | H | 3.17961000  | -6.04199000 | -1.53417400 |
| C            | -5.03295300 | 2.17855000  | 0.20033500  | H | 4.87830400  | -3.55146000 | -3.84396300 |
| C            | -3.87669600 | 2.15003200  | -0.63829800 | H | 5.11362600  | -5.30727700 | -3.86239000 |
| C            | -2.89305700 | 1.09318500  | -0.81193900 | H | 3.48970600  | -4.63201400 | -3.70438700 |
| C            | -2.70684300 | -0.21616700 | -0.16732200 | H | 6.61706200  | -3.41317400 | -1.95149800 |
| C            | -3.84611900 | -0.82772300 | 0.56553300  | H | 6.41571500  | -4.40564300 | -0.49636800 |
| C            | -3.95434800 | -0.73008700 | 1.95548200  | H | 6.76306700  | -5.16986800 | -2.04568300 |



|                 |             |             |             |   |             |             |             |
|-----------------|-------------|-------------|-------------|---|-------------|-------------|-------------|
| C               | -5.06300200 | -1.24129700 | 2.62932400  | H | 5.80680100  | -0.68949400 | 4.97922500  |
| C               | -6.11045600 | -1.86826600 | 1.94538900  | H | 7.46103100  | -1.32139600 | 5.03225800  |
| C               | -5.99553600 | -1.95408400 | 0.54916200  | H | 6.31155500  | -1.94332100 | 3.84338800  |
| C               | -4.89564500 | -1.44223400 | -0.12877000 | H | 8.62620300  | 0.28265700  | 1.82478800  |
| C               | -1.81119200 | -2.96113700 | 0.44104700  | H | 9.11711000  | -0.75225400 | 3.17610600  |
| C               | -1.90915000 | -4.30314200 | 0.16452300  | H | 7.99532300  | -1.36155600 | 1.95572400  |
| C               | -1.15423600 | -4.83399900 | -0.89351100 | H | 7.96273600  | 2.06792700  | 3.55936800  |
| C               | -0.14030800 | -4.02254100 | -1.37388700 | H | 6.83921300  | 1.65258300  | 4.86587600  |
| C               | 0.16098800  | -2.69948100 | -0.93750600 | H | 8.45091100  | 0.93955100  | 4.82507800  |
| C               | -0.93170800 | -2.07127100 | -0.23058000 | H | -8.74287100 | -1.88733500 | 1.04729700  |
| C               | -1.40267500 | -0.68972200 | -0.38478500 | H | -9.50959800 | -2.15453400 | 2.61575000  |
| C               | -0.69077600 | 0.38127200  | -1.12045400 | H | -8.58542700 | -0.67313000 | 2.32003200  |
| C               | -1.68808600 | 1.37362500  | -1.46931900 | H | -6.42784800 | -2.75101900 | 4.62438800  |
| C               | -1.36756000 | 2.63471100  | -1.98693400 | H | -8.19000300 | -2.67780300 | 4.63651700  |
| C               | 0.00764000  | 3.03014700  | -1.99086600 | H | -7.25551700 | -1.19328200 | 4.45320300  |
| C               | 0.95544300  | 2.14242800  | -1.46202800 | H | -6.55285100 | -4.48596300 | 2.73676500  |
| C               | 0.63047800  | 0.76054200  | -1.14276700 | H | -8.31700400 | -4.39210300 | 2.86171400  |
| C               | 1.82912100  | 0.22078800  | -0.49954700 | H | -7.52710800 | -4.17057900 | 1.29741300  |
| C               | 2.29059800  | -1.13535100 | -0.45976700 | H | -0.18657300 | -7.24251600 | 0.08538100  |
| C               | 4.71029200  | -4.49654400 | -1.87697200 | H | -1.42082400 | -8.28840200 | -0.63765800 |
| C               | 4.23047900  | -5.85116000 | -1.30493300 | H | -1.87799500 | -7.08137800 | 0.56727100  |
| C               | 4.53367400  | -4.49524900 | -3.41312700 | H | 0.54007000  | -6.66932700 | -2.29779300 |
| C               | 6.21246800  | -4.35425800 | -1.56951200 | H | -0.77885300 | -7.63459700 | -2.95408500 |
| C               | 7.10036500  | 0.05737200  | 3.37885500  | H | -0.61415800 | -5.94501800 | -3.43413400 |
| C               | 6.63990200  | -1.04145500 | 4.36493200  | H | -3.60009400 | -6.09765800 | -1.10869700 |
| C               | 8.27773200  | -0.47651300 | 2.53026000  | H | -3.07051700 | -5.62190700 | -2.72454000 |
| C               | 7.61078700  | 1.25541500  | 4.20090500  | H | -3.12002000 | -7.33545100 | -2.27629900 |
| <b>(P,MM)-8</b> |             |             |             |   |             |             |             |
| C               | 2.77772000  | 1.85509100  | -1.12268600 | H | -7.23896900 | -3.54863000 | 1.56636200  |
| C               | 3.52177100  | 3.05063000  | -0.75745300 | H | -8.99842200 | -3.40618700 | 1.49691300  |
| C               | 4.71714600  | 3.15788900  | 0.02123800  | H | -8.02277300 | -3.08235900 | 0.05422700  |
| H               | 5.32531000  | 2.28836000  | 0.21994300  | C | -2.81482900 | -1.86643700 | -2.06829100 |
| C               | 5.07746400  | 4.35703000  | 0.60665600  | H | -3.63129000 | -1.17674100 | -2.24110700 |
| H               | 5.98140800  | 4.38490800  | 1.20534900  | C | -2.80877400 | -3.08376600 | -2.73482300 |
| C               | 4.27130800  | 5.52765200  | 0.55116500  | H | -3.63650700 | -3.31450500 | -3.39241400 |
| H               | 4.53893000  | 6.38741900  | 1.15576200  | C | -1.74346900 | -3.97529300 | -2.58521100 |
| C               | 3.12323900  | 5.49811000  | -0.20512600 | C | -0.72683900 | -3.59341900 | -1.70422800 |
| C               | 1.85602900  | 6.31328900  | -0.21867300 | H | 0.10659700  | -4.26449000 | -1.53473900 |
| C               | 1.26824200  | 7.21539300  | 0.67965300  | C | -1.65627900 | -5.32021200 | -3.32709000 |
| H               | 1.88022800  | 7.77759800  | 1.37735700  | C | -0.37322200 | -5.35028700 | -4.18964000 |
| C               | -0.14642500 | 7.28268800  | 0.85204500  | H | 0.52707900  | -5.23467600 | -3.58218000 |
| H               | -0.51849700 | 7.89096700  | 1.66994700  | H | -0.29691900 | -6.30273400 | -4.72344200 |
| C               | -1.01132100 | 6.45118600  | 0.12715600  | H | -0.38215600 | -4.54518000 | -4.92920900 |
| C               | -2.31591900 | 5.75449500  | 0.43739300  | C | -1.61028800 | -6.47608000 | -2.30064600 |

|   |             |             |             |   |             |             |             |
|---|-------------|-------------|-------------|---|-------------|-------------|-------------|
| C | -3.26838800 | 5.87226900  | 1.42410200  | H | -2.50977800 | -6.48069600 | -1.67873100 |
| H | -3.31843800 | 6.73950500  | 2.07362800  | H | -1.54837100 | -7.43962700 | -2.81603200 |
| C | -4.16309100 | 4.78536800  | 1.64650900  | H | -0.74509500 | -6.39620700 | -1.63868900 |
| H | -4.91579300 | 4.89507000  | 2.41966700  | C | -2.86355000 | -5.55087900 | -4.25435700 |
| C | -4.06279100 | 3.56926800  | 0.99561700  | H | -2.93760600 | -4.77823000 | -5.02432600 |
| H | -4.70959200 | 2.75532400  | 1.29474000  | H | -2.75760400 | -6.51354700 | -4.76170300 |
| C | -3.06732500 | 3.36822500  | -0.00955100 | H | -3.80517900 | -5.57277400 | -3.69897400 |
| C | -2.55270000 | 2.12370000  | -0.54472500 | C | 0.26813700  | -3.22320000 | 1.03893600  |
| C | -2.86580800 | 0.68381900  | -0.33723300 | H | -0.66161700 | -3.77573300 | 1.10177200  |
| C | -1.77876800 | -0.07936500 | -0.73587800 | C | 1.31002100  | -3.52685200 | 1.93639800  |
| C | -1.77762600 | -1.47594000 | -1.20626900 | C | 2.52730100  | -2.92681700 | 1.68265800  |
| C | -0.71957300 | -2.37901400 | -1.00144800 | H | 3.38266700  | -3.17871700 | 2.29110600  |
| C | 0.36927700  | -2.27352900 | 0.03068600  | C | 2.69431800  | -1.95366200 | 0.67550800  |
| C | 1.56114300  | -1.48544200 | -0.06644400 | C | 1.07511100  | -4.52461200 | 3.08088400  |
| C | 1.70633000  | -0.22494600 | -0.76040000 | C | 2.32595000  | -4.70966300 | 3.95877400  |
| C | 2.95002400  | 0.42783400  | -0.77835600 | H | 2.64812900  | -3.76681800 | 4.40898000  |
| C | 2.84666200  | 4.28788500  | -0.93695500 | H | 2.10411700  | -5.40622300 | 4.77164800  |
| C | 1.55160300  | 4.36637800  | -1.47321500 | H | 3.16409300  | -5.12433900 | 3.39195800  |
| C | 0.96382200  | 5.60140700  | -1.04858600 | C | 0.68497500  | -5.90386400 | 2.49955500  |
| C | -0.40433400 | 5.67285000  | -0.88353600 | H | 1.48146700  | -6.29711300 | 1.86185200  |
| C | -1.18282000 | 4.50728700  | -1.14603500 | H | 0.51186600  | -6.62068800 | 3.30817100  |
| C | -2.32476500 | 4.53717600  | -0.33066100 | H | -0.22779000 | -5.85099400 | 1.90200300  |
| C | -1.31394900 | 2.13955500  | -1.20180700 | C | -0.07202500 | -4.00519700 | 3.97870800  |
| C | -0.69303000 | 0.82625500  | -1.14392100 | H | -1.00294900 | -3.88967300 | 3.41903700  |
| C | 0.68717900  | 0.74216500  | -1.22701300 | H | -0.25909600 | -4.70521200 | 4.79888600  |
| C | 1.43158300  | 1.97602100  | -1.50141200 | H | 0.18084900  | -3.03335500 | 4.41094200  |
| C | 0.80373100  | 3.21906600  | -1.69486700 | C | 4.02229900  | -1.44516400 | 0.35825900  |
| C | -0.61161600 | 3.30266100  | -1.51946800 | C | 4.14702400  | -0.26865700 | -0.42048700 |
| C | -4.15426500 | 0.16070700  | 0.14122300  | C | 5.43373100  | 0.12670200  | -0.84916700 |
| C | -5.36974600 | 0.70821500  | -0.28959200 | H | 5.52857500  | 0.97392000  | -1.51654000 |
| H | -5.36401100 | 1.53768300  | -0.98785200 | C | 6.55633000  | -0.57539300 | -0.47623900 |
| C | -6.58874500 | 0.19236300  | 0.14483300  | H | 7.52167200  | -0.24953600 | -0.84539100 |
| H | -7.49719500 | 0.64646500  | -0.22851100 | C | 6.46575100  | -1.71894400 | 0.35204700  |
| C | -6.65321200 | -0.88404700 | 1.03637400  | C | 5.20021500  | -2.12839300 | 0.73990900  |
| C | -5.43105300 | -1.42201300 | 1.47108700  | H | 5.10066000  | -3.03580700 | 1.31580500  |
| H | -5.42522800 | -2.25128100 | 2.16936900  | C | 7.74711400  | -2.47095600 | 0.74898200  |
| C | -4.21362300 | -0.91901900 | 1.03699300  | C | 8.46581700  | -2.97436500 | -0.52493500 |
| H | -3.29036400 | -1.35233900 | 1.40275400  | H | 8.74160700  | -2.15251700 | -1.18942200 |
| C | -7.97929900 | -1.47671400 | 1.54195000  | H | 9.38302400  | -3.50753000 | -0.25666800 |
| C | -8.04253700 | -1.35699200 | 3.08268900  | H | 7.82613400  | -3.65920000 | -1.08803600 |
| H | -7.99084000 | -0.31042300 | 3.39498100  | C | 8.68296700  | -1.50961500 | 1.51908800  |
| H | -8.98045300 | -1.77808100 | 3.45766400  | H | 8.20181300  | -1.14407400 | 2.43034000  |
| H | -7.22097300 | -1.89062100 | 3.56574200  | H | 9.60478700  | -2.02576700 | 1.80416800  |
| C | -9.20536200 | -0.75451900 | 0.95425200  | H | 8.96043800  | -0.64197100 | 0.91635400  |

|                  |              |             |             |   |             |             |             |
|------------------|--------------|-------------|-------------|---|-------------|-------------|-------------|
| H                | -9.23665500  | -0.82741600 | -0.13621000 | C | 7.46325700  | -3.68583100 | 1.65057700  |
| H                | -10.12006200 | -1.21127500 | 1.34138200  | H | 6.83809300  | -4.42907400 | 1.14837800  |
| H                | -9.22435200  | 0.30387700  | 1.22792100  | H | 8.40533100  | -4.17376300 | 1.91421100  |
| C                | -8.06075500  | -2.96831800 | 1.14093900  | H | 6.97089300  | -3.39424000 | 2.58233900  |
| <i>(M,MMP)-9</i> |              |             |             |   |             |             |             |
| C                | 0.33682100   | -2.27280400 | 0.27991300  | C | -0.95977600 | -2.26733200 | -0.49786700 |
| C                | 0.32399600   | -3.24406000 | 1.27713300  | C | -2.00981200 | -1.30514900 | -0.38627400 |
| H                | -0.62894500  | -3.70765300 | 1.49836800  | C | -1.80932200 | 0.09975100  | -0.20597400 |
| C                | 1.46621400   | -3.67047000 | 1.97958400  | C | -0.66605200 | 0.90163600  | -0.68294900 |
| C                | 2.67455200   | -3.16707200 | 1.54201700  | C | -1.19809000 | 2.26000800  | -0.74284200 |
| H                | 3.59211100   | -3.51128300 | 1.99454900  | C | -0.45891800 | 3.36012600  | -1.18161700 |
| C                | 2.75690100   | -2.16926400 | 0.55052800  | C | 0.91524000  | 3.17247800  | -1.50762500 |
| C                | 4.05673500   | -1.73862400 | 0.05244700  | C | 1.46994100  | 1.89512400  | -1.34657600 |
| C                | 5.22435500   | -2.51736800 | 0.22497200  | C | 0.68484700  | 0.72021900  | -0.94846800 |
| H                | 5.14327900   | -3.44648500 | 0.76826400  | C | 1.69546400  | -0.31422500 | -0.64866700 |
| C                | 6.44769100   | -2.16980100 | -0.32505800 | C | 1.56177600  | -1.58536400 | 0.01472500  |
| C                | 6.50130600   | -0.98950100 | -1.10339200 | C | 1.32996200  | -4.68181400 | 3.12840900  |
| H                | 7.42554400   | -0.70515800 | -1.59261100 | C | 0.41010800  | -4.08627000 | 4.21980400  |
| C                | 5.38978300   | -0.19814500 | -1.27796000 | H | 0.83083800  | -3.16033800 | 4.62089800  |
| H                | 5.44968000   | 0.67625300  | -1.91329800 | H | -0.58511500 | -3.85915400 | 3.83120200  |
| C                | 4.15175200   | -0.53401400 | -0.68578000 | H | 0.29381800  | -4.79429200 | 5.04620700  |
| C                | 2.96732800   | 0.25186600  | -0.84055700 | C | 0.71097300  | -5.99654600 | 2.59886400  |
| C                | 2.84429700   | 1.68683300  | -1.15502600 | H | 0.60747000  | -6.72104300 | 3.41250900  |
| C                | 3.70701300   | 2.83394400  | -0.91367700 | H | -0.28037900 | -5.83657200 | 2.16931900  |
| C                | 4.98982300   | 2.87068100  | -0.28261200 | H | 1.34405600  | -6.44182500 | 1.82635200  |
| H                | 5.55615400   | 1.96340400  | -0.13203200 | C | 2.68722300  | -5.01602800 | 3.77308500  |
| C                | 5.49537400   | 4.05327000  | 0.22563900  | H | 2.53886700  | -5.71908700 | 4.59702400  |
| H                | 6.46240300   | 4.02909500  | 0.71615500  | H | 3.37214100  | -5.48518400 | 3.06128400  |
| C                | 4.76984200   | 5.27692400  | 0.23142600  | H | 3.17233000  | -4.12529900 | 4.18136200  |
| H                | 5.16518000   | 6.12684800  | 0.77706300  | C | 7.71478600  | -3.02461400 | -0.15528300 |
| C                | 3.54156200   | 5.31484600  | -0.38701000 | C | 7.47612100  | -4.26542100 | 0.72384300  |
| C                | 3.10160400   | 4.11179700  | -1.04587000 | H | 8.40841600  | -4.82741000 | 0.82436200  |
| C                | 1.76054300   | 4.26851600  | -1.42884200 | H | 7.14515000  | -3.99319800 | 1.72982100  |
| C                | 1.31107400   | 5.55182100  | -0.98595400 | H | 6.73305500  | -4.93796400 | 0.28682400  |
| C                | 2.33801400   | 6.21808600  | -0.28314200 | C | 8.20327300  | -3.50423100 | -1.54239800 |
| C                | 1.91514200   | 7.18337900  | 0.64200400  | H | 9.10829100  | -4.11030200 | -1.43670100 |
| H                | 2.63641300   | 7.71785600  | 1.25151400  | H | 7.44066800  | -4.11393900 | -2.03431500 |
| C                | 0.53516500   | 7.35871500  | 0.96111800  | H | 8.43915900  | -2.66724200 | -2.20331000 |
| H                | 0.29785100   | 8.01407400  | 1.79274400  | C | 8.81972400  | -2.17037700 | 0.50987800  |
| C                | -0.46034500  | 6.57554400  | 0.36002000  | H | 9.73287900  | -2.76080400 | 0.63237700  |
| C                | -0.02300400  | 5.72755900  | -0.68087200 | H | 9.06992600  | -1.29121300 | -0.08806300 |
| C                | -0.90863000  | 4.61801500  | -0.82068600 | H | 8.50321100  | -1.82431300 | 1.49759300  |
| C                | -1.95948500  | 4.76109100  | 0.09723500  | C | -8.31791500 | -1.10049500 | 0.23406700  |
| C                | -1.77211000  | 5.98842500  | 0.82604700  | C | -9.18426800 | -0.36729100 | -0.81719200 |

|   |             |             |             |   |              |             |             |
|---|-------------|-------------|-------------|---|--------------|-------------|-------------|
| C | -2.59467700 | 6.19976400  | 1.90921800  | H | -10.21606200 | -0.72942000 | -0.77580100 |
| H | -2.50417400 | 7.07949200  | 2.53705300  | H | -9.20413600  | 0.71170800  | -0.64896900 |
| C | -3.52746900 | 5.18510500  | 2.26567800  | H | -8.80253000  | -0.54126200 | -1.82678500 |
| H | -4.16031600 | 5.35469500  | 3.12995200  | C | -8.89174700  | -0.83501600 | 1.64584700  |
| C | -3.59882900 | 3.95688100  | 1.63307100  | H | -9.92172400  | -1.19890900 | 1.71084900  |
| H | -4.23880100 | 3.19557400  | 2.05869500  | H | -8.30070500  | -1.34777800 | 2.40950100  |
| C | -2.76269000 | 3.66332600  | 0.51138800  | H | -8.89895100  | 0.23005000  | 1.88812400  |
| C | -2.41207600 | 2.37100100  | -0.05005600 | C | -8.40644100  | -2.61203600 | -0.04268600 |
| C | -2.87758100 | 0.96416900  | 0.07940400  | H | -9.44846900  | -2.93577400 | 0.02379500  |
| C | -4.21921300 | 0.47066000  | 0.15107500  | H | -8.04751700  | -2.86415500 | -1.04428100 |
| C | -5.34191400 | 1.30016000  | 0.38673300  | H | -7.83391300  | -3.19338600 | 0.68520600  |
| H | -5.19645000 | 2.35909500  | 0.53354900  | C | -2.75160500  | -5.19843100 | -2.24197800 |
| C | -6.62145500 | 0.80011600  | 0.39569400  | C | -4.22677700  | -5.43591800 | -2.61208600 |
| H | -7.44374700 | 1.48065900  | 0.58275600  | H | -4.32034600  | -6.37710400 | -3.16030400 |
| C | -6.87625700 | -0.57172600 | 0.16464600  | H | -4.86332900  | -5.50901800 | -1.72587600 |
| C | -5.78904300 | -1.37611400 | -0.12900200 | H | -4.61714200  | -4.63976700 | -3.25175400 |
| H | -5.95726400 | -2.42572400 | -0.31363300 | C | -2.28341500  | -6.37383600 | -1.35214100 |
| C | -4.45871000 | -0.89588800 | -0.17383700 | H | -2.42500200  | -7.32449600 | -1.87537300 |
| C | -3.35015700 | -1.76153900 | -0.55197800 | H | -1.22563800  | -6.29338600 | -1.09230600 |
| C | -3.57705400 | -3.02901800 | -1.13715300 | H | -2.85660400  | -6.41018800 | -0.42152200 |
| H | -4.59345800 | -3.32192700 | -1.34923200 | C | -1.92251800  | -5.18313500 | -3.54742800 |
| C | -2.54346500 | -3.86788200 | -1.50138600 | H | -2.04920700  | -6.12579700 | -4.08870800 |
| C | -1.24550100 | -3.48363700 | -1.09942400 | H | -2.24236800  | -4.36833900 | -4.20241100 |
| H | -0.43020300 | -4.18877400 | -1.20606800 | H | -0.85641100  | -5.05212400 | -3.34901800 |

TS-9

|   |             |             |             |   |             |             |             |
|---|-------------|-------------|-------------|---|-------------|-------------|-------------|
| C | -1.02361600 | 2.39935000  | -1.23273700 | C | -7.27311000 | 0.13340700  | 4.38363100  |
| C | -1.74920600 | 3.49604200  | -1.72335800 | C | 6.23594400  | 2.42151600  | 3.50727500  |
| C | -3.08663500 | 3.80533200  | -1.44731100 | C | 7.70503900  | 2.00388700  | 3.26208700  |
| C | -3.73710700 | 2.98995800  | -0.54282300 | C | 5.83004100  | 2.04287700  | 4.95101400  |
| C | -3.15127700 | 1.78984000  | -0.12327300 | C | 6.14458700  | 3.95187100  | 3.36928600  |
| C | -3.91323600 | 0.89579800  | 0.74054300  | C | 2.69614200  | 5.67804700  | -2.07369100 |
| C | -4.87600700 | 1.39105300  | 1.63911600  | C | 2.93694900  | 6.71500300  | -0.95210000 |
| C | -5.57142900 | 0.57918700  | 2.52788300  | C | 1.67129000  | 6.26779500  | -3.05972500 |
| C | -5.26014100 | -0.79379300 | 2.51849200  | C | 4.01683600  | 5.44149400  | -2.84398900 |
| C | -4.33442300 | -1.31486900 | 1.63548700  | H | -1.24645400 | 4.21858200  | -2.33845600 |
| C | -3.66440100 | -0.50140200 | 0.70140000  | H | -4.74336300 | 3.21397400  | -0.22336400 |
| C | -2.66512800 | -0.95430300 | -0.22584500 | H | -5.03688500 | 2.46079900  | 1.67426200  |
| C | -2.40214100 | -2.29020200 | -0.82061000 | H | -5.72619400 | -1.46416800 | 3.22828500  |
| C | -2.95472800 | -3.63253500 | -0.67697700 | H | -4.07456300 | -2.35933700 | 1.71079400  |
| C | -4.12615300 | -4.10172700 | -0.00147000 | H | -4.92080000 | -3.41752900 | 0.25656000  |
| C | -4.26646900 | -5.43774000 | 0.32848400  | H | -5.16754300 | -5.74824900 | 0.84599100  |
| C | -3.25810900 | -6.41446400 | 0.08410500  | H | -3.36317000 | -7.40790500 | 0.50603100  |
| C | -2.16519000 | -6.04737500 | -0.66516900 | H | -0.37928300 | -8.30798900 | 0.35700000  |
| C | -2.13450300 | -4.68983700 | -1.14964300 | H | 2.02673600  | -8.06312400 | 0.35125100  |

|   |             |             |             |   |             |             |             |
|---|-------------|-------------|-------------|---|-------------|-------------|-------------|
| C | -0.93257400 | -4.47612900 | -1.83752000 | H | 4.76936600  | -6.58018100 | 0.48583800  |
| C | -0.13204000 | -5.64747200 | -1.71585400 | H | 6.20404400  | -4.59083800 | 0.81744200  |
| C | -0.79598500 | -6.62598600 | -0.94145800 | H | 5.48973400  | -2.35786500 | 0.23075100  |
| C | 0.03729500  | -7.54511400 | -0.29247700 | H | 4.44894700  | -1.49757900 | 1.69342900  |
| C | 1.46194600  | -7.40011400 | -0.29587000 | H | 5.89091100  | -0.28608500 | 3.20986700  |
| C | 2.08986900  | -6.33229500 | -0.94839000 | H | 4.42459000  | 3.42050100  | 1.65729500  |
| C | 1.23870000  | -5.50800000 | -1.71913800 | H | 3.97773700  | 4.10189800  | -0.23529200 |
| C | 1.78610100  | -4.19938700 | -1.84380300 | H | 0.34266000  | 4.38105400  | -2.33731800 |
| C | 3.00965600  | -4.16618000 | -1.16173000 | H | -3.02395300 | 6.43698900  | -0.57102800 |
| C | 3.31570300  | -5.48949100 | -0.67829500 | H | -3.45924000 | 7.20336000  | -2.10797200 |
| C | 4.46401800  | -5.62846500 | 0.06514800  | H | -1.94449300 | 6.30918600  | -1.96242600 |
| C | 5.25612800  | -4.46844800 | 0.30495000  | H | -4.19924900 | 4.01084800  | -3.97347400 |
| C | 4.84774800  | -3.18823200 | -0.02341900 | H | -4.12530000 | 5.77536400  | -4.11393200 |
| C | 3.60231800  | -2.96509400 | -0.69258900 | H | -2.63730100 | 4.83269300  | -3.99305900 |
| C | 2.78969900  | -1.76183800 | -0.83272000 | H | -5.33638000 | 5.33997200  | -0.62182000 |
| C | 2.78065700  | -0.40027800 | -0.23822900 | H | -5.64830300 | 6.05576200  | -2.20169300 |
| C | 3.67158000  | 0.24420100  | 0.68657700  | H | -5.80494700 | 4.31068900  | -1.98702900 |
| C | 4.49481600  | -0.42213300 | 1.61970000  | H | -5.09327900 | 1.71435900  | 5.01083900  |
| C | 5.29635100  | 0.27376400  | 2.49720000  | H | -6.59298200 | 2.64996500  | 5.12996100  |
| C | 5.32772700  | 1.68559400  | 2.50845000  | H | -5.41510200 | 3.01910400  | 3.86587800  |
| C | 4.48439100  | 2.34242900  | 1.62574800  | H | -7.28107600 | 2.73278700  | 2.08561000  |
| C | 3.63652400  | 1.65930000  | 0.72765200  | H | -8.21659500 | 1.23580800  | 2.03410000  |
| C | 2.71006000  | 2.38382500  | -0.13483100 | H | -8.42830900 | 2.36995700  | 3.37827600  |
| C | 3.03666300  | 3.67417300  | -0.55235900 | H | -6.55451700 | -0.39081900 | 5.01926800  |
| C | 2.23109700  | 4.34739100  | -1.45570100 | H | -8.00181500 | 0.61547700  | 5.04071500  |
| C | 0.98498500  | 3.78035800  | -1.72522300 | H | -7.80800900 | -0.60920400 | 3.78525800  |
| C | 0.49830900  | 2.55399800  | -1.23294000 | H | 8.02150500  | 2.26781300  | 2.24931400  |
| C | 1.51906300  | 1.72707400  | -0.60995600 | H | 8.36707200  | 2.51281300  | 3.96940300  |
| C | 1.62183200  | 0.29571900  | -0.64470700 | H | 7.84844500  | 0.92824400  | 3.38698800  |
| C | 0.74536100  | -0.67739400 | -1.29094500 | H | 4.79458900  | 2.33020000  | 5.15229400  |
| C | 1.56303100  | -1.85601000 | -1.51545700 | H | 6.47286800  | 2.55619400  | 5.67279500  |
| C | 1.01657900  | -3.05796600 | -1.98750500 | H | 5.91961000  | 0.96917900  | 5.13056700  |
| C | -0.40964500 | -3.20309500 | -1.98421900 | H | 6.43749500  | 4.28753300  | 2.37064100  |
| C | -1.18496400 | -2.13557700 | -1.50922400 | H | 6.81938100  | 4.42527900  | 4.08741700  |
| C | -0.62048600 | -0.81630000 | -1.28779200 | H | 5.13594400  | 4.32049700  | 3.57437500  |
| C | -1.67211500 | -0.03917600 | -0.63695500 | H | 3.69978700  | 6.37939800  | -0.24592500 |
| C | -1.85851900 | 1.38402700  | -0.60124800 | H | 2.01852900  | 6.90126700  | -0.38887800 |
| C | -3.73778500 | 5.03842000  | -2.09693800 | H | 3.27414000  | 7.66480600  | -1.37860000 |
| C | -2.99346700 | 6.32126100  | -1.65777300 | H | 1.45664500  | 5.58136800  | -3.88349200 |
| C | -3.66723400 | 4.90411800  | -3.63573800 | H | 0.72907400  | 6.52369600  | -2.56696500 |
| C | -5.21774300 | 5.18632900  | -1.69790800 | H | 2.07063900  | 7.18797900  | -3.49420800 |
| C | -6.59209100 | 1.19636300  | 3.50161400  | H | 3.87399800  | 4.71503500  | -3.64842000 |
| C | -5.87804100 | 2.20630500  | 4.42999300  | H | 4.80501300  | 5.06265200  | -2.18958600 |
| C | -7.69287300 | 1.92810400  | 2.69886900  | H | 4.37085500  | 6.37706000  | -3.28801000 |

(P,PPM)-9

|   |             |             |             |   |             |             |             |
|---|-------------|-------------|-------------|---|-------------|-------------|-------------|
| C | -0.33689800 | -2.27289100 | 0.27981000  | C | 0.95973600  | -2.26740800 | -0.49792400 |
| C | -0.32408200 | -3.24406100 | 1.27713000  | C | 2.00977800  | -1.30520900 | -0.38629100 |
| H | 0.62885900  | -3.70761500 | 1.49842700  | C | 1.80928700  | 0.09968900  | -0.20603700 |
| C | -1.46629400 | -3.67040400 | 1.97961900  | C | 0.66602900  | 0.90159000  | -0.68300200 |
| C | -2.67463500 | -3.16703600 | 1.54200300  | C | 1.19809100  | 2.25995300  | -0.74292400 |
| H | -3.59219400 | -3.51119700 | 1.99456000  | C | 0.45893800  | 3.36008700  | -1.18169700 |
| C | -2.75696100 | -2.16927200 | 0.55047700  | C | -0.91524300 | 3.17246900  | -1.50763700 |
| C | -4.05679000 | -1.73859900 | 0.05242200  | C | -1.46996100 | 1.89512400  | -1.34656000 |
| C | -5.22441500 | -2.51732800 | 0.22496400  | C | -0.68487700 | 0.72019300  | -0.94850400 |
| H | -5.14331700 | -3.44646900 | 0.76819800  | C | -1.69550600 | -0.31423900 | -0.64869800 |
| C | -6.44777200 | -2.16970500 | -0.32500100 | C | -1.56183000 | -1.58540900 | 0.01464000  |
| C | -6.50137700 | -0.98937900 | -1.10329200 | C | -1.33003600 | -4.68172400 | 3.12847700  |
| H | -7.42562000 | -0.70501400 | -1.59247900 | C | -0.41005200 | -4.08623100 | 4.21978900  |
| C | -5.38984500 | -0.19804100 | -1.27787300 | H | -0.83072700 | -3.16029600 | 4.62093600  |
| H | -5.44974900 | 0.67636700  | -1.91318700 | H | 0.58514200  | -3.85913200 | 3.83109900  |
| C | -4.15180000 | -0.53396600 | -0.68575400 | H | -0.29370300 | -4.79427000 | 5.04616800  |
| C | -2.96736400 | 0.25189200  | -0.84052600 | C | -0.71113700 | -5.99647100 | 2.59888100  |
| C | -2.84430800 | 1.68686300  | -1.15494500 | H | -0.60760100 | -6.72098100 | 3.41251000  |
| C | -3.70697300 | 2.83399400  | -0.91349200 | H | 0.28019100  | -5.83652500 | 2.16926500  |
| C | -4.98971300 | 2.87073700  | -0.28229300 | H | -1.34429500 | -6.44171800 | 1.82641400  |
| H | -5.55602500 | 1.96346600  | -0.13164500 | C | -2.68726700 | -5.01587800 | 3.77326200  |
| C | -5.49520100 | 4.05333000  | 0.22601300  | H | -2.53887400 | -5.71889900 | 4.59722700  |
| H | -6.46218200 | 4.02916600  | 0.71661400  | H | -3.37224900 | -5.48505600 | 3.06153600  |
| C | -4.76965700 | 5.27697500  | 0.23171700  | H | -3.17232200 | -4.12511500 | 4.18152400  |
| H | -5.16492800 | 6.12689900  | 0.77739100  | C | -7.71490800 | -3.02448700 | -0.15529000 |
| C | -3.54143600 | 5.31488600  | -0.38684400 | C | -7.47635600 | -4.26546900 | 0.72363600  |
| C | -3.10155600 | 4.11183400  | -1.04574600 | H | -8.40872000 | -4.82735000 | 0.82411900  |
| C | -1.76051800 | 4.26852600  | -1.42882400 | H | -7.14529400 | -3.99344300 | 1.72963700  |
| C | -1.31099600 | 5.55182700  | -0.98596900 | H | -6.73341500 | -4.93805700 | 0.28647500  |
| C | -2.33787200 | 6.21811300  | -0.28309200 | C | -8.20345300 | -3.50380200 | -1.54248800 |
| C | -1.91492500 | 7.18340400  | 0.64203000  | H | -9.10857000 | -4.10974400 | -1.43690300 |
| H | -2.63615900 | 7.71789300  | 1.25156500  | H | -7.44093400 | -4.11354700 | -2.03448600 |
| C | -0.53492800 | 7.35872500  | 0.96104300  | H | -8.43918300 | -2.66666000 | -2.20326600 |
| H | -0.29753000 | 8.01408600  | 1.79264000  | C | -8.81977100 | -2.17026600 | 0.50999800  |
| C | 0.46052800  | 6.57553000  | 0.35987700  | H | -9.73298600 | -2.76062900 | 0.63235100  |
| C | 0.02310800  | 5.72754300  | -0.68097300 | H | -9.06987300 | -1.29095200 | -0.08776400 |
| C | 0.90870100  | 4.61797300  | -0.82082000 | H | -8.50325400 | -1.82443400 | 1.49779300  |
| C | 1.95960500  | 4.76104300  | 0.09705500  | C | 8.31782800  | -1.10065200 | 0.23433000  |
| C | 1.77230900  | 5.98840200  | 0.82583300  | C | 9.18439800  | -0.36704900 | -0.81645600 |
| C | 2.59493700  | 6.19973800  | 1.90896400  | H | 10.21620100 | -0.72912400 | -0.77490200 |
| H | 2.50448600  | 7.07947900  | 2.53678000  | H | 9.20414500  | 0.71190100  | -0.64790800 |
| C | 3.52770700  | 5.18506000  | 2.26541400  | H | 8.80293800  | -0.54072800 | -1.82620200 |
| H | 4.16060700  | 5.35465400  | 3.12964300  | C | 8.89129100  | -0.83561400 | 1.64635400  |

|                           |             |             |             |   |             |             |             |
|---------------------------|-------------|-------------|-------------|---|-------------|-------------|-------------|
| C                         | 3.59899700  | 3.95681300  | 1.63283500  | H | 9.92124200  | -1.19955400 | 1.71152300  |
| H                         | 4.23897000  | 3.19549800  | 2.05843100  | H | 8.30002700  | -1.34859700 | 2.40968700  |
| C                         | 2.76277900  | 3.66326600  | 0.51121600  | H | 8.89844900  | 0.22937800  | 1.88896700  |
| C                         | 2.41209300  | 2.37093100  | -0.05017100 | C | 8.40645600  | -2.61210200 | -0.04293200 |
| C                         | 2.87757500  | 0.96410800  | 0.07931500  | H | 9.44846400  | -2.93585100 | 0.02378500  |
| C                         | 4.21918200  | 0.47058800  | 0.15103500  | H | 8.04787700  | -2.86386200 | -1.04473900 |
| C                         | 5.34190600  | 1.30009300  | 0.38662800  | H | 7.83369600  | -3.19373300 | 0.68455700  |
| H                         | 5.19645800  | 2.35904600  | 0.53330900  | C | 2.75161300  | -5.19840600 | -2.24216100 |
| C                         | 6.62142500  | 0.80001400  | 0.39566300  | C | 4.22673700  | -5.43569400 | -2.61262900 |
| H                         | 7.44374700  | 1.48054700  | 0.58260700  | H | 4.32028800  | -6.37682400 | -3.16094400 |
| C                         | 6.87618600  | -0.57187300 | 0.16476600  | H | 4.86350900  | -5.50879500 | -1.72657700 |
| C                         | 5.78897000  | -1.37625000 | -0.12888300 | H | 4.61685800  | -4.63944100 | -3.25232000 |
| H                         | 5.95715500  | -2.42587500 | -0.31344900 | C | 2.28376100  | -6.37387000 | -1.35220700 |
| C                         | 4.45865400  | -0.89598100 | -0.17379300 | H | 2.42541300  | -7.32452000 | -1.87544000 |
| C                         | 3.35012200  | -1.76160400 | -0.55194300 | H | 1.22601500  | -6.29357700 | -1.09219200 |
| C                         | 3.57704900  | -3.02907700 | -1.13713800 | H | 2.85712500  | -6.41009800 | -0.42169300 |
| H                         | 4.59346300  | -3.32195800 | -1.34918800 | C | 1.92220900  | -5.18319900 | -3.54739600 |
| C                         | 2.54347500  | -3.86790600 | -1.50147500 | H | 2.04880100  | -6.12588000 | -4.08865800 |
| C                         | 1.24547900  | -3.48366800 | -1.09955500 | H | 2.24187200  | -4.36842500 | -4.20249700 |
| H                         | 0.43020300  | -4.18881000 | -1.20629500 | H | 0.85614400  | -5.05221000 | -3.34874800 |
| <b>TS<sub>rot</sub>-8</b> |             |             |             |   |             |             |             |
| C                         | 2.88637700  | 1.68292400  | 0.94312300  | H | -7.64270600 | -3.18728600 | -0.75110100 |
| C                         | 3.70451100  | 2.81792300  | 0.54213900  | H | -9.14922500 | -2.91099900 | -1.63199900 |
| C                         | 4.86024300  | 2.83925700  | -0.30012300 | H | -8.64290800 | -1.78493900 | -0.36155300 |
| H                         | 5.37842800  | 1.92506900  | -0.54767100 | C | -2.76148700 | -1.36222600 | 2.54074200  |
| C                         | 5.29037400  | 4.01512400  | -0.88652700 | H | -3.49246300 | -0.57989500 | 2.70783900  |
| H                         | 6.15887800  | 3.97698600  | -1.53504000 | C | -2.75292100 | -2.47458000 | 3.36136900  |
| C                         | 4.59510000  | 5.25016900  | -0.76718100 | H | -3.49118200 | -2.54066500 | 4.15240300  |
| H                         | 4.90587200  | 6.09611500  | -1.37059800 | C | -1.79629500 | -3.48791100 | 3.19651200  |
| C                         | 3.48965700  | 5.30495000  | 0.04928300  | C | -0.88453300 | -3.32308800 | 2.15602400  |
| C                         | 2.30247900  | 6.23023600  | 0.14701000  | H | -0.13238400 | -4.07888600 | 1.97596600  |
| C                         | 1.74604200  | 7.21281000  | -0.68558200 | C | -1.78400400 | -4.70282400 | 4.13945900  |
| H                         | 2.36414000  | 7.74559800  | -1.40075600 | C | -0.66347700 | -5.70128200 | 3.79741500  |
| C                         | 0.33428200  | 7.41764100  | -0.76656600 | H | -0.77248300 | -6.10587500 | 2.78751700  |
| H                         | -0.02504100 | 8.09389700  | -1.53523500 | H | -0.69725400 | -6.54244400 | 4.49502600  |
| C                         | -0.56083000 | 6.63892100  | -0.01934200 | H | 0.32659000  | -5.24490700 | 3.87831100  |
| C                         | -1.95246900 | 6.09018100  | -0.24025100 | C | -3.13780700 | -5.44375000 | 4.04016700  |
| C                         | -3.02496900 | 6.42636300  | -1.02619900 | H | -3.97538500 | -4.79844600 | 4.31452600  |
| H                         | -3.07109200 | 7.35239900  | -1.58813200 | H | -3.14812100 | -6.30753300 | 4.71206700  |
| C                         | -4.10560200 | 5.50319100  | -1.08699000 | H | -3.31176100 | -5.80309700 | 3.02212400  |
| H                         | -5.00534400 | 5.79705600  | -1.61646000 | C | -1.57103500 | -4.21900800 | 5.59302900  |
| C                         | -4.06344600 | 4.23303800  | -0.54351800 | H | -0.61805900 | -3.69263800 | 5.69248600  |
| H                         | -4.95987600 | 3.64764700  | -0.64306200 | H | -1.56313800 | -5.07140500 | 6.27937400  |
| C                         | -2.91022600 | 3.74068900  | 0.16114900  | H | -2.36314000 | -3.53915900 | 5.91480200  |

|   |             |             |             |   |             |             |             |
|---|-------------|-------------|-------------|---|-------------|-------------|-------------|
| C | -2.44847600 | 2.39169700  | 0.53789000  | C | -0.15557100 | -3.30569400 | -0.74432300 |
| C | -2.84624400 | 0.91607500  | 0.35011100  | H | -1.11917500 | -3.79690800 | -0.68059700 |
| C | -1.80154700 | 0.12811700  | 0.84077700  | C | 0.77920700  | -3.74253200 | -1.70400600 |
| C | -1.83088200 | -1.19762700 | 1.49544800  | C | 2.04930300  | -3.20816700 | -1.61027100 |
| C | -0.87954900 | -2.20452600 | 1.29949300  | H | 2.82436200  | -3.56308200 | -2.27244300 |
| C | 0.10000400  | -2.29077800 | 0.16528400  | C | 2.37396100  | -2.18216300 | -0.69740100 |
| C | 1.34482800  | -1.58973500 | 0.10187800  | C | 0.37645700  | -4.80056300 | -2.74279100 |
| C | 1.63071100  | -0.31233700 | 0.71170100  | C | 1.52977900  | -5.14555300 | -3.70207100 |
| C | 2.92098300  | 0.23870600  | 0.62293300  | H | 1.87625900  | -4.26640100 | -4.25199500 |
| C | 3.14595700  | 4.10535700  | 0.77249200  | H | 1.18931300  | -5.88141200 | -4.43540900 |
| C | 1.88853400  | 4.28196400  | 1.37128700  | H | 2.38327700  | -5.57983500 | -3.17404100 |
| C | 1.39477900  | 5.57219000  | 1.00290200  | C | -0.05807800 | -6.09989700 | -2.02487800 |
| C | 0.03455300  | 5.76356400  | 0.91046700  | H | 0.75978500  | -6.50465300 | -1.42240200 |
| C | -0.82224000 | 4.65283800  | 1.15542000  | H | -0.34810200 | -6.85857200 | -2.75827200 |
| C | -2.00407700 | 4.81056700  | 0.43114000  | H | -0.91183300 | -5.93497700 | -1.36385200 |
| C | -1.17454000 | 2.31517800  | 1.14060300  | C | -0.80471300 | -4.25960400 | -3.58204400 |
| C | -0.65319100 | 0.96319900  | 1.14025500  | H | -1.67027200 | -4.02394100 | -2.95892000 |
| C | 0.71870200  | 0.75186100  | 1.18629300  | H | -1.11614000 | -5.00280000 | -4.32262400 |
| C | 1.57457900  | 1.91648800  | 1.38495000  | H | -0.51952800 | -3.34769800 | -4.11329100 |
| C | 1.05449200  | 3.19891700  | 1.60420400  | C | 3.75519000  | -1.75279600 | -0.52157100 |
| C | -0.35554100 | 3.39707600  | 1.47070600  | C | 4.02821900  | -0.56284700 | 0.19970100  |
| C | -4.03841600 | 0.31567000  | -0.29014300 | C | 5.37174200  | -0.25478200 | 0.51003900  |
| C | -5.03028100 | 1.06372200  | -0.93329500 | H | 5.58263500  | 0.59899000  | 1.14104300  |
| H | -4.92165700 | 2.12486800  | -1.00360300 | C | 6.40640500  | -1.04796100 | 0.07173100  |
| C | -6.13777600 | 0.48917900  | -1.55372700 | H | 7.41972100  | -0.78488000 | 0.35165700  |
| H | -6.85243500 | 1.15143000  | -2.02520300 | C | 6.16596300  | -2.20297200 | -0.70926000 |
| C | -6.32620500 | -0.89127400 | -1.58420800 | C | 4.84637400  | -2.52960400 | -0.97588100 |
| C | -5.31258300 | -1.65948000 | -0.98740600 | H | 4.63551900  | -3.44292200 | -1.51072700 |
| H | -5.37557000 | -2.74189600 | -1.00412300 | C | 7.35283700  | -3.05667100 | -1.18624600 |
| C | -4.21004600 | -1.08784800 | -0.37816000 | C | 8.13462600  | -3.58372700 | 0.04004300  |
| H | -3.46875100 | -1.75349100 | 0.03099000  | H | 8.52138300  | -2.76986100 | 0.65735500  |
| C | -7.53733500 | -1.57052700 | -2.23927400 | H | 8.98652800  | -4.18883000 | -0.28502600 |
| C | -7.05527000 | -2.49425200 | -3.38241700 | H | 7.49521700  | -4.20698100 | 0.67091300  |
| H | -6.52373800 | -1.92241600 | -4.14777600 | C | 8.28984800  | -2.18506000 | -2.05532400 |
| H | -7.90927800 | -2.98748000 | -3.85691600 | H | 7.76341900  | -1.80444500 | -2.93481500 |
| H | -6.38094000 | -3.27253400 | -3.01816500 | H | 9.14503400  | -2.77492100 | -2.39906700 |
| C | -8.52878800 | -0.55131200 | -2.82919100 | H | 8.67857100  | -1.32774000 | -1.50123200 |
| H | -8.92362200 | 0.12090700  | -2.06255600 | C | 6.90896500  | -4.26650400 | -2.02806200 |
| H | -9.37654900 | -1.07876500 | -3.27456200 | H | 6.27702900  | -4.95145600 | -1.45624700 |
| H | -8.06923200 | 0.05560100  | -3.61399500 | H | 7.78859100  | -4.82739600 | -2.35478200 |
| C | -8.28465400 | -2.41475000 | -1.18033200 | H | 6.36209200  | -3.95954900 | -2.92380100 |



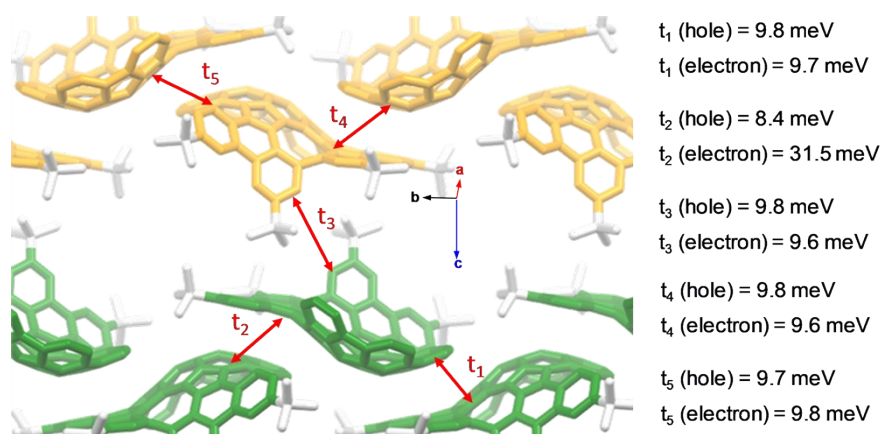

**Fig. S10** The calculated transfer integrals of **9**.

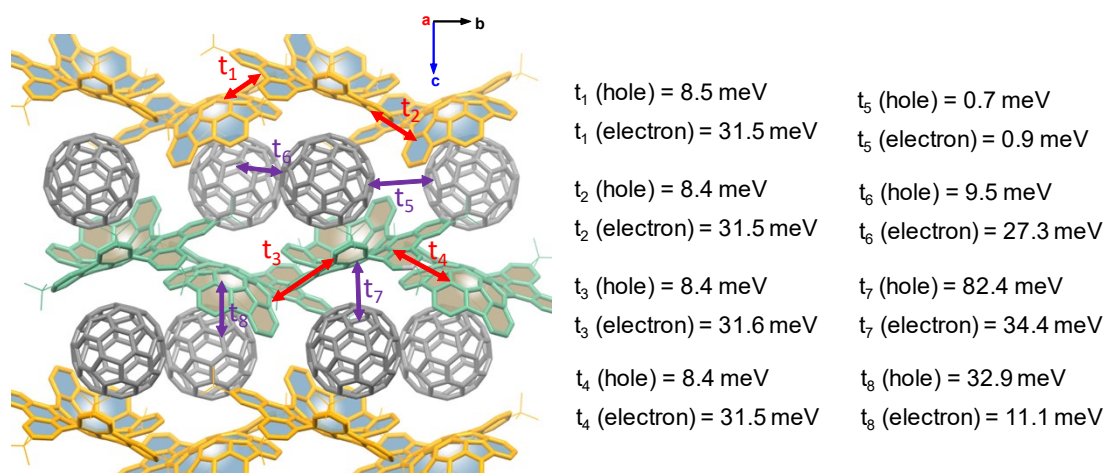

**Fig. S11** The calculated transfer integrals of **9·C<sub>60</sub>**.

## 6. VT-NMR spectra of 7, 8, and 9

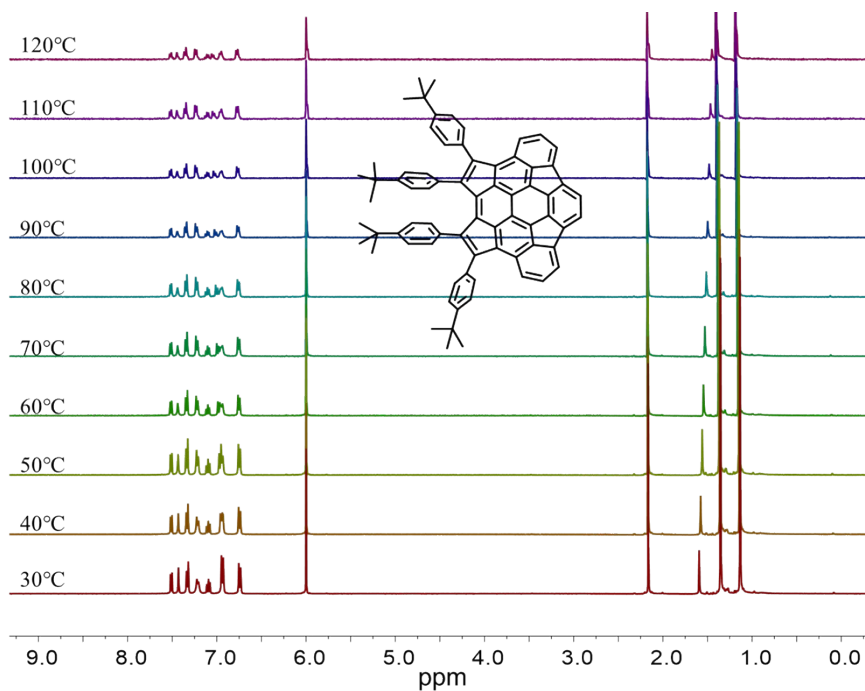

**Fig. S12** Variable-temperature  $^1\text{H}$  NMR spectra of **7** in 1,1,2,2-tetrachloroethane- $d_2$ .

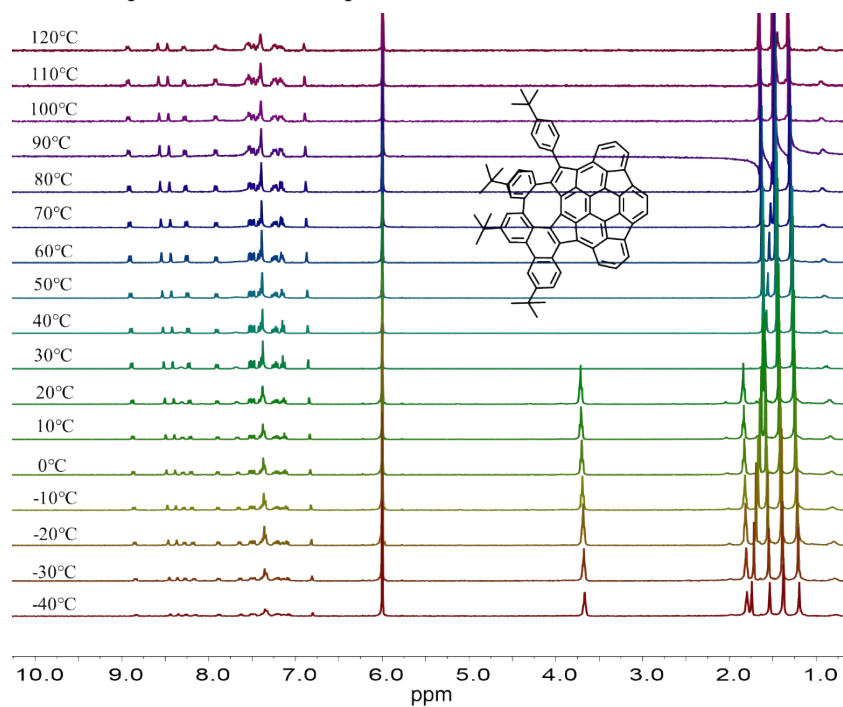

**Fig. S13** Variable-temperature  $^1\text{H}$  NMR spectra of **8** in 1,1,2,2-tetrachloroethane- $d_2$ .

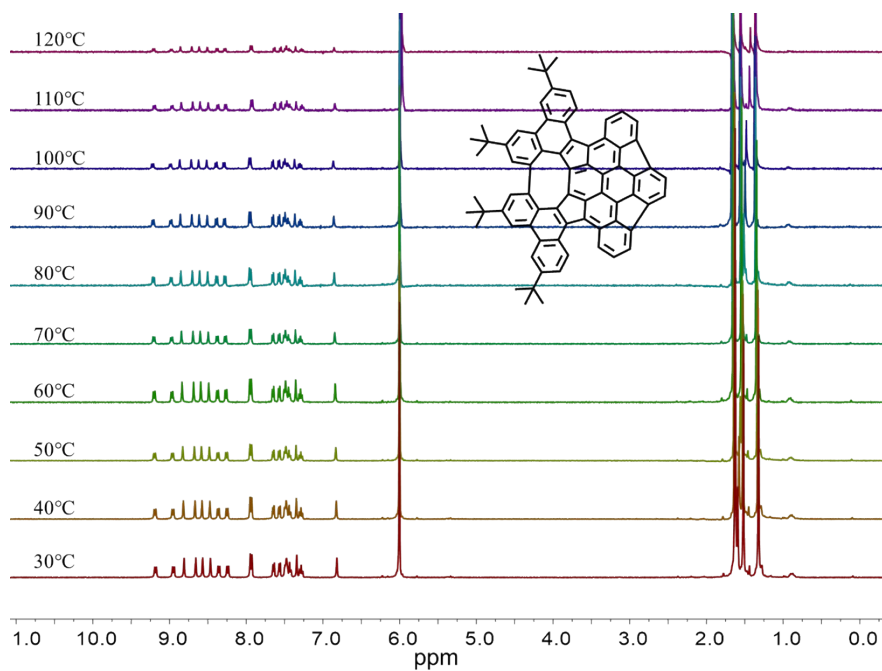

**Fig. S14** Variable-temperature  $^1\text{H}$  NMR spectra of **9** in 1,1,2,2-tetrachloroethane- $d_2$ .

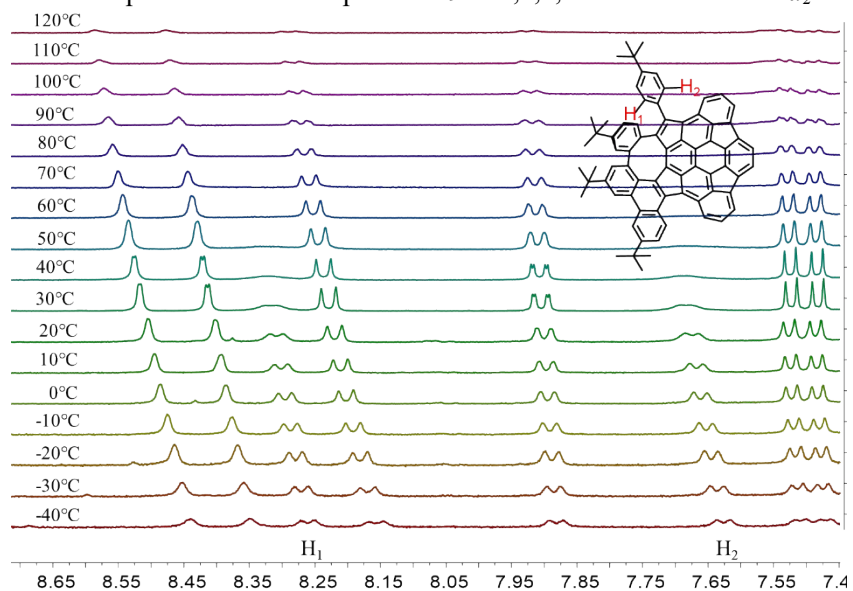

**Fig. S15** Variable-temperature  $^1\text{H}$  NMR spectra of **8** in 1,1,2,2-tetrachloroethane- $d_2$ .

For the coalescence temperature  $k_{\text{exch}}$  for **8** can be calculated using<sup>[8]</sup>:

$$k_{\text{exch}} = \frac{\pi\Delta V_0}{\sqrt{2}} \quad (1)$$

$$k_{\text{exch}} = \frac{k_b T_c}{h} e^{-\Delta G^\ddagger / RT_c} \quad (2)$$

$h = 6.626 \cdot 10^{-34} \text{ J} \cdot \text{sec}$ ,  $T_c = \text{coalescence temperature in K}$ ;  $k_b = 1.381 \cdot 10^{-23} \text{ J/K}$ ,  $R = 3.814 \text{ J/mol} \cdot \text{K}$ ,

In this particular case,  $\Delta\nu = 252 \text{ Hz}$ .  $\Delta G^\ddagger = 15.4 \text{ kcal} \cdot \text{mol}^{-1}$  ( $T_c = 333 \text{ K}$ ).

## 7. Chiral HPLC analysis and kinetic study of racemization barrier of **8** and **9**

HPLC analysis was conducted on a Shimadzu LC-20A instrument equipped with equipped with a CHIRALPAK® IC column.

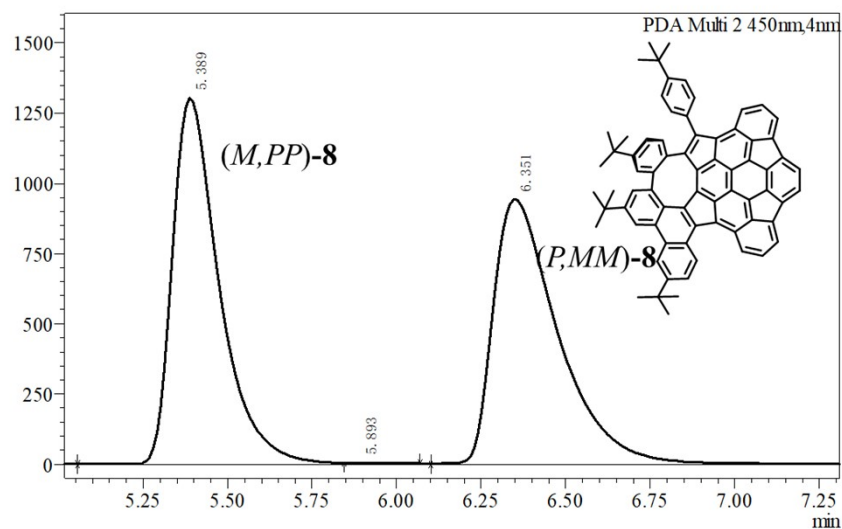

**Fig. S16** The HPLC analysis spectra of **8** (eluent: n-hexane/dichloromethane = 50:50, 0.8 mL·min<sup>-1</sup>, 25 °C, Detector: PDA Ch2 450nm 4nm).

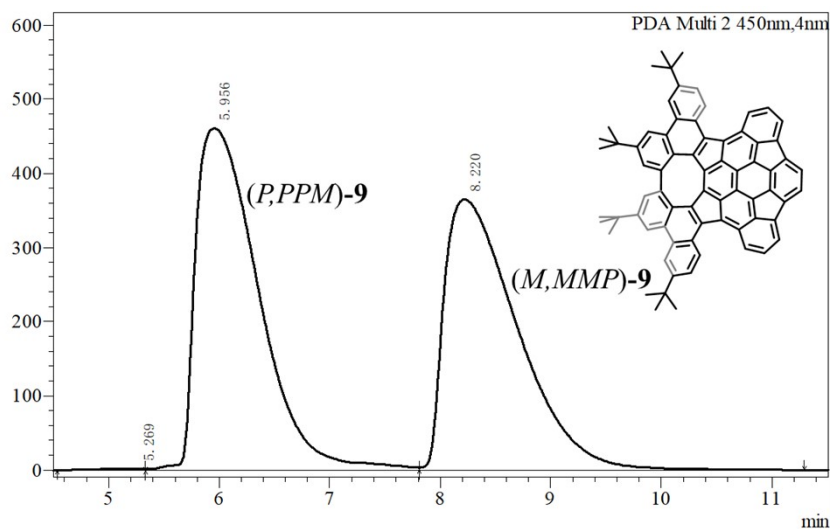

**Fig. S17** The HPLC analysis spectra of **9** (eluent: n-hexane/dichloromethane = 50:50, 0.8 mL·min<sup>-1</sup>, 25 °C, Detector: PDA Ch2 450nm 4nm).

**Table S6** Thermal stability tests of (*P,PPM*)-**9** heated at different temperature in toluene.

| T/°C | Time/min | Time/s | Major ent.(%) | Minor ent.(%) | ee   | ln([ee] <sub>t</sub> /[ee] <sub>0</sub> ) |
|------|----------|--------|---------------|---------------|------|-------------------------------------------|
| 65   | 0        | 0      | 99.2          | 0.8           | 98.4 | 0                                         |
|      | 70       | 4200   | 94.9          | 5.1           | 89.8 | -0.09145                                  |
|      | 180      | 10800  | 88.9          | 11.1          | 77.8 | -0.2349                                   |
| T/°C | Time/min | Time/s | Major ent.(%) | Minor ent.(%) | ee   | ln([ee] <sub>t</sub> /[ee] <sub>0</sub> ) |
| 80   | 0        | 0      | 99.2          | 0.8           | 98.4 | 0                                         |
|      | 45       | 2700   | 87.2          | 12.8          | 74.4 | -0.2796                                   |

|      | 90       | 5400   | 78.7          | 21.3          | 57.4 | -0.5390                                   |
|------|----------|--------|---------------|---------------|------|-------------------------------------------|
|      | 120      | 7200   | 74.2          | 25.8          | 48.4 | -0.7095                                   |
|      | 180      | 10800  | 65.9          | 34.1          | 31.8 | -1.1296                                   |
| T/°C | Time/min | Time/s | Major ent.(%) | Minor ent.(%) | ee   | ln([ee] <sub>t</sub> /[ee] <sub>0</sub> ) |
| 85   | 0        | 0      | 99.2          | 0.8           | 98.4 | 0                                         |
|      | 30       | 1800   | 87.8          | 12.2          | 75.6 | -0.2636                                   |
|      | 70       | 4200   | 75.7          | 24.3          | 51.4 | -0.6494                                   |
|      | 120      | 7200   | 65.8          | 34.2          | 31.6 | -1.1359                                   |
|      | 180      | 10800  | 59.2          | 40.8          | 18.4 | -1.6767                                   |
| T/°C | Time/min | Time/s | Major ent.(%) | Minor ent.(%) | ee   | ln([ee] <sub>t</sub> /[ee] <sub>0</sub> ) |
| 90   | 0        | 0      | 99.2          | 0.8           | 98.4 | 0                                         |
|      | 30       | 1800   | 77.3          | 22.7          | 54.6 | -0.5890                                   |
|      | 50       | 3000   | 70.7          | 29.3          | 41.4 | -0.8658                                   |
|      | 80       | 4800   | 62.0          | 38.0          | 24   | -1.4110                                   |
|      | 112      | 6720   | 55.7          | 44.3          | 11.4 | -2.1554                                   |

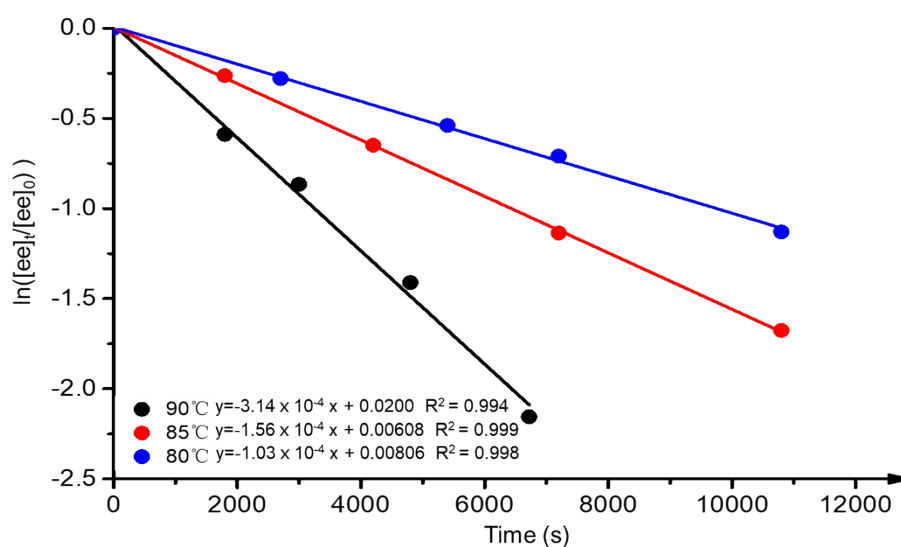

**Fig. S18** Temperature-dependent plots of the decreasing *ee* ratio of enantioenriched (*P,PPM*)-**9** in toluene.

The exchange rate constant (*k*) was determined, then fitting with Eyring equation:

$$\ln \frac{k}{T} = -\frac{\Delta H^\ddagger}{RT} + \frac{\Delta S^\ddagger}{R} + \ln \frac{k_B}{h}, \text{ and } \Delta G^\ddagger = \Delta H^\ddagger - T\Delta S^\ddagger,$$

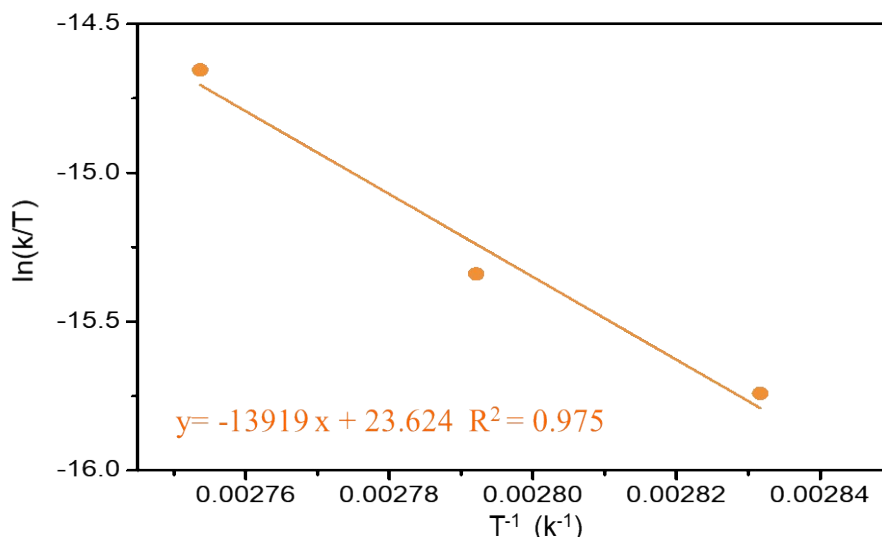

**Fig. S19** Fitting of the exchange rate constants with temperature by Eyring equation for (*P,PPM*)-**9** in toluene giving thermodynamic parameters:  $\Delta H^\ddagger = 27.6 \text{ kcal}\cdot\text{mol}^{-1}$ ;  $\Delta S^\ddagger = -1.05 \text{ J}\cdot\text{mol}^{-1}\cdot\text{K}^{-1}$ ;  $\Delta G^\ddagger = 27.7 \text{ kcal}\cdot\text{mol}^{-1}$  (298 K).

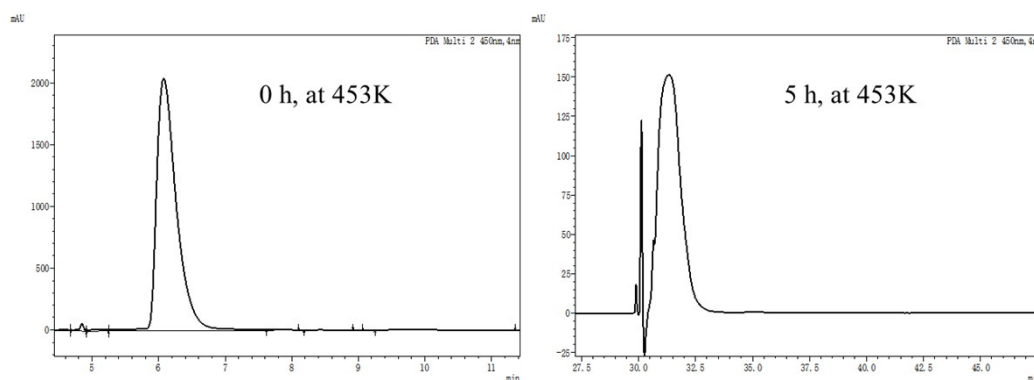

**Fig. S20** HPLC chromatogram of (*M,PP*)-**8** after heating at 453K for different times: 0 h (left) and 5 h (right).

The half-life time ( $t_{1/2}$ ) of racemization was calculated from the equation:

$$t_{\frac{1}{2}} = \frac{\ln 2}{k_r}$$

The estimated values of the Gibbs activation energy ( $\Delta G^\ddagger(T)$ ) for enantiomerization of (*M,PP*)-**8** were obtained by using Eyring equation. The rate constant of racemization was calculated from the maximum time to which compounds (*M,PP*)-**8** remain unchanged at a specific temperature (453 K).

### 8. Binding behaviors with $C_{60}$

The association behaviors of **7/8/9** and  $C_{60}$  were analyzed by NMR titrations. A solution of **7/8/9** ( $6.0 \times 10^{-4} \text{ M}$  in toluene- $d_8$ ) and a solution of  $C_{60}$  ( $6.0 \times 10^{-4} \text{ M}$  in toluene- $d_8$ ) were prepared. The solutions were mixed with different ratios.

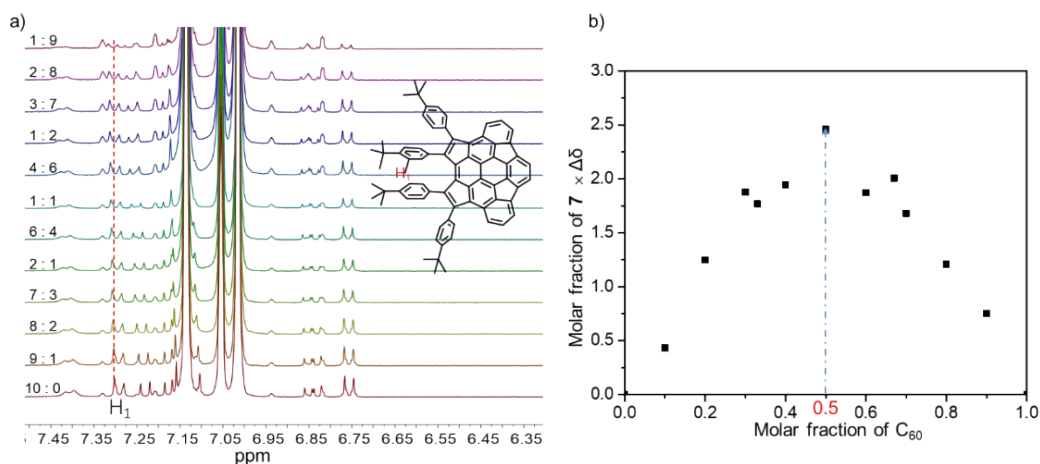

**Fig. S21** a) NMR spectra of **7** and  $C_{60}$  mixed in different ratio in toluene- $d_8$  at 298 K (total concentration of  $6.0 \times 10^{-4}$  M), b) Job plot showing complexation between **7** and  $C_{60}$ .

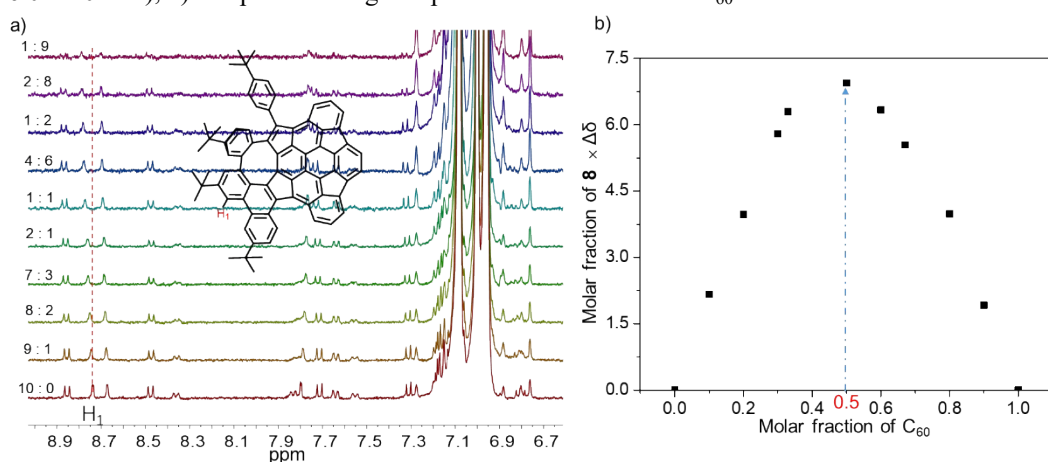

**Fig. S22** a) NMR spectra of **8** and  $C_{60}$  mixed in different ratio in toluene- $d_8$  at 298 K (total concentration of  $6.0 \times 10^{-4}$  M), b) Job plot showing complexation between **8** and  $C_{60}$ .

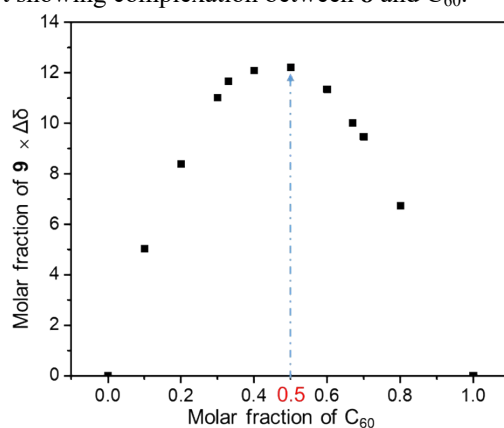

**Fig. S23** Job plot showing complexation between **9** and  $C_{60}$ .

A solutions of **7/8/9** at a concentration of approximately  $4 \times 10^{-4}$  M. Those solutions were utilized as solvents in the  $C_{60}$  solution ( $1.2 \times 10^{-3}$  M), to ensure working at constant concentration of host. The  $K_a$  were determined by the equation:<sup>[9]</sup>

$$\Delta\delta = \delta_{\Delta HG} * \frac{1}{2H_0} \left[ \left( G_0 + H_0 + \frac{1}{K_a} \right) - \sqrt{\left( G_0 + H_0 + \frac{1}{K_a} \right)^2 + 4[H_0][G_0]} \right]$$

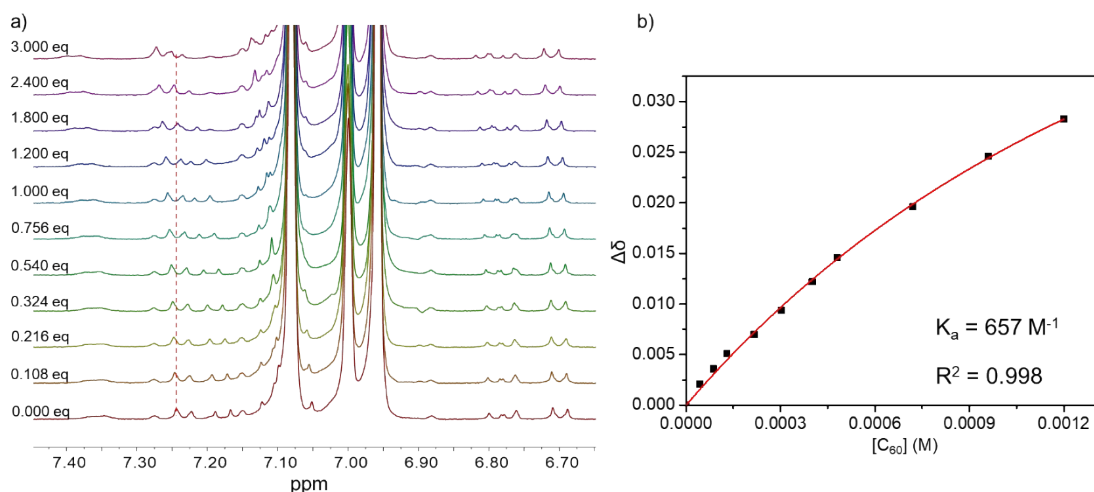

**Fig. S24** (a) Proton NMR spectra from a mixture of different ratios of  $C_{60}$  and **7** in toluene- $d_8$  at 298 K, (b) Binding isotherms fitted to a 1:1 binding model.

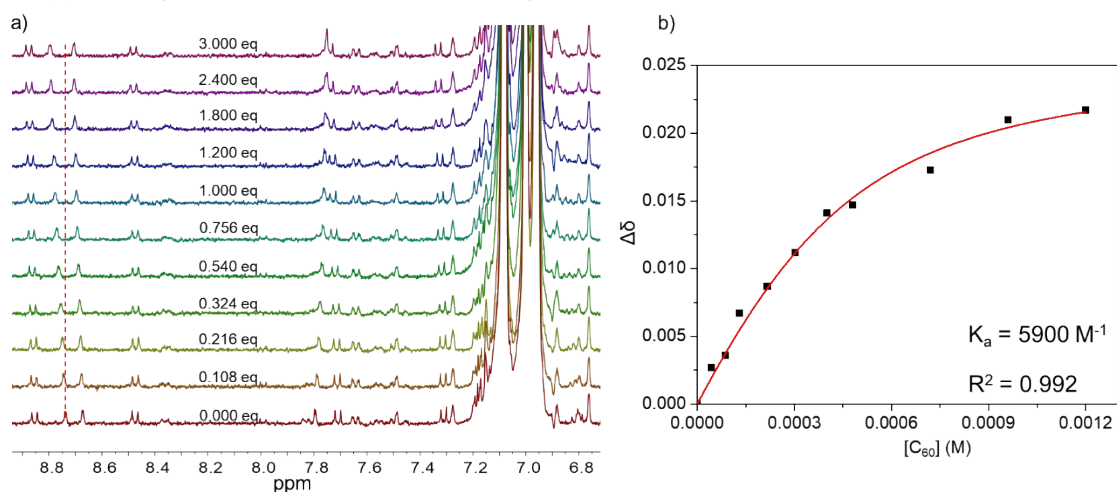

**Fig. S25** (a) Proton NMR spectra from a mixture of different ratios of  $C_{60}$  and **8** in toluene- $d_8$  at 298 K, (b) Binding isotherms fitted to a 1:1 binding model.

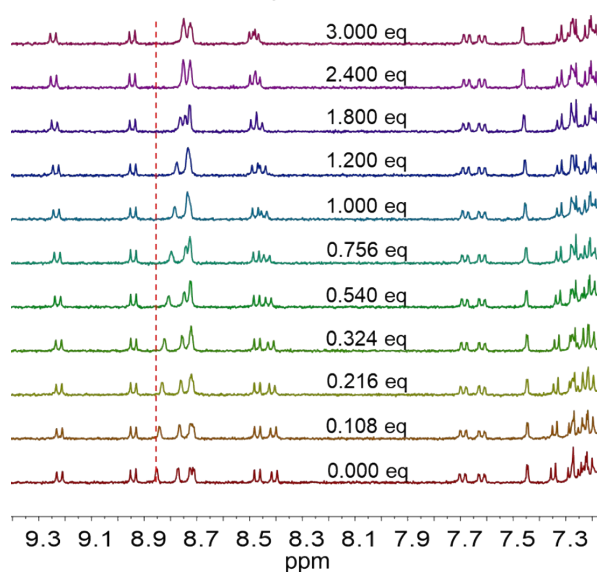

**Fig. S26** Proton NMR spectra from a mixture of different ratios of  $C_{60}$  and **9** in toluene- $d_8$  at 298 K.

## 9. OFET Fabrication and Characterization



**Thin-film devices fabrication:** OTFT devices were fabricated in bottom-gate/bottom-contact (BGBC) type, where heavily doped silicon substrates were employed as substrate and gate electrodes, Au as source and drain electrodes. The source and drain gold electrodes were prepared by photolithography. The thin films of compound **7**, **8** and **9** were fabricated by spin-coating 5 mg/mL chlorobenzene solution at 1500 rpm for 40 s, respectively, which were subsequently annealed at 120 °C under vacuum.

**The micro/nanometer-sized single-crystals devices fabrication:** The heavily n-doping Si wafers with 300 nm SiO<sub>2</sub> layer were used as substrates in this work. The SiO<sub>2</sub>/Si wafers were cleaned with deionized water, piranha solution (H<sub>2</sub>SO<sub>4</sub>/H<sub>2</sub>O<sub>2</sub>=2:1), deionized water, isopropyl alcohol, and finally were blown dry with high-purity nitrogen gas. Treatment of wafers with octadecyltrichlorosilane (OTS) was conducted by the vaper-desposition method. Clean wafers were dried under vacuum at 90 °C for 90 minutes to remove the moisture. When the temperature was reduced to room temperature, a small drop of OTS was dropped around the wafers and kept 120 °C for 2 hours under the vacuum. After that the OTS treated SiO<sub>2</sub>/Si substrates were cleaned with n-hexane, chloroform, isopropyl alcohol, respectively. Micro/nanometer-sized single-crystals were prepared by drop casting method in a sealed container with toluene as the solvent. The single crystals of compound **9** were fabricated by slow solution evaporation on OTS modified SiO<sub>2</sub>/Si substrates. The micro/nanometer-sized co-crystals of **9**·C<sub>60</sub> were prepared by slow solution evaporation of toluene on OTS modified SiO<sub>2</sub>/Si substrates. The bottom-gate top-contact (BGTC) devices based on single crystals were fabricated in “gold strips” method<sup>[10]</sup>.

**Devices characterization:** All electrical characteristics of the devices were measured at room temperature using a semiconductor parameter analyser (Keithley 4200 SCS) in nitrogen atmosphere. The mobilities of the devices were calculated in the saturation regime. The equation is listed as follows:

$$I_{DS} = (W/2L) C_i \mu (V_{GS} - V_t)^2$$

where W/L is the channel width/length, C<sub>i</sub> is the insulator capacitance per unit area (10 nF /cm<sup>2</sup>), and V<sub>GS</sub> and V<sub>t</sub> are the gate voltage and threshold voltage, respectively. This equation defines the important characteristics of electron mobility (μ), on/off ratio (I<sub>on</sub>/I<sub>off</sub>), and threshold voltage (V<sub>t</sub>), which could be deduced by the equation from the plot of current–voltage. The microscope images of microcrystal were acquired by SOPTOP RX50M microscope. Atomic force microscopy (AFM) measurements were carried out with a Nanoscope IIIa instrument (Digital Instruments). X-ray diffraction (XRD) was measured on a D/max 2500 with a Cu Kα source (κ = 1.541 Å). TEM observation was carried out with a JEOL 1011 JEM-2100F microscope operated at 200 kV.

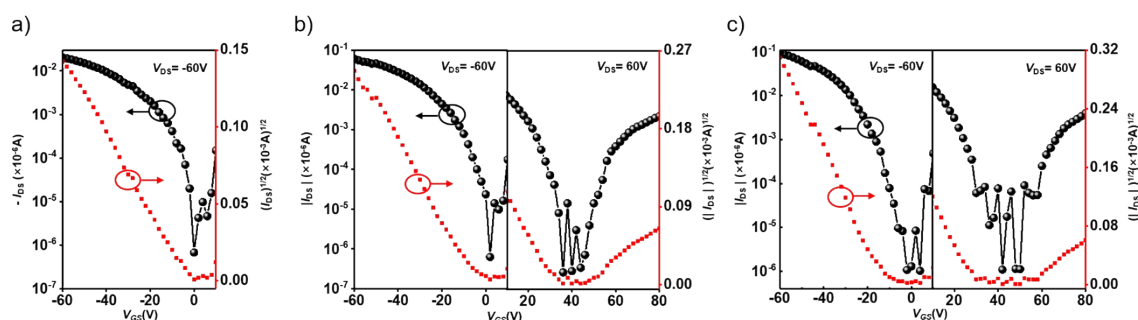

**Fig. S27** The transfer characteristics of the thin films of **7** (a), **8** (b), **9** (c).

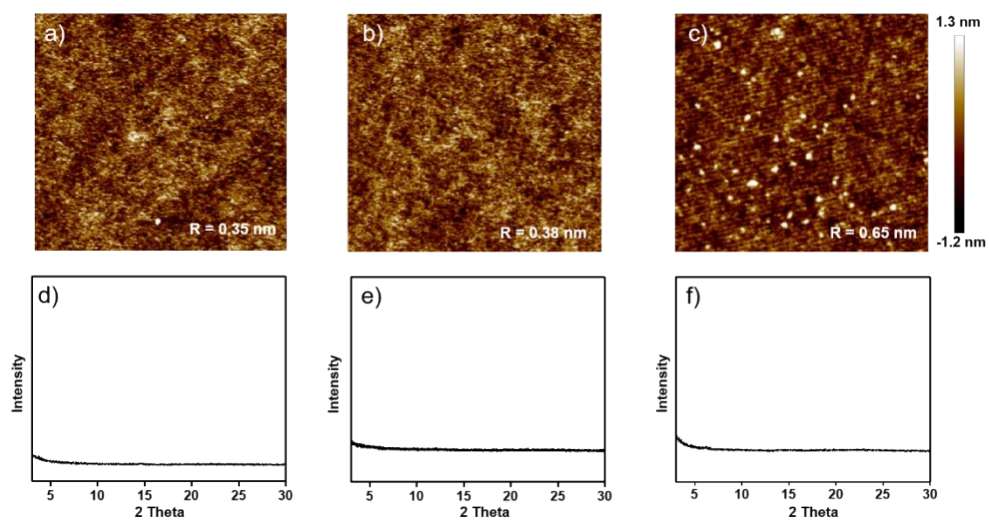

**Fig. S28** AFM images and XRD patterns of thin films of **7** (a, d), **8** (b, e), **9** (c, f).

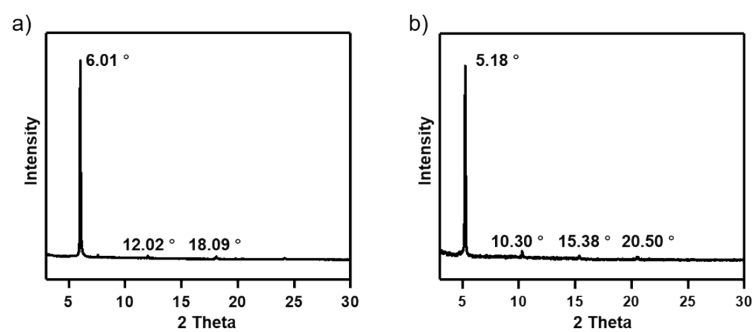

**Fig. S29** XRD pattern of microbelts of **9** (a) and **9·C<sub>60</sub>** (b).

## 10. $^1\text{H}$ NMR, $^{13}\text{C}$ NMR and HRMS spectra of compounds

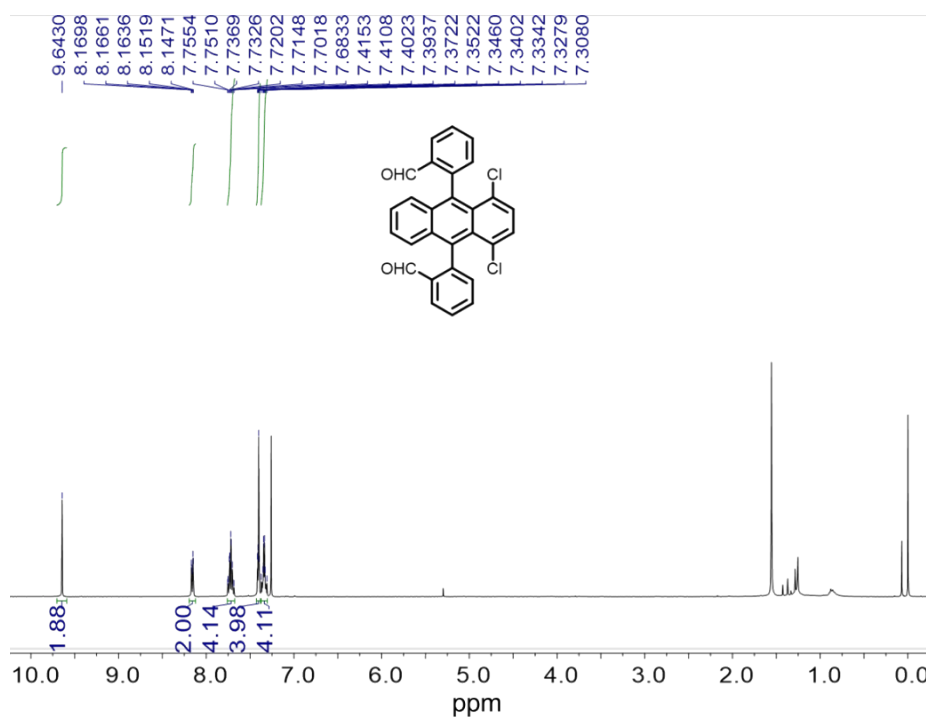

**Fig. S30**  $^1\text{H}$  NMR spectrum of *syn-1* in  $\text{CDCl}_3$  (400 MHz, 298 K).

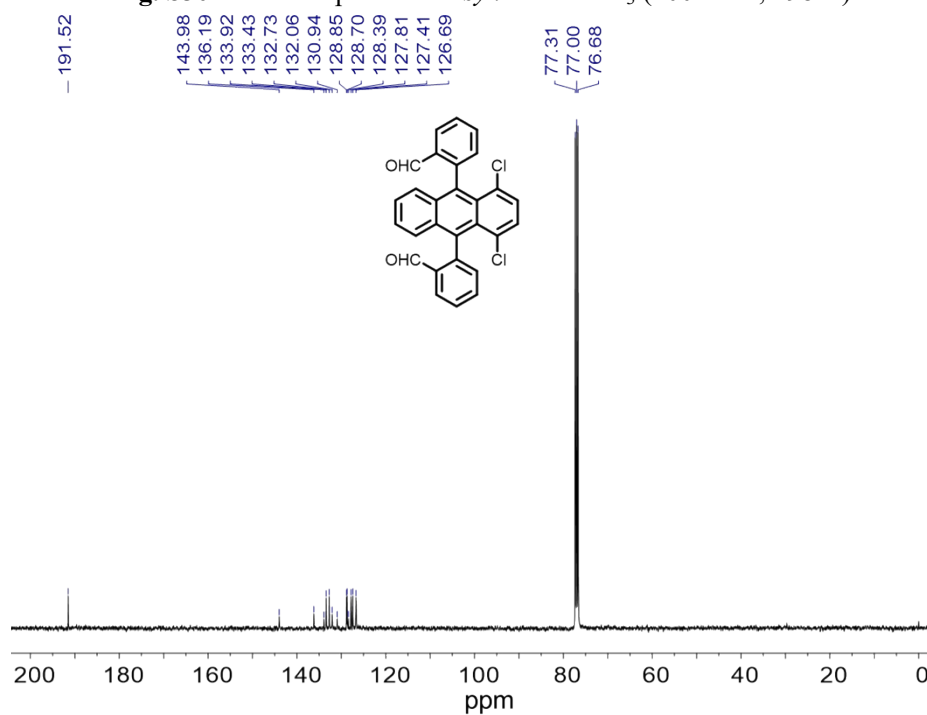

**Fig. S31**  $^{13}\text{C}$  NMR spectrum of *syn-1* in  $\text{CDCl}_3$  (400 MHz, 298 K).

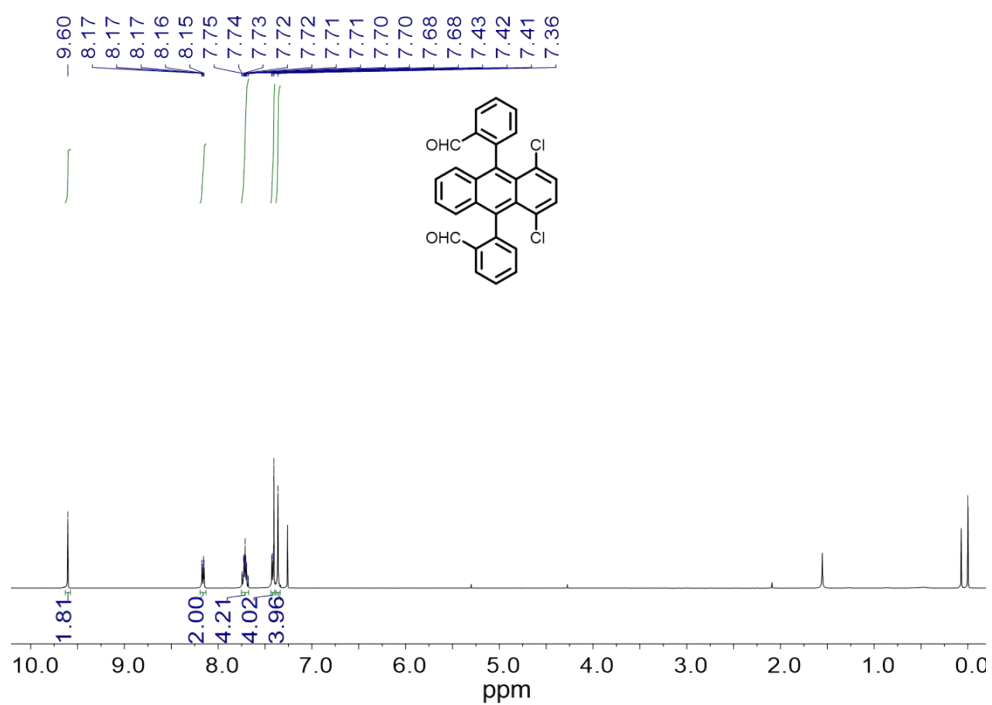

**Fig. S32**  $^1\text{H}$  NMR spectrum of *anti-1* in  $\text{CDCl}_3$  (400 MHz, 298 K).

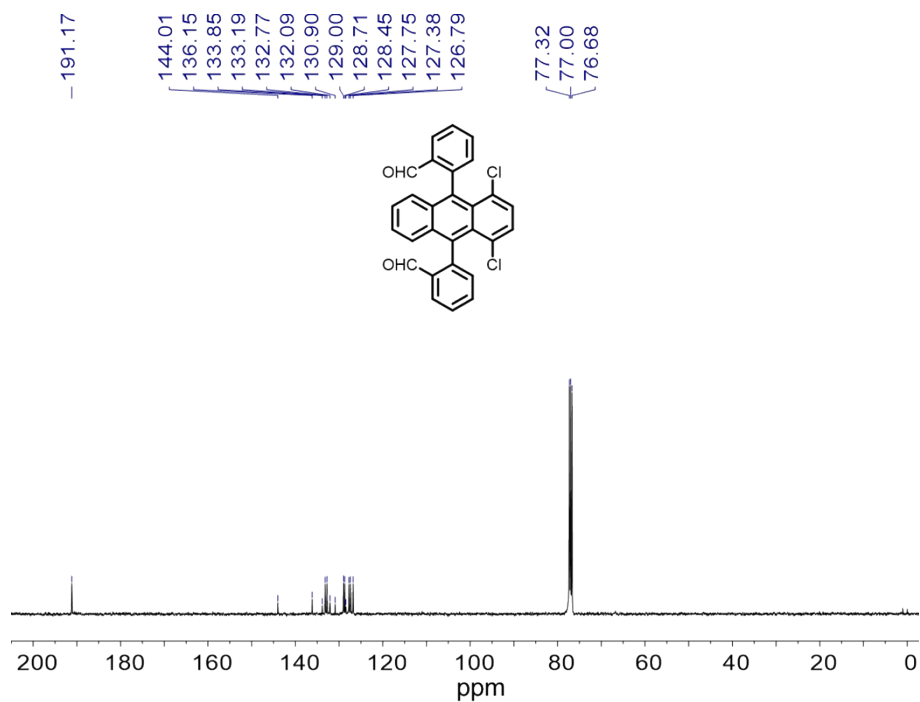

**Fig. S33**  $^{13}\text{C}$  NMR spectrum of *anti-1* in  $\text{CDCl}_3$  (400 MHz, 298 K).

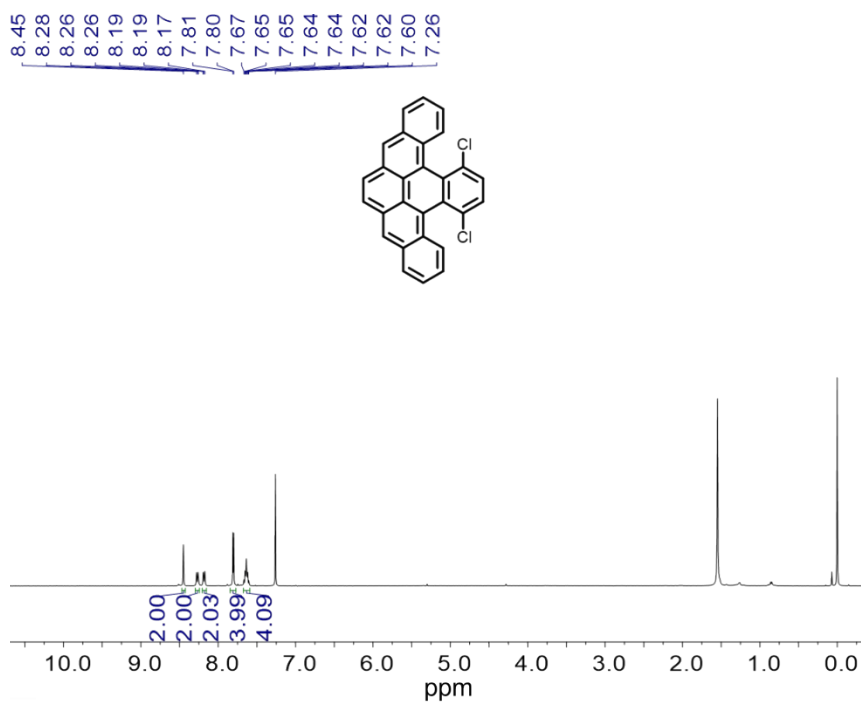

**Fig. S34**  $^1\text{H}$  NMR spectrum of **2** in  $\text{CDCl}_3$  (400 MHz, 298 K).

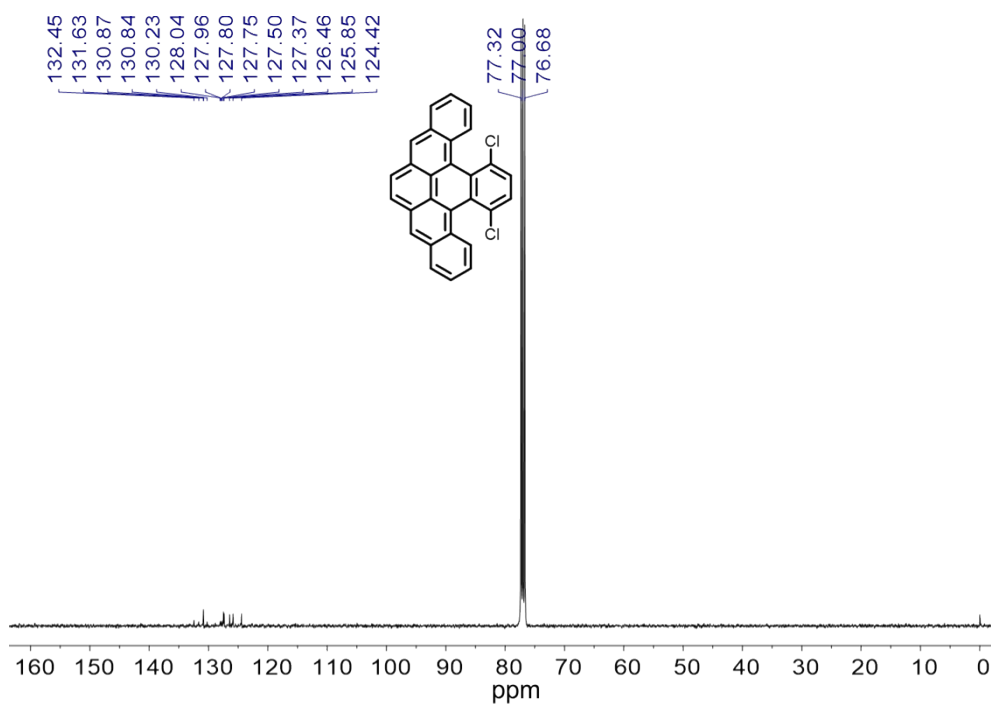

**Fig. S35**  $^{13}\text{C}$  NMR spectrum of **2** in  $\text{CDCl}_3$  (400 MHz, 298 K).

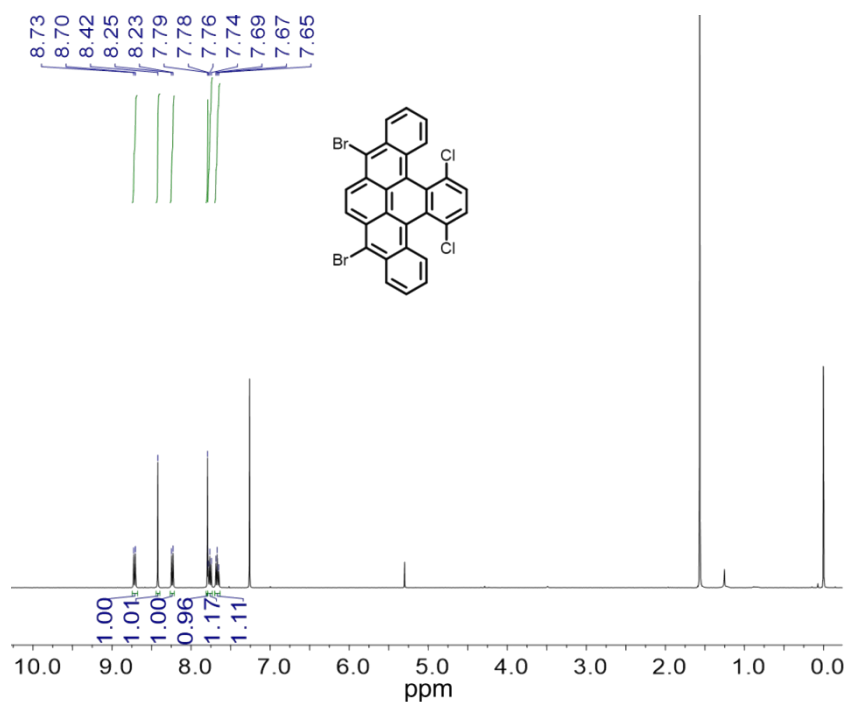

**Fig. S36**  $^1\text{H}$  NMR spectrum of **3** in  $\text{CDCl}_3$  (400 MHz, 298 K).

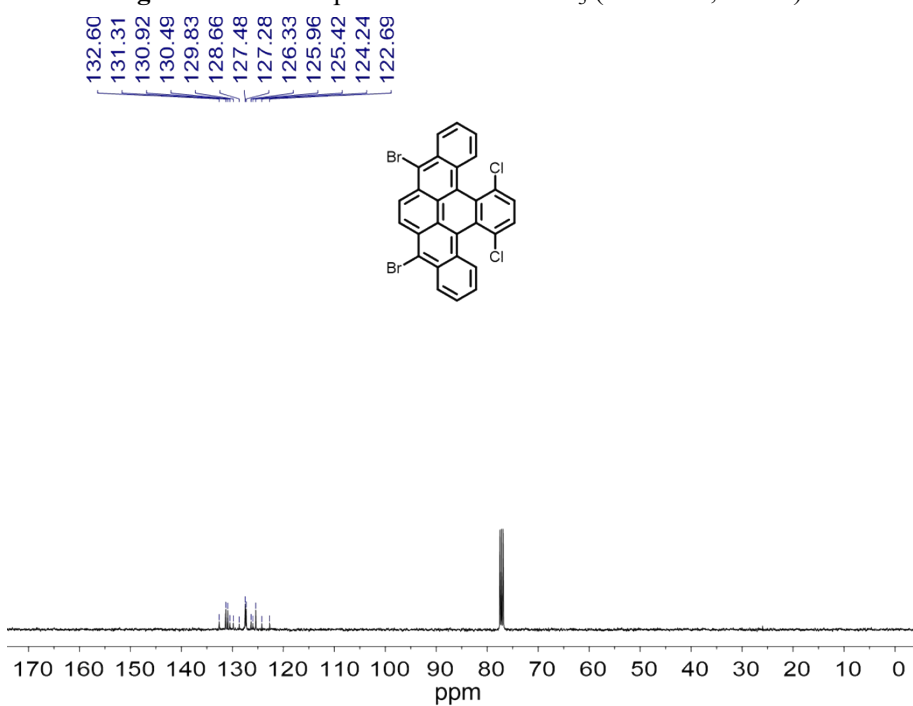

**Fig. S37**  $^{13}\text{C}$  NMR spectrum of **3** in  $\text{CDCl}_3/\text{CS}_2$  ( $v=1:1$ ) (400 MHz, 298 K).

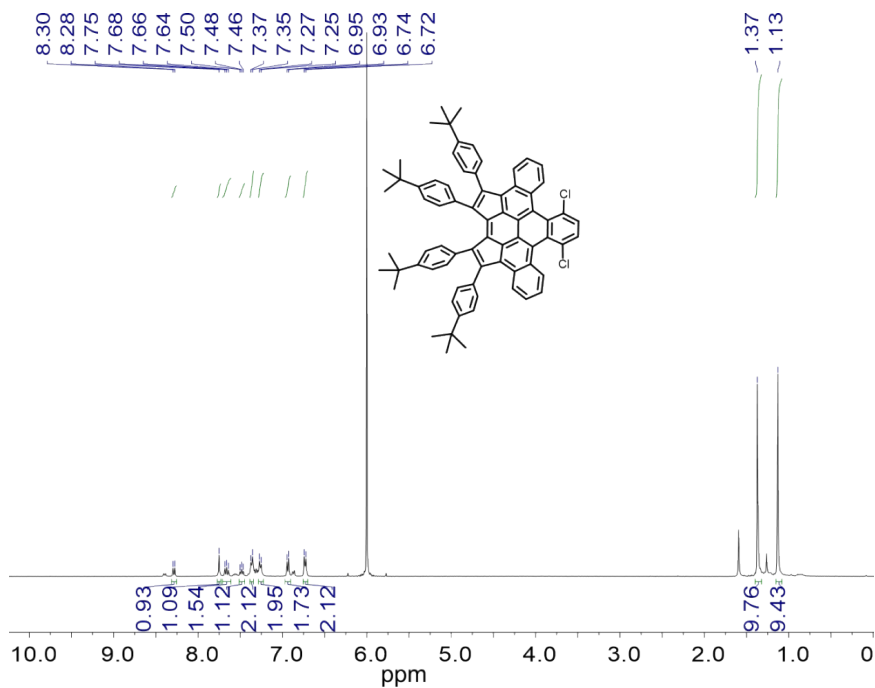

**Fig. S38**  $^1\text{H}$  NMR spectrum of **4** in  $\text{C}_2\text{D}_2\text{Cl}_4$  (400 MHz, 298 K).

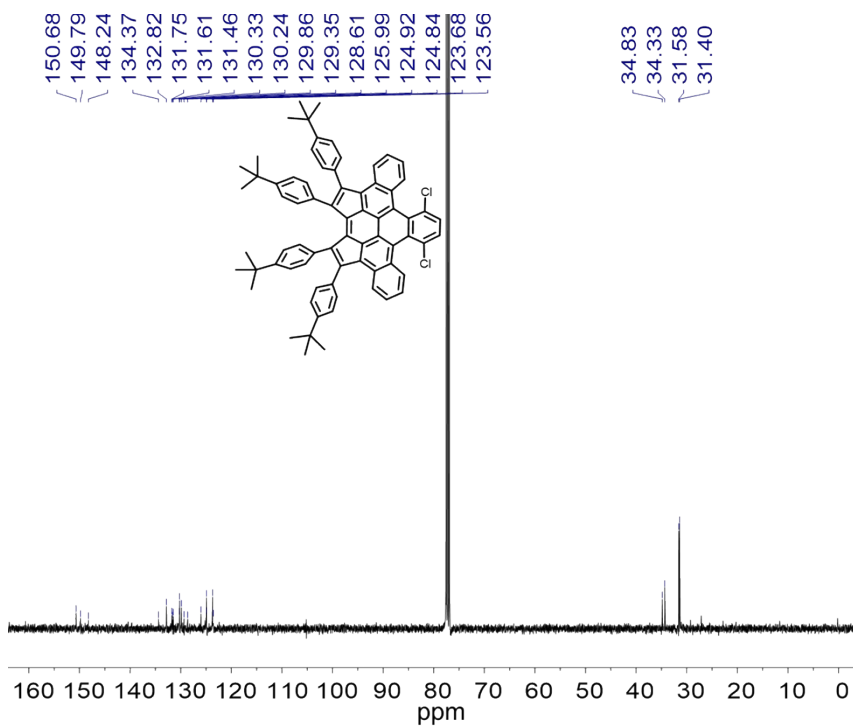

**Fig. S39**  $^{13}\text{C}$  NMR spectrum of **4** in  $\text{CDCl}_3$  (400 MHz, 298 K).

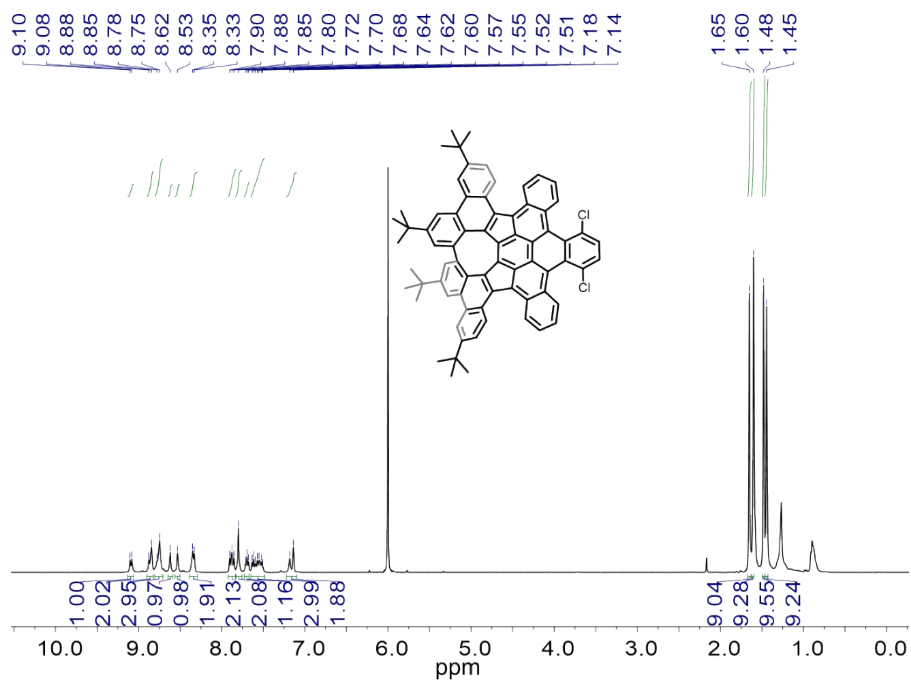

**Fig. S40**  $^1\text{H}$  NMR spectrum of **5** in  $\text{C}_2\text{D}_2\text{Cl}_4$  (400 MHz, 298 K).

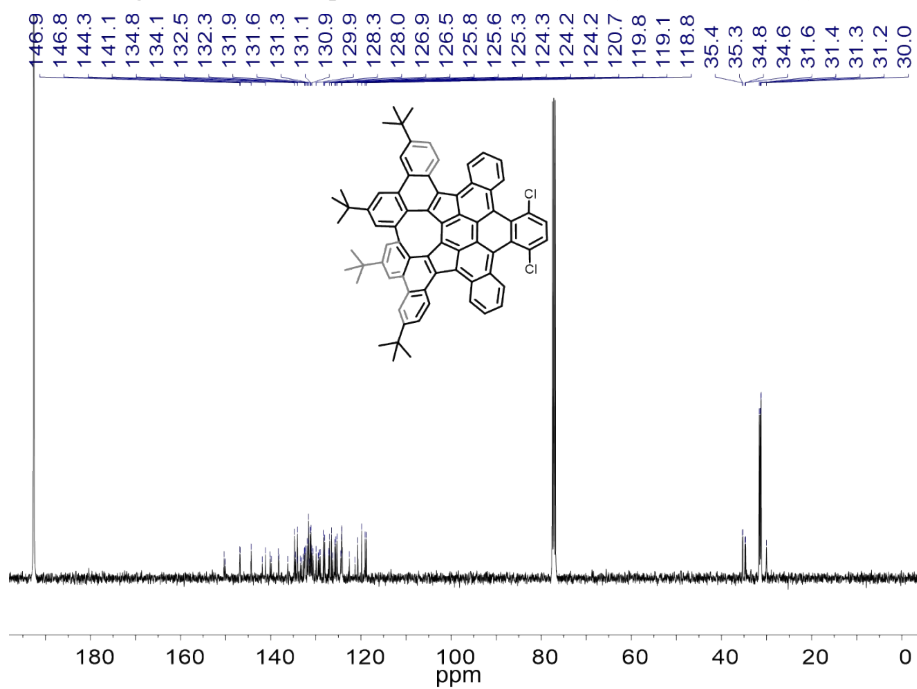

**Fig. S41**  $^{13}\text{C}$  NMR spectrum of **5** in  $\text{CDCl}_3/\text{CS}_2$  ( $v=1:1$ )(400 MHz, 298 K).





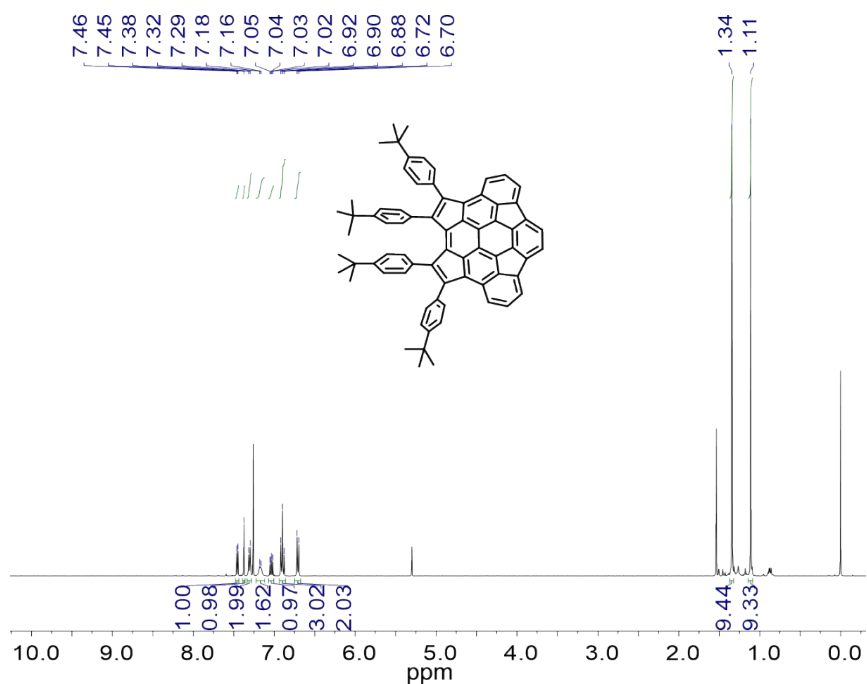

**Fig. S44**  $^1\text{H}$  NMR spectrum of **7** in  $\text{CDCl}_3$  (400 MHz, 298 K).

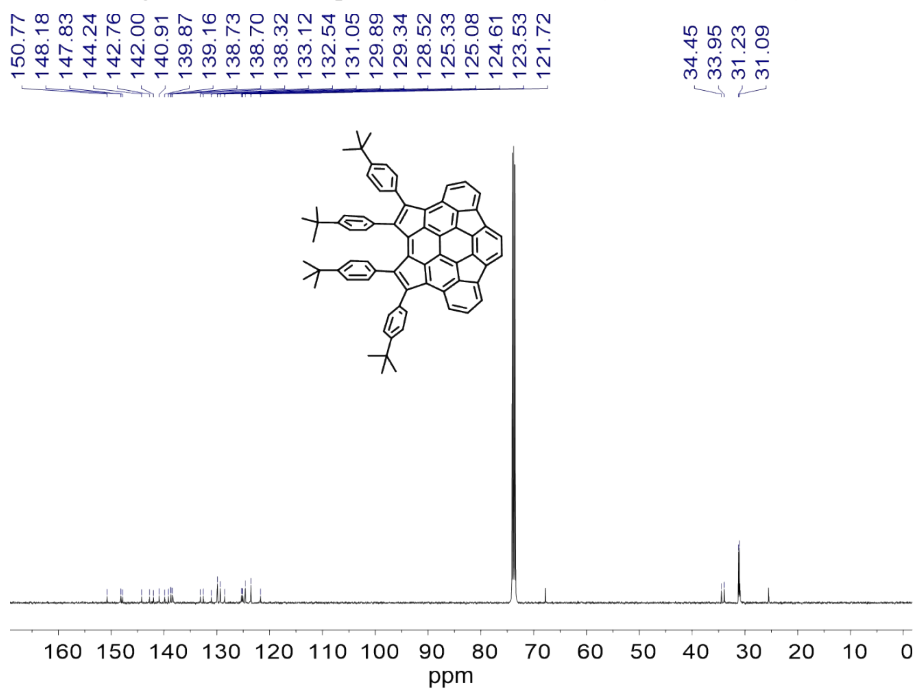

**Fig. S45**  $^{13}\text{C}$  NMR spectrum of **7** in  $\text{CDCl}_3/\text{CS}_2$  ( $\nu=1:1$ )(400 MHz, 298 K).

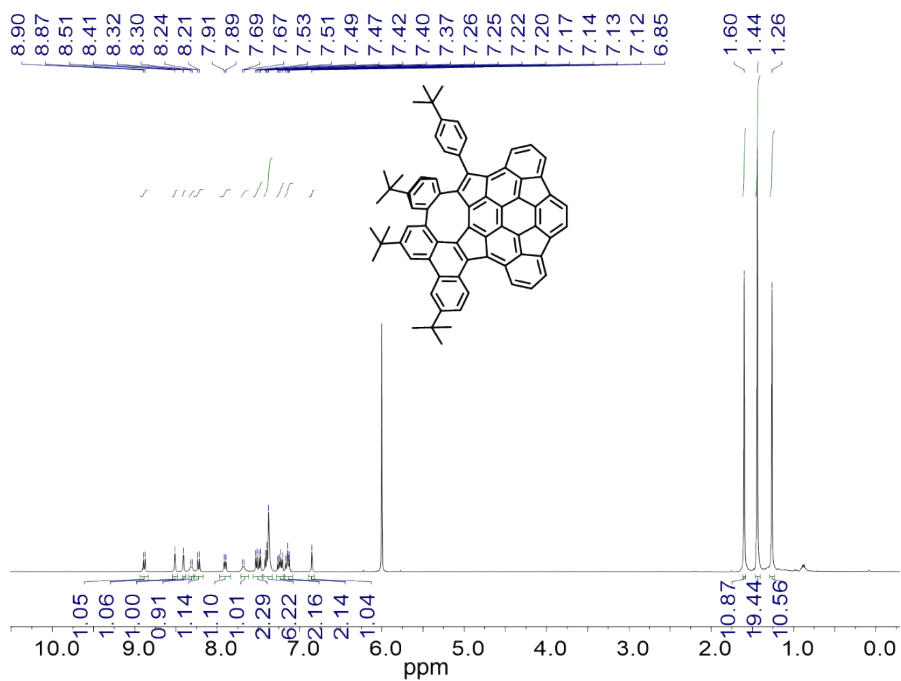

**Fig. S46**  $^1\text{H}$  NMR spectrum of **8** in  $\text{C}_2\text{D}_2\text{Cl}_4$  (400 MHz, 298 K).

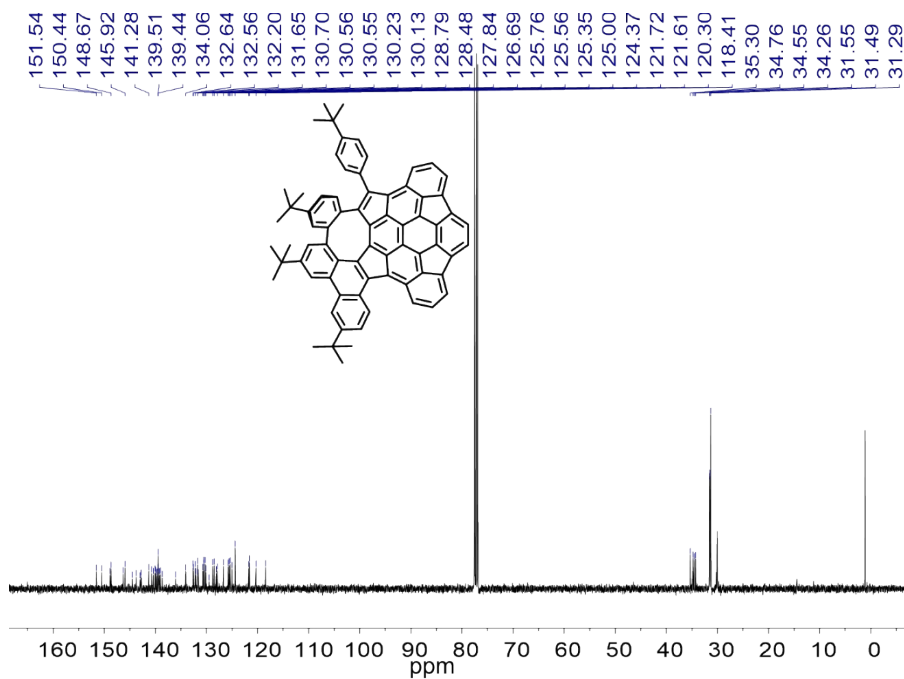

**Fig. S47**  $^{13}\text{C}$  NMR spectrum of **8** in  $\text{CDCl}_3/\text{CS}_2$  ( $\nu=1:1$ )(400 MHz, 298 K).

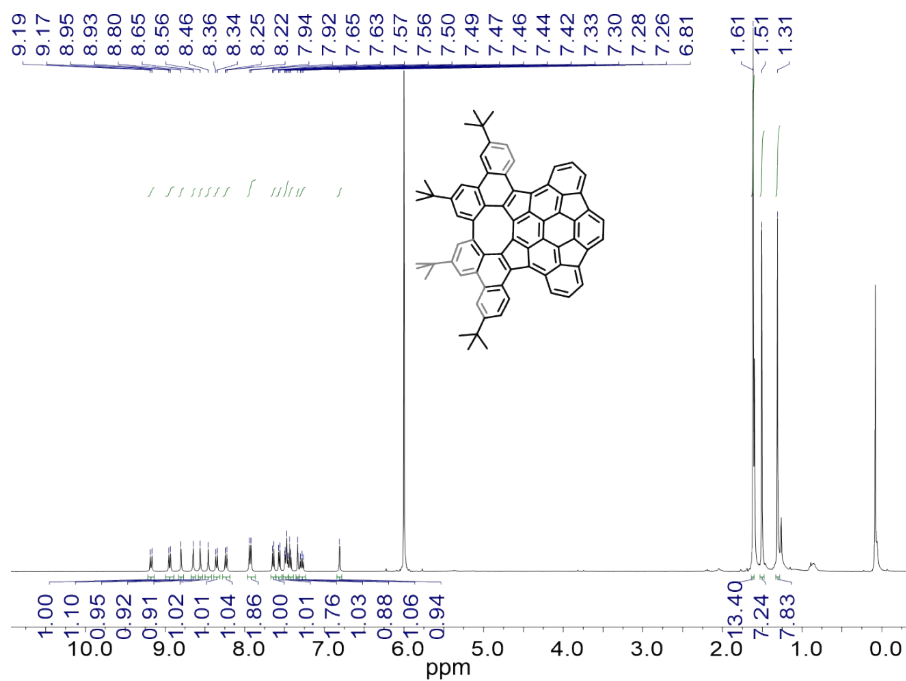

**Fig. S48**  $^1\text{H}$  NMR spectrum of **9** in  $\text{C}_2\text{D}_2\text{Cl}_4$  (400 MHz, 298 K).

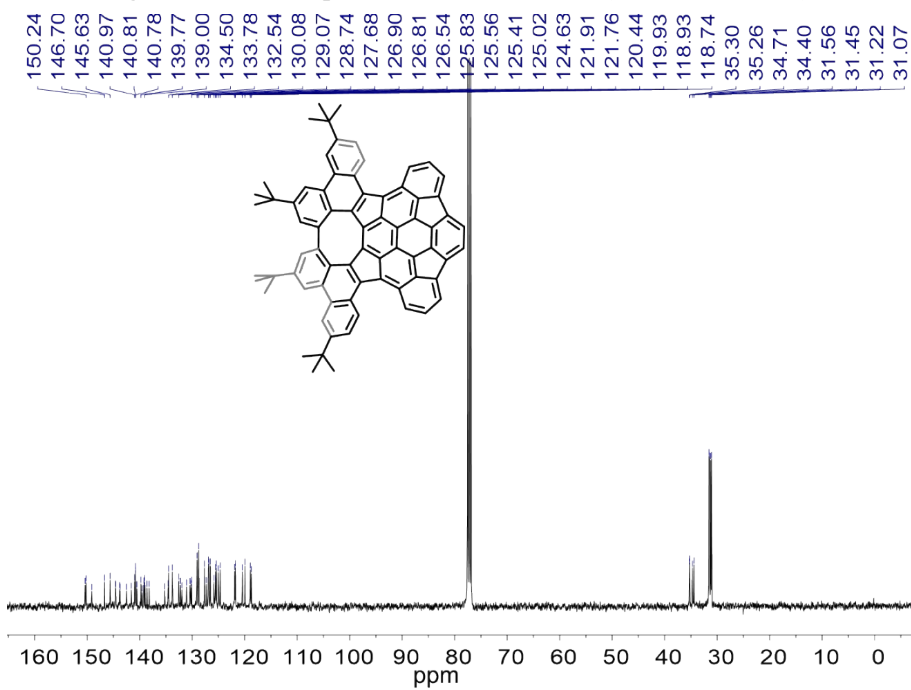

**Fig. S49**  $^{13}\text{C}$  NMR spectrum of **9** in  $\text{CDCl}_3/\text{CS}_2$  ( $v=1:1$ ) (400 MHz, 298 K).

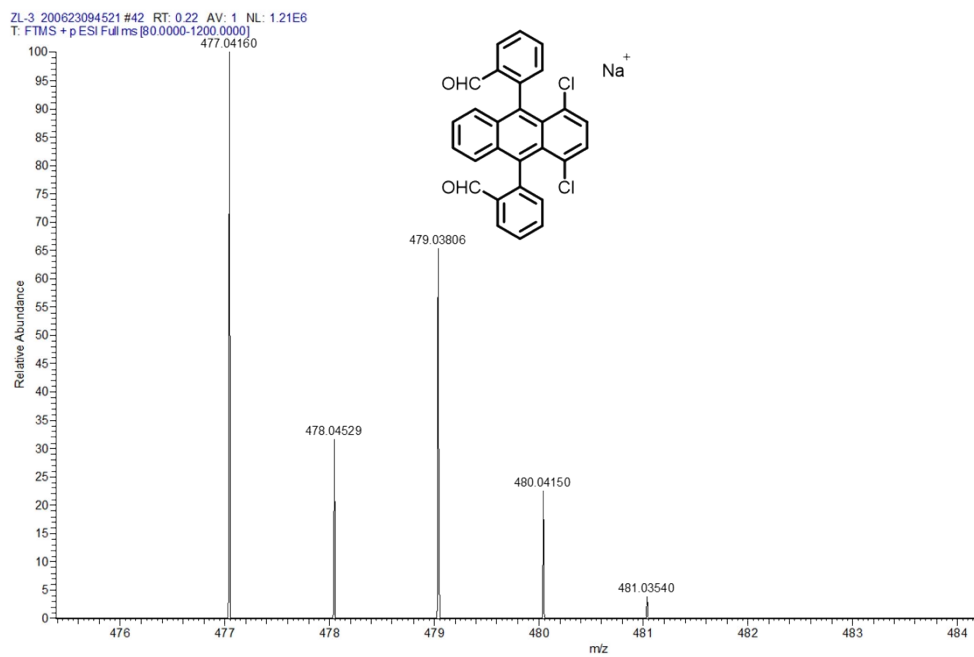

**Fig. S50** HR-ESI spectra of *syn-1*.

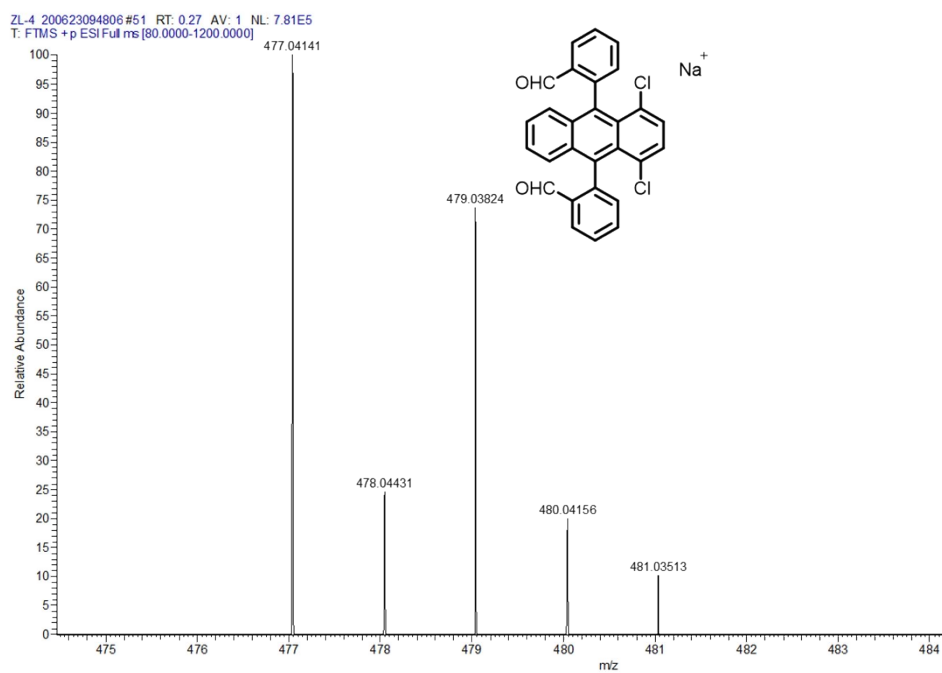

**Fig. S51** HR-ESI spectra of *anti-1*.

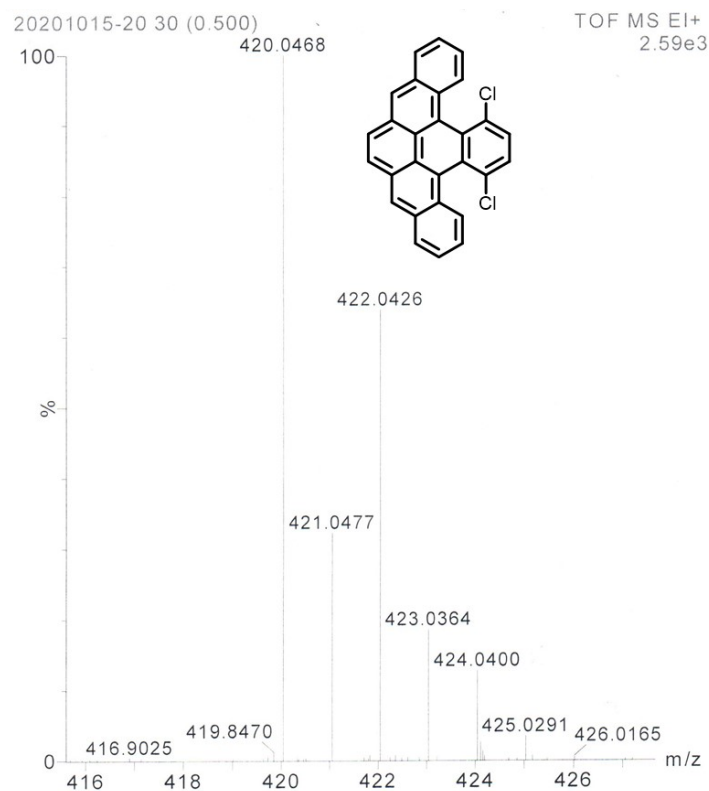

Fig. S52 HR-EI spectra of 2.

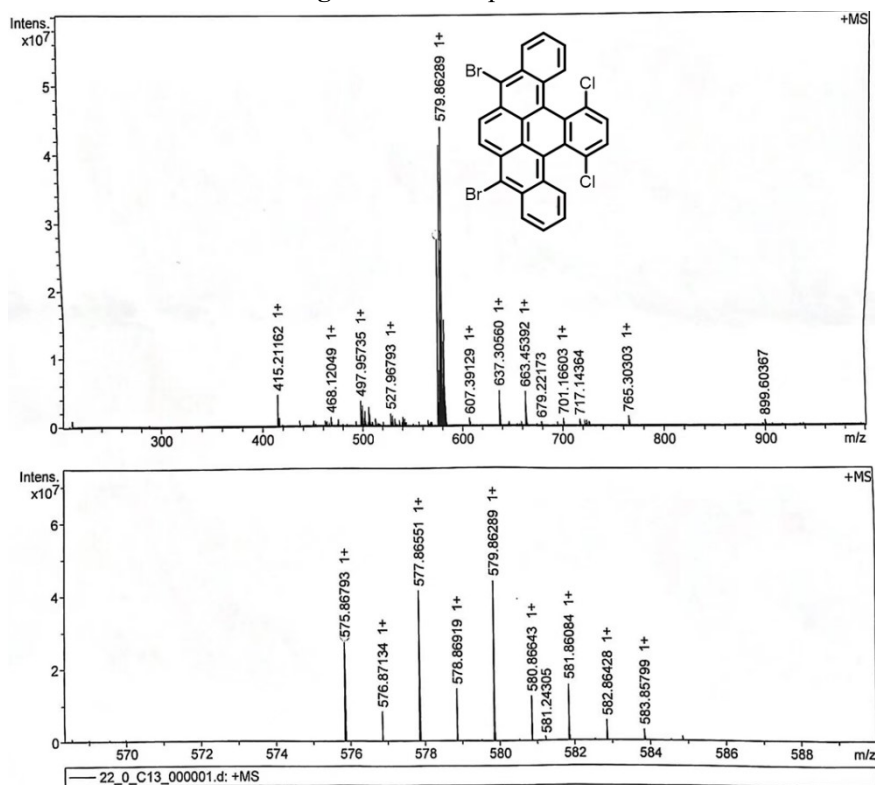

Fig. S53 HR-EI spectra of 3.

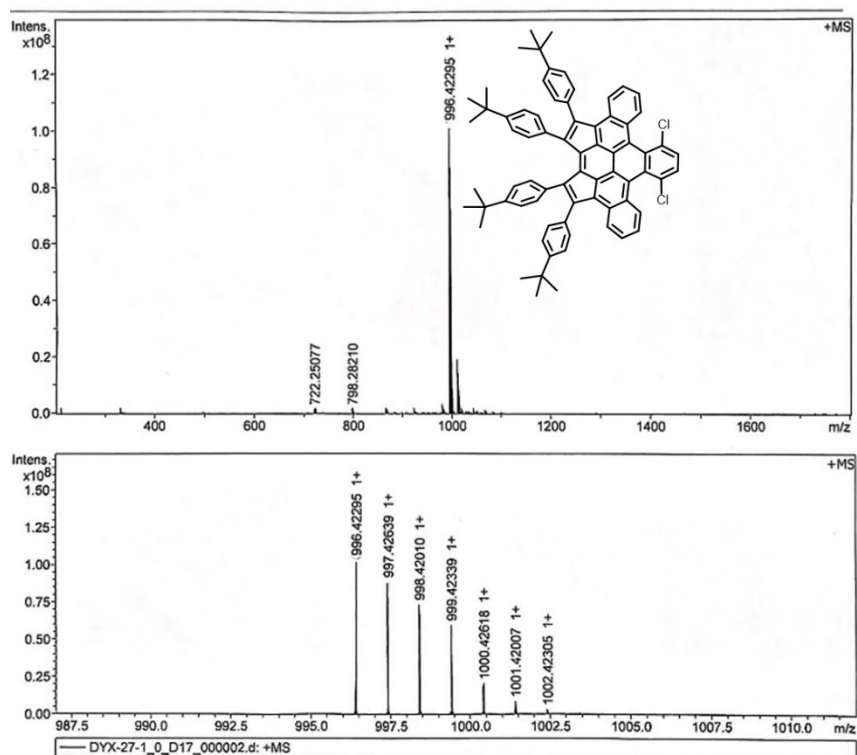

Fig. S54 HR-EI spectra of 4.

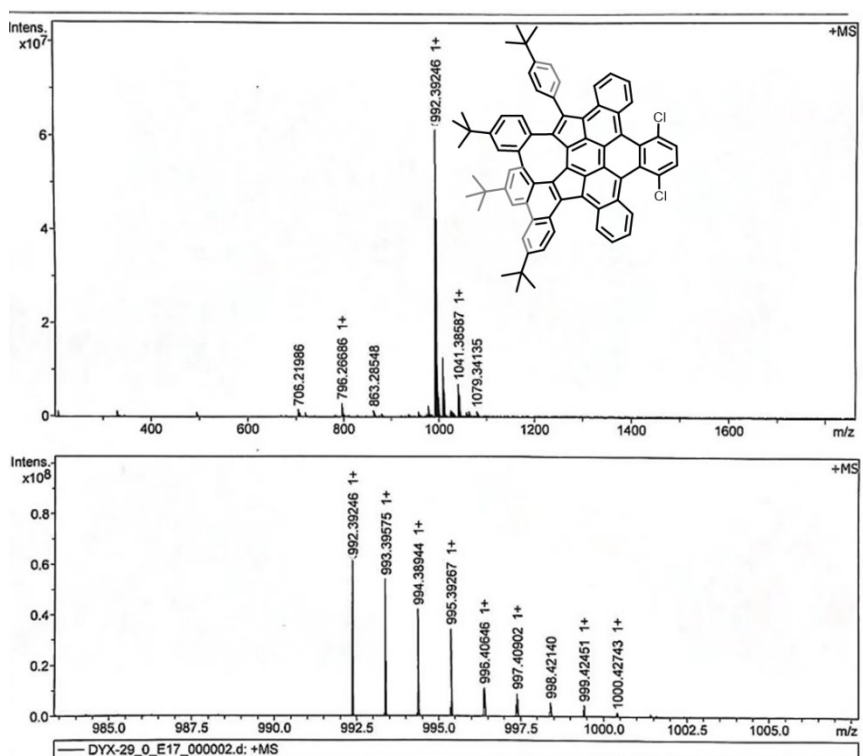

Fig. S55 HR-MALDI-TOF spectra of 5.

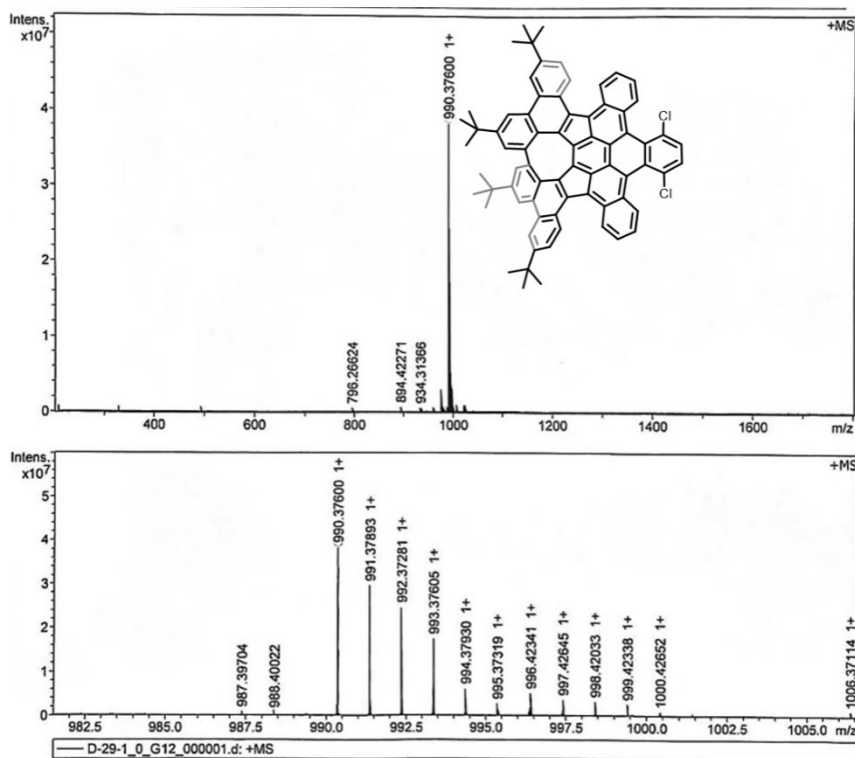

Fig. S56 HR-MALDI-TOF spectra of 6.

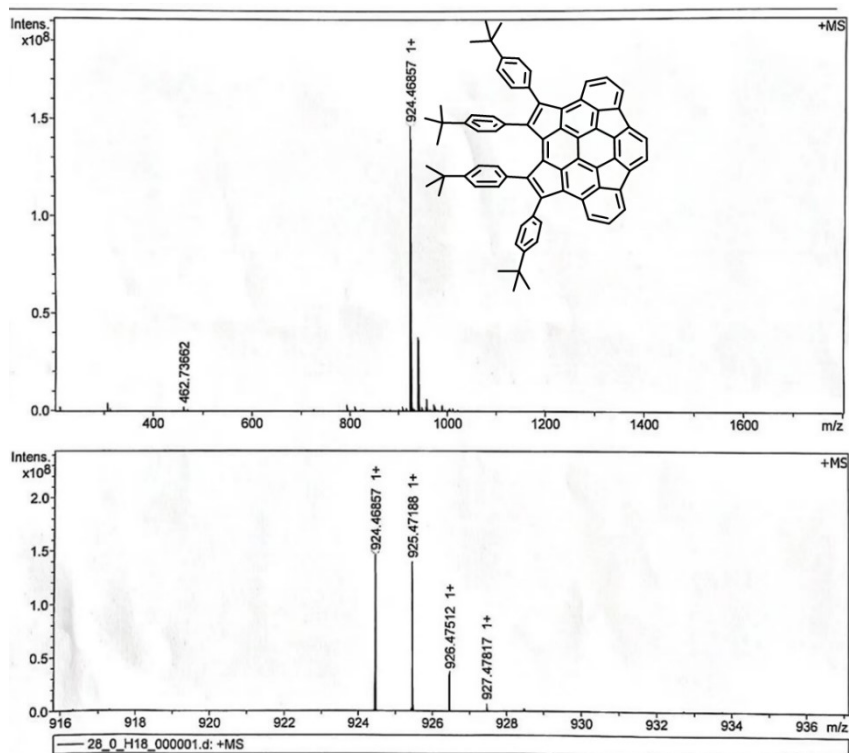

Fig. S57 HR-MALDI-TOF spectra of 7.



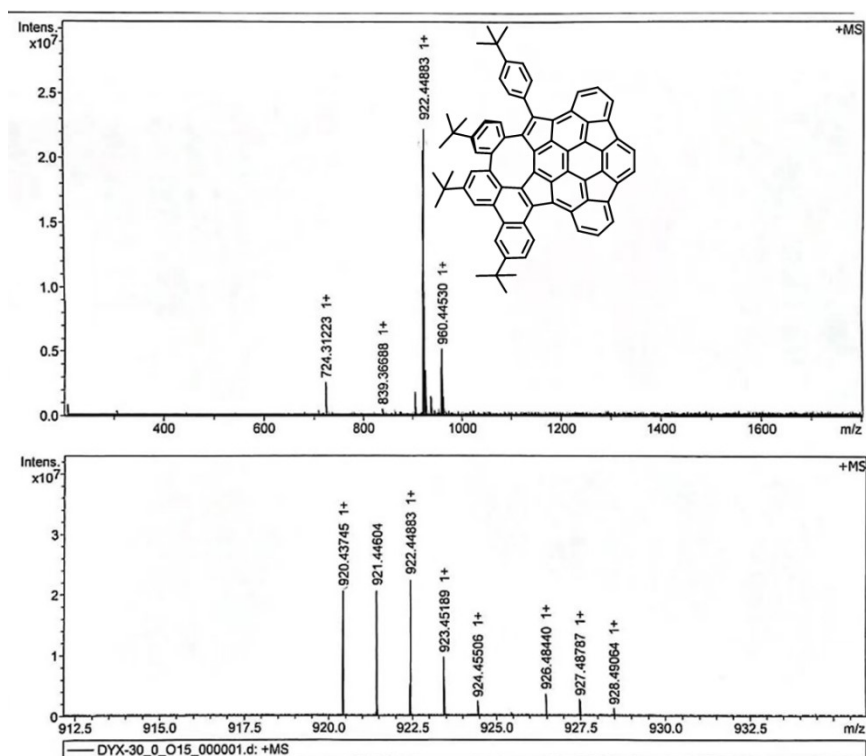

Fig. S58 HR-MALDI-TOF spectra of 8.

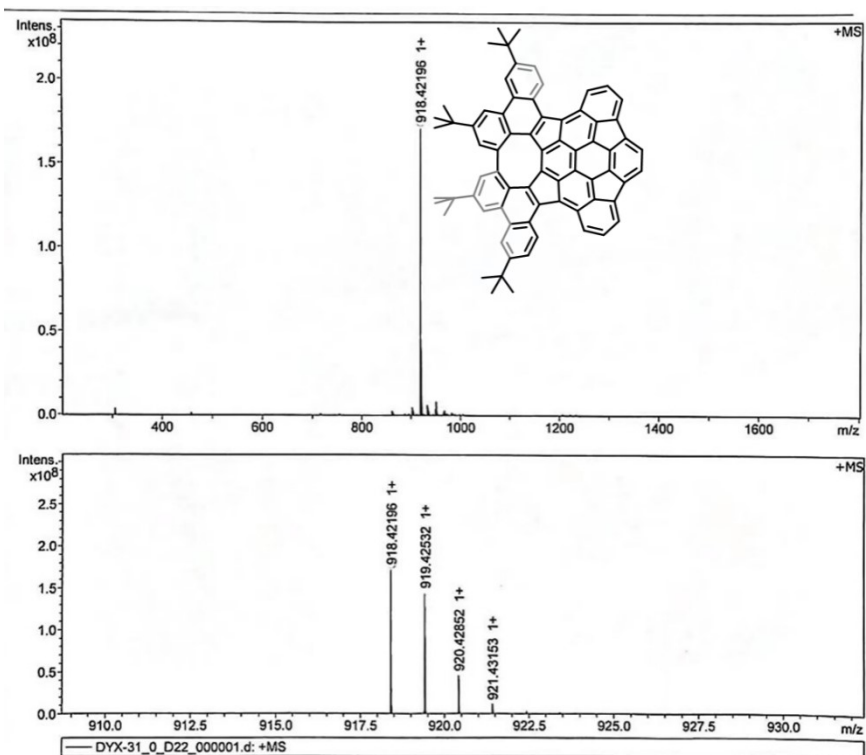

Fig. S59 HR-MALDI-TOF spectra of 9.

## 11. References

- [1] Gaussian 09, Revision D.01, M. J. Frisch, G. W. Trucks, H. B. Schlegel, G. E. Scuseria, M. A. Robb, J. R. Cheeseman, G. Scalmani, V. Barone, B. Mennucci, G. A. Petersson, H. Nakatsuji, M. Caricato, X. Li, H. P. Hratchian, A. F. Izmaylov, J. Bloino, G. Zheng, J. L. Sonnenberg, M. Hada, M. Ehara, K. Toyota, R. Fukuda, J. Hasegawa, M. Ishida, T. Nakajima, Y. Honda, O. Kitao, H. Nakai, T. Vreven, Jr. J. A. Montgomery, J. E. Peralta, F. Ogliaro, M. Bearpark, J. J. Heyd, E. Brothers, K. N. Kudin, V. N. Staroverov, T. Keith, R. Kobayashi, J. Normand, K. Raghavachari, A. Rendell, J. C. Burant, S. S. Iyengar, J. Tomasi, M. Cossi, N. Rega, J. M. Millam, M. Klene, J. E. Knox, J. B. Cross, V. Bakken, C. Adamo, J. Jaramillo, R. Gomperts, R. E. Stratmann, O. Yazyev, A. J. Austin, R. Cammi, C. Pomelli, J. W. Ochterski, R. L. Martin, K. Morokuma, V. G. Zakrzewski, G. A. Voth, P. Salvador, J. J. Dannenberg, S. Dapprich, A. D. Daniels, O. Farkas, J. B. Foresman, J. V. Ortiz, J. Cioslowski and D. J. Fox, Gaussian, Inc., Wallingford CT, 2013.
- [2] T. Lu, and F. Chen, *J. Comput. Chem*, 2012, **33**, 580.
- [3] P. v. R. Schleyer, C. Maerker, A. Dransfeld, H. J. Jiao and N. J. R. V. Hommes, *J. Am. Chem. Soc*, 1996, **118**, 6317.
- [4] D. Geuenich, K. Hess, F. Kohler and R. Herges, *Chem. Rev*, 2005, **105**, 3758.
- [5] W. Humphrey, A. Dalke and K. Schulten, *J. Mol. Graph*, 1996, **14**, 33.
- [6] G. te Velde,; F. M. Bickelhaupt, E. J. Baerends, C. Fonseca Guerra,; S. J. A. van Gisbergen, J. G. Snijders and T. Ziegler, *J. Comput. Chem*, 2001, **22**, 931.
- [7] C. F. Dickinson, J. K. Yang, G. P. A. Yap and M. A. Tius, *Org. Lett*, 2022, **24**, 5095.
- [8] P. Thordarson, *Chem. Soc. Rev*, 2011, **40**, 1305.
- [9] Q. Tang, Y. Tong, H. Li, Y. Zhu, Q. Li, W. Hu, Y. Liu and D. Zhu, *Adv. Mater*, 2008, **20**, 1511.
